# Supplementary material
Source: PubMed Central journal article supplement (PMC6648838)
Supplement: ao9b00677_si_001.pdf [file ao9b00677_si_001.pdf]

## Antioxidant Motifs in Flavonoids: O-H versus C-H Bond Dissociation

Quan V. Vo,<sup>\*,†,‡</sup> Pham Cam Nam,<sup>\*,§</sup> Nguyen Minh Thong,<sup>||</sup> Nguyen Tien Trung,<sup>⊥</sup>  
4 Cam-Tu D. Phan,<sup>⊥</sup> and Adam Mechler<sup>#</sup>

<sup>†</sup>Department for Management of Science and Technology Development, Ton Duc Thang University, Ho Chi Minh City 700000, Vietnam

<sup>‡</sup>Faculty of Applied Sciences, Ton Duc Thang University, Ho Chi Minh City 700000, Vietnam

<sup>§</sup>Department of Chemical Engineering, The University of Da Nang - University of Science and Technology, Da Nang 550000, Vietnam

<sup>||</sup>The University of Danang, Campus in Kon Tum, 704 Phan Dinh Phung, Kon Tum 580000, Vietnam

<sup>⊥</sup>Department of Chemistry, Quy Nhon University, Quy Nhon 591300, Vietnam

<sup>#</sup>Department of Chemistry and Physics, La Trobe University, Victoria 3086, Australia

\*Corresponding author: [vovanquan@tdtu.edu.vn](mailto:vovanquan@tdtu.edu.vn); [pcnam@dut.udn.vn](mailto:pcnam@dut.udn.vn)

### List of supporting information:

#### Table of Contents

|                                                                                                                                                                                                                                                                                      |     |
|--------------------------------------------------------------------------------------------------------------------------------------------------------------------------------------------------------------------------------------------------------------------------------------|-----|
| Table S1: BDE values of the X–H (X = O, C) bond breaking of different compounds in the gas phase using B3LYP/3-21g and ROB3LYP/6-311G++G(2df,2p)//B3LYP/6-311G(d,p) methods. ....                                                                                                    | S3  |
| Table S2: Proton affinities (PA) of the X–H (X = O, C) bond breaking in the gas phase calculated using B3LYP/3-21g and ROB3LYP/6-311G++G(2df,2p)//B3LYP/6-311G(d,p) methods. ....                                                                                                    | S6  |
| Table S3: The calculated thermal properties (in Kcal/mol) of the reaction between the studied compounds (for the lowest PAs(X–H)) with HOO• radical <i>via</i> sequential proton process in the studied solvents using the ROB3LYP/6-311G++G(2df,2p)//B3LYP/6-311G(d,p) methods..... | S9  |
| Table S4: Cartesian coordinates and molecular enthalpies of all parent molecules, radicals and anions optimized at B3LYP/6-311G(d,p) level of theory in the gas phase.....                                                                                                           | S10 |
| Table S5: Cartesian coordinates of all of the Int, TS of the selective compounds and HOO• optimized at B3LYP/6-311G(d,p) level of theory in the gas phase .....                                                                                                                      | S74 |

|                                                                                                                                                                                                                                |     |
|--------------------------------------------------------------------------------------------------------------------------------------------------------------------------------------------------------------------------------|-----|
| Table S6: The calculated $\Delta G^\ddagger$ and rate constant $k$ at the M05-2X/6-311G(d,p) level of theory at 298.15 K in the gas phase. ....                                                                                | S88 |
| Figure S1: Optimized geometries of the radicals of the compounds 1, 2, 4, 5, 6, 7 and 12. ....                                                                                                                                 | S89 |
| Figure S2: Topological shape of radicals formed by 1, 2, 4, 5, 6, 7 and 12 (B3LYP/6-311G(d,p)).....                                                                                                                            | S90 |
| Figure S3: IRC plots for all transition states related to the reaction of HOO• radical with dihydrokaempferol 1, and isomelacacidin 9 at B3LYP/6-311G(d,p) level of theory in the gas phase. ....                              | S91 |
| Figure S4. Optimized geometries of TS for the H abstraction channel of reaction between the selected phenolic compounds and the HOO• radical at the B3LYP/6-311G(d,p) level of theory (distances are given in angstroms) ..... | S92 |

**Table S1: BDE values of the X-H (X = O, C) bond breaking of different compounds in the gas phase using B3LYP/3-21g and ROB3LYP/6-311G++G(2df,2p)//B3LYP/6-311G(d,p) methods.**

| Comp. No | X-H (X = O, C) position | BDEs kcal/mol |                                              |
|----------|-------------------------|---------------|----------------------------------------------|
|          |                         | B3LYP/3-21G   | ROB3LYP/6-311G++G(2df,2p)//B3LYP/6-311G(d,p) |
| <b>1</b> | <b>1</b>                |               |                                              |
|          | O5-H                    | 83.6          |                                              |
|          | O7-H                    | <b>82.6</b>   | 93.6                                         |
|          | O4'-H                   | <b>82.8</b>   | 87.5                                         |
|          | O3-H                    | 90.5          |                                              |
|          | C2-H                    | 81.3          |                                              |
|          | C3-H                    | <b>66.5</b>   | 73.0                                         |
| <b>2</b> | <b>2</b>                |               |                                              |
|          | O5-H                    | 79.9          |                                              |
|          | O7-H                    | 81.7          |                                              |
|          | O3'-H                   | 71.9          |                                              |
|          | O4'-H                   | <b>64.9</b>   | 79.0                                         |
|          | O3-H                    | 90.5          |                                              |
|          | 2-C2-H                  | 79.9          |                                              |
|          | 2-C3-H                  | <b>65.7</b>   | 73.4                                         |
| <b>3</b> | <b>3</b>                |               |                                              |
|          | 3-O5-H                  | 84.0          |                                              |
|          | 3-O7-H                  | 84.0          |                                              |
|          | 3-O3-H                  | <b>76.8</b>   | 85.2                                         |
|          | 3-O4'-H                 | <b>77.1</b>   | 85.4                                         |
| <b>4</b> | <b>4</b>                |               |                                              |
|          | O7-H                    | <b>71.4</b>   | 79.3                                         |
|          | O8-H                    | 78.0          |                                              |
|          | O4'-H                   | 78.9          |                                              |
|          | O3-H                    | 98.6          |                                              |
|          | C2-H                    | 82.0          |                                              |
|          | C3-H                    | <b>74.1</b>   | 76.1                                         |
| <b>5</b> | <b>5</b>                |               |                                              |
|          | 5-O5-H                  | 80.0          |                                              |
|          | 5-O7-H                  | 81.6          |                                              |
|          | 5-O4'-H                 | <b>79.4</b>   | 88.0                                         |
|          | 5-C2-H                  | <b>79.8</b>   | 80.5                                         |
|          | 5-C3-H                  | 91.5          |                                              |
| <b>6</b> | <b>6</b>                |               |                                              |
|          | 6-O5-H                  | 97.5          |                                              |

|           |         |             |      |
|-----------|---------|-------------|------|
|           | 6-O7-H  | <b>85.7</b> | 94.0 |
|           | 6-O3-H  | 93.7        |      |
|           | 6-C2-H  | 74.6        |      |
|           | 6-C3-H  | <b>66.5</b> | 73.5 |
| <b>7</b>  | 7       |             |      |
|           | 7-O5-H  | 98.9        |      |
|           | 7-O7-H  | <b>85.5</b> | 93.5 |
|           | 7-C2-H  | <b>81.4</b> | 82.9 |
|           | 7-C3-H  | 91.8        |      |
| <b>8</b>  | 8       |             |      |
|           | 8-O5-H  | 78.0        |      |
|           | 8-O7-H  | 79.6        |      |
|           | 8-O4'-H | <b>69.4</b> | 77.2 |
|           | 8-O3'-H | 83.8        |      |
|           | 8-O3-H  | 95.1        |      |
|           | 8-C2-H  | <b>81.9</b> | 82.5 |
|           | 8-C3-H  | 92.0        |      |
|           | 8-C4-H  | 86.2        |      |
| <b>9</b>  | 9       |             |      |
|           | O7-H    | <b>68.8</b> | 77.0 |
|           | O8-H    | 76.7        |      |
|           | O3'-H   | 81.4        |      |
|           | O4'-H   | <b>70.4</b> | 77.8 |
|           | O3-H    | 92.7        |      |
|           | O4-H    | 89.7        |      |
|           | C2-H    | 78.8        |      |
|           | C3-H    | 93.9        |      |
|           | C4-H    | <b>77.2</b> | 80.3 |
| <b>10</b> | 10      |             |      |
|           | O7-H    | <b>69.0</b> | 77.1 |
|           | O8-H    | 76.9        |      |
|           | O4'-H   | 80.0        |      |
|           | O3-H    | 92.7        |      |
|           | O4-H    | 89.4        |      |
|           | C2-H    | 78.4        |      |
|           | C3-H    | 94.0        |      |
|           | C4-H    | <b>77.4</b> | 80.1 |
| <b>11</b> | 11      |             |      |
|           | O7-H    | <b>70.1</b> | 77.7 |
|           | O8-H    | 77.2        |      |
|           | O4'-H   | <b>69.3</b> | 77.3 |
|           | O5'-H   | 80.9        |      |

|           |       |             |      |
|-----------|-------|-------------|------|
|           | O3-H  | 99.2        |      |
|           | O4-H  | 96.2        |      |
|           | C2-H  | <b>82.0</b> | 82.6 |
|           | C3-H  | 91.0        |      |
|           | C4-H  | 84.6        |      |
| <b>12</b> | 12    |             |      |
|           | O5-H  | 81.9        |      |
|           | O7-H  | 69.2        |      |
|           | O4'-H | <b>69.8</b> | 78.2 |
|           | O5'-H | 81.0        |      |
|           | O3-H  | 90.4        |      |
|           | C2-H  | 80.7        |      |
|           | C3-H  | <b>65.5</b> | 73.7 |
| <b>13</b> | 13    |             |      |
|           | O7-H  | <b>70.3</b> | 77.8 |
|           | O8-H  | 77.3        |      |
|           | O4'-H | 79.0        |      |
|           | O3-H  | 99.0        |      |
|           | O4-H  | 96.3        |      |
|           | C2-H  | <b>81.5</b> | 82.2 |
|           | C3-H  | 91.1        |      |
|           | C4-H  | 84.7        |      |

**Table S2: Proton affinities (PA) of the X–H (X = O, C) bond breaking in the gas phase calculated using B3LYP/3-21g and ROB3LYP/6-311G++G(2df,2p)//B3LYP/6-311G(d,p) methods.**

| Comp. No | X-H (X = O, C) position | PAs kcal/mol |                                              |
|----------|-------------------------|--------------|----------------------------------------------|
|          |                         | B3LYP/3-21G  | ROB3LYP/6-311G++G(2df,2p)//B3LYP/6-311G(d,p) |
| <b>1</b> |                         |              |                                              |
|          | O5-H                    | 340.1        |                                              |
|          | O7-H                    | <b>337.6</b> | 326.8                                        |
|          | O4'-H                   | 348.0        |                                              |
|          | O3-H                    | 373.5        |                                              |
|          | C2-H                    | 370.0        |                                              |
|          | C3-H                    | 360.9        |                                              |
| <b>2</b> | <b>2</b>                |              |                                              |
|          | O5-H                    | 340.6        |                                              |
|          | O7-H                    | 323.2        |                                              |
|          | O3'-H                   | 356.0        |                                              |
|          | O4'-H                   | <b>321.5</b> | 323.4                                        |
|          | O3-H                    | 361.3        |                                              |
|          | 2-C2-H                  | 362.7        |                                              |
| 2-C3-H   | 341.9                   |              |                                              |
| <b>3</b> | <b>3</b>                |              |                                              |
|          | 3-O5-H                  | 351.1        |                                              |
|          | 3-O7-H                  | 336.1        |                                              |
|          | 3-O3-H                  | 342.0        |                                              |
|          | 3-O4'-H                 | <b>335.5</b> | 327.3                                        |
| <b>4</b> | <b>4</b>                |              |                                              |
|          | O7-H                    | <b>324.8</b> | 318.6                                        |
|          | O8-H                    | 348.4        |                                              |
|          | O4'-H                   | 353.6        |                                              |
|          | O3-H                    | 373.2        |                                              |
|          | C2-H                    | 374.6        |                                              |
| C3-H     | 364.2                   |              |                                              |
| <b>5</b> | <b>5</b>                |              |                                              |
|          | 5-O5-H                  | 337.6        |                                              |
|          | 5-O7-H                  | <b>335.1</b> | 330.0                                        |
|          | 5-O4'-H                 | 345.2        |                                              |
|          | 5-C2-H                  | 373.0        |                                              |
| 5-C3-H   | 369.0                   |              |                                              |
| <b>6</b> | <b>6</b>                |              |                                              |
|          | 6-O5-H                  | 337.5        |                                              |
|          | 6-O7-H                  | <b>320.8</b> | 320.0                                        |
|          | 6-O3-H                  | 372.1        |                                              |

|           |         |              |       |
|-----------|---------|--------------|-------|
|           | 6-C2-H  | 366.4        |       |
|           | 6-C3-H  | 359.5        |       |
| <b>7</b>  | 7       |              |       |
|           | 7-O5-H  | 360.2        |       |
|           | 7-O7-H  | <b>338.9</b> | 329.4 |
|           | 7-C2-H  | 371.3        |       |
|           | 7-C3-H  | 355.9        |       |
| <b>8</b>  | 8       |              |       |
|           | 8-O5-H  | 351.0        |       |
|           | 8-O7-H  | 347.1        |       |
|           | 8-O4'-H | <b>345.3</b> | 333.4 |
|           | 8-O3'-H | 383.6        |       |
|           | 8-O3-H  | 361.7        |       |
|           | 8-C2-H  | 381.1        |       |
|           | 8-C3-H  | 347.1        |       |
|           | 8-C4-H  | 388.7        |       |
| <b>9</b>  | 9       |              |       |
|           | O7-H    | 345.3        |       |
|           | O8-H    | 361.6        |       |
|           | O3'-H   | 353.0        |       |
|           | O4'-H   | <b>336.2</b> | 328.1 |
|           | O3-H    | 358.5        |       |
|           | O4-H    | 358.5        |       |
|           | C2-H    | 375.9        |       |
|           | C3-H    | 399.4        |       |
|           | C4-H    | 384.5        |       |
|           | 10      |              |       |
| <b>10</b> | O7-H    | <b>345.0</b> | 334.6 |
|           | O8-H    | 361.2        |       |
|           | O4'-H   | 348.1        |       |
|           | O3-H    | 357.0        |       |
|           | O4-H    | 357.0        |       |
|           | C2-H    | 377.2        |       |
|           | C3-H    | 399.0        |       |
|           | C4-H    | 383.5        |       |
| <b>11</b> | 11      |              |       |
|           | O7-H    | <b>336.0</b> | 330.5 |
|           | O8-H    | 353.5        |       |
|           | O4'-H   | 340.3        |       |
|           | O5'-H   | 359.0        |       |
|           | O3-H    | 358.8        |       |
|           | O4-H    | 358.9        |       |
|           | C2-H    | 377.8        |       |

|           |       |              |       |
|-----------|-------|--------------|-------|
|           | C3-H  | 405.1        |       |
|           | C4-H  | 386.1        |       |
| <b>12</b> | 12    |              |       |
|           | O5-H  | 341.5        |       |
|           | O7-H  | <b>324.1</b> | 328.1 |
|           | O4'-H | 338.7        |       |
|           | O5'-H | 362.7        |       |
|           | O3-H  | 356.3        |       |
|           | C2-H  | 362.7        |       |
|           | C3-H  | 342.9        |       |
| <b>13</b> | 13    |              |       |
|           | O7-H  | <b>335.5</b> | 330.1 |
|           | O8-H  | 352.9        |       |
|           | O4'-H | 352.1        |       |
|           | O3-H  | 357.5        |       |
|           | O4-H  | 357.5        |       |
|           | C2-H  | 378.4        |       |
|           | C3-H  | 404.3        |       |
|           | C4-H  | 385.3        |       |



**Table S3: The calculated thermal properties (in Kcal/mol) of the reaction between the studied compounds (for the lowest PAs(X-H)) with HOO• radical *via* sequential proton process in the studied solvents using the ROB3LYP/6-311G++G(2df,2p)//B3LYP/6-311G(d,p) methods**

| Comp.     | Thermal properties of the reaction between the studied compounds with HOO• radical <i>via</i> sequential proton process (in Kcal/mol) |            |            |            |            |            |
|-----------|---------------------------------------------------------------------------------------------------------------------------------------|------------|------------|------------|------------|------------|
|           | GAS                                                                                                                                   |            | WATER      |            | ETHANOL    |            |
|           | $\Delta H$                                                                                                                            | $\Delta G$ | $\Delta H$ | $\Delta G$ | $\Delta H$ | $\Delta G$ |
| <b>1</b>  | 171.6                                                                                                                                 | 120.4      | 63.2       | 62.8       | 66.2       | 65.9       |
| <b>2</b>  | 169.0                                                                                                                                 | 119.3      | 62.2       | 62.7       | 65.2       | 65.8       |
| <b>3</b>  | 172.9                                                                                                                                 | 125.9      | 66.0       | 66.0       | 69.0       | 69.0       |
| <b>4</b>  | 164.2                                                                                                                                 | 116.7      | 58.7       | 59.5       | 61.6       | 62.4       |
| <b>5</b>  | 175.6                                                                                                                                 | 122.4      | 63.9       | 63.6       | 67.1       | 66.8       |
| <b>6</b>  | 165.6                                                                                                                                 | 119.5      | 59.1       | 59.5       | 62.0       | 62.5       |
| <b>7</b>  | 175.0                                                                                                                                 | 124.7      | 63.8       | 63.7       | 66.9       | 66.9       |
| <b>8</b>  | 179.0                                                                                                                                 | 122.0      | 66.8       | 67.0       | 70.0       | 70.2       |
| <b>9</b>  | 174.4                                                                                                                                 | 121.7      | 65.7       | 66.0       | 68.7       | 69.0       |
| <b>10</b> | 180.2                                                                                                                                 | 124.3      | 67.1       | 67.7       | 70.4       | 70.9       |
| <b>11</b> | 176.1                                                                                                                                 | 123.2      | 66.5       | 66.8       | 69.5       | 69.9       |
| <b>12</b> | 173.7                                                                                                                                 | 122.7      | 65.2       | 65.8       | 68.3       | 68.9       |
| <b>13</b> | 175.7                                                                                                                                 | 124.4      | 66.3       | 66.9       | 69.4       | 70.0       |

**Table S4:** Cartesian coordinates and molecular enthalpies of all parent molecules, radicals and anions optimized at B3LYP/6-311G(d,p) level of theory in the gas phase.

| Name of compound (1)                                   |             | Dihydrokaempferol           |             |
|--------------------------------------------------------|-------------|-----------------------------|-------------|
| Cartesian Coordinates optimized at B3LYP/6-311G(d,p)   |             |                             |             |
| C                                                      | -2.60442300 | -0.06541200                 | 1.11605500  |
| C                                                      | -3.22242000 | -1.28621900                 | 0.88546900  |
| C                                                      | -1.83082600 | -1.61342900                 | -1.09979400 |
| H                                                      | -3.99857500 | -1.64159800                 | 1.54871800  |
| C                                                      | -0.99022800 | 1.70107000                  | 0.42567900  |
| C                                                      | 0.68639700  | 1.02153900                  | -1.34981200 |
| C                                                      | -0.01724500 | 2.17656800                  | -0.65183000 |
| O                                                      | -0.26387800 | -0.01028600                 | -1.75265400 |
| O                                                      | -1.27772500 | 2.47260300                  | 1.35488900  |
| C                                                      | 1.83658400  | 0.39353200                  | -0.58701400 |
| C                                                      | 2.73288400  | -0.41296400                 | -1.29595000 |
| C                                                      | 2.04225000  | 0.54906600                  | 0.78910600  |
| C                                                      | 3.79464400  | -1.04605100                 | -0.66279800 |
| H                                                      | 2.59348200  | -0.55326300                 | -2.36250200 |
| C                                                      | 3.10268900  | -0.07504300                 | 1.43515900  |
| H                                                      | 1.37955000  | 1.16686400                  | 1.38282500  |
| C                                                      | 3.98395100  | -0.87854400                 | 0.71174000  |
| H                                                      | 4.47951700  | -1.66498500                 | -1.23515100 |
| O                                                      | 5.00701300  | -1.46654700                 | 1.39387700  |
| H                                                      | 5.53713700  | -1.99242300                 | 0.78601600  |
| C                                                      | -1.20829300 | -0.39637700                 | -0.86854900 |
| C                                                      | -1.58061100 | 0.40820500                  | 0.23790800  |
| O                                                      | -0.76056500 | 2.88094800                  | -1.64590500 |
| H                                                      | -1.22487100 | 3.60037800                  | -1.20306300 |
| H                                                      | -1.52367400 | -2.21226500                 | -1.94894200 |
| O                                                      | -2.98661900 | 0.66836700                  | 2.16642800  |
| H                                                      | -2.46050900 | 1.50298600                  | 2.14825000  |
| H                                                      | 3.26049400  | 0.04925400                  | 2.49929800  |
| C                                                      | -2.83493000 | -2.04179400                 | -0.22191200 |
| O                                                      | -3.47159100 | -3.22475700                 | -0.40476500 |
| H                                                      | -3.13267100 | -3.65193000                 | -1.19883700 |
| H                                                      | 1.04794200  | 1.39830800                  | -2.30764600 |
| H                                                      | 0.72656200  | 2.83116200                  | -0.18466800 |
| Frequency and Energy at B3LYP/6-311G(d,p) in gas phase |             |                             |             |
| Zero-point correction=                                 |             | 0.248814 (Hartree/Particle) |             |
| Thermal correction to Energy=                          |             | 0.266037                    |             |
| Thermal correction to Enthalpy=                        |             | 0.266981                    |             |
| Thermal correction to Gibbs Free Energy=               |             | 0.203157                    |             |
| Sum of electronic and zero-point Energies=             |             | -1030.181779                |             |
| Sum of electronic and thermal Energies=                |             | -1030.164555                |             |
| Sum of electronic and thermal Enthalpies=              |             | -1030.163611                |             |
| Sum of electronic and thermal Free Energies=           |             | -1030.227436                |             |
| Name of radical                                        |             | C3-H                        |             |
| Cartesian Coordinates optimized at B3LYP/6-311G(d,p)   |             |                             |             |
| C                                                      | 3.45108800  | 0.58783800                  | -0.25918400 |
| C                                                      | 4.23779100  | -0.55822900                 | -0.23542300 |
| C                                                      | 2.25696400  | -1.90748500                 | 0.24803600  |
| H                                                      | 5.30142400  | -0.49558000                 | -0.41887100 |
| C                                                      | 1.21165700  | 1.67433100                  | -0.05843000 |

|                                                        |                             |             |             |
|--------------------------------------------------------|-----------------------------|-------------|-------------|
| C                                                      | -0.69334400                 | 0.18817300  | 0.81524200  |
| C                                                      | -0.15595700                 | 1.48543200  | 0.29243200  |
| O                                                      | 0.13516400                  | -0.92343800 | 0.40123900  |
| O                                                      | 1.60683900                  | 2.83832600  | -0.35774600 |
| C                                                      | -2.11589200                 | -0.10534800 | 0.39531100  |
| C                                                      | -3.15407400                 | -0.04322600 | 1.32029900  |
| C                                                      | -2.41383500                 | -0.43136000 | -0.93258900 |
| C                                                      | -4.46945500                 | -0.29265700 | 0.93630500  |
| H                                                      | -2.94151400                 | 0.20299700  | 2.35527400  |
| C                                                      | -3.71715100                 | -0.68962100 | -1.32602400 |
| H                                                      | -1.61374800                 | -0.49392400 | -1.66101900 |
| C                                                      | -4.75413500                 | -0.61785000 | -0.38993700 |
| H                                                      | -5.26958400                 | -0.24040200 | 1.66865300  |
| O                                                      | -6.01651100                 | -0.87950700 | -0.83351700 |
| H                                                      | -6.63696200                 | -0.79299400 | -0.10232700 |
| C                                                      | 1.47862400                  | -0.76109500 | 0.23040000  |
| C                                                      | 2.05363800                  | 0.50291500  | -0.01402700 |
| O                                                      | -0.94350200                 | 2.55785500  | 0.31813100  |
| H                                                      | -0.35972200                 | 3.29389300  | 0.03615600  |
| H                                                      | 1.78888800                  | -2.86628600 | 0.43707400  |
| O                                                      | 4.02287500                  | 1.77159100  | -0.51869300 |
| H                                                      | 3.30788100                  | 2.45061900  | -0.53211000 |
| H                                                      | -3.95626700                 | -0.94738100 | -2.35042000 |
| C                                                      | 3.63465900                  | -1.79075100 | 0.01283800  |
| O                                                      | 4.44668300                  | -2.87928300 | 0.02163700  |
| H                                                      | 3.92230900                  | -3.66912800 | 0.19108700  |
| H                                                      | -0.65855800                 | 0.22743200  | 1.91659300  |
| Frequency and Energy at B3LYP/6-311G(d,p) in gas phase |                             |             |             |
| Zero-point correction=                                 | 0.235990 (Hartree/Particle) |             |             |
| Thermal correction to Energy=                          | 0.253108                    |             |             |
| Thermal correction to Enthalpy=                        | 0.254053                    |             |             |
| Thermal correction to Gibbs Free Energy=               | 0.189238                    |             |             |
| Sum of electronic and zero-point Energies=             | -1029.569276                |             |             |
| Sum of electronic and thermal Energies=                | -1029.552157                |             |             |
| Sum of electronic and thermal Enthalpies=              | -1029.551213                |             |             |
| Sum of electronic and thermal Free Energies=           | -1029.616028                |             |             |
| <b>Name of radical</b>                                 | O4'-H                       |             |             |
| Cartesian Coordinates optimized at B3LYP/6-311G(d,p)   |                             |             |             |
| C                                                      | -2.60784400                 | 0.12613600  | 1.15842000  |
| C                                                      | -3.42977400                 | -0.94576000 | 0.83867700  |
| C                                                      | -2.11413000                 | -1.35121100 | -1.18359200 |
| H                                                      | -4.25855700                 | -1.21008600 | 1.48042600  |
| C                                                      | -0.72204700                 | 1.64699800  | 0.57537000  |
| C                                                      | 0.78867500                  | 0.85612200  | -1.31000900 |
| C                                                      | 0.27864300                  | 2.05556900  | -0.50346000 |
| O                                                      | -0.26718600                 | -0.02883300 | -1.71207400 |
| O                                                      | -0.87276700                 | 2.38324800  | 1.55986100  |
| C                                                      | 1.91468400                  | 0.11266200  | -0.61406400 |
| C                                                      | 1.76229900                  | -1.19562100 | -0.11245200 |
| C                                                      | 3.17037000                  | 0.75809500  | -0.49972200 |
| C                                                      | 2.80986700                  | -1.83576600 | 0.50683000  |
| H                                                      | 0.81157800                  | -1.70117800 | -0.21818600 |
| C                                                      | 4.23116900                  | 0.14124300  | 0.11045300  |
| H                                                      | 3.29283400                  | 1.75517100  | -0.91191700 |

|                                                        |                             |             |             |
|--------------------------------------------------------|-----------------------------|-------------|-------------|
| C                                                      | 4.10423900                  | -1.19899600 | 0.65544300  |
| H                                                      | 2.70831000                  | -2.83906100 | 0.90333100  |
| O                                                      | 5.06212700                  | -1.77449100 | 1.21527500  |
| C                                                      | -1.28935400                 | -0.28627500 | -0.85888600 |
| C                                                      | -1.51370700                 | 0.48057500  | 0.30900300  |
| O                                                      | -0.37419500                 | 2.93136000  | -1.41844100 |
| H                                                      | -0.72081400                 | 3.67597300  | -0.91337000 |
| H                                                      | -1.91780000                 | -1.92029100 | -2.08443700 |
| O                                                      | -2.85998100                 | 0.82974400  | 2.26502000  |
| H                                                      | -2.19866500                 | 1.56008800  | 2.31000600  |
| H                                                      | 5.19795000                  | 0.62174500  | 0.20229200  |
| C                                                      | -3.18214900                 | -1.66511600 | -0.33054800 |
| O                                                      | -4.01877100                 | -2.69495600 | -0.59962100 |
| H                                                      | -3.76605300                 | -3.11145400 | -1.43079200 |
| H                                                      | 1.16868100                  | 1.25773600  | -2.25337900 |
| H                                                      | 1.12307300                  | 2.55085300  | -0.01290500 |
| Frequency and Energy at B3LYP/6-311G(d,p) in gas phase |                             |             |             |
| Zero-point correction=                                 | 0.235446 (Hartree/Particle) |             |             |
| Thermal correction to Energy=                          | 0.252461                    |             |             |
| Thermal correction to Enthalpy=                        | 0.253405                    |             |             |
| Thermal correction to Gibbs Free Energy=               | 0.189005                    |             |             |
| Sum of electronic and zero-point Energies=             | -1029.549816                |             |             |
| Sum of electronic and thermal Energies=                | -1029.532801                |             |             |
| Sum of electronic and thermal Enthalpies=              | -1029.531857                |             |             |
| Sum of electronic and thermal Free Energies=           | -1029.596257                |             |             |
| <b>Name of anion</b>                                   |                             | C3-H        |             |
| Cartesian Coordinates optimized at B3LYP/6-311G(d,p)   |                             |             |             |
| C                                                      | 3.37596700                  | 0.61224000  | -0.38163300 |
| C                                                      | 4.20828100                  | -0.51391900 | -0.30933700 |
| C                                                      | 2.31475200                  | -1.86392900 | 0.41186400  |
| H                                                      | 5.25753300                  | -0.43297500 | -0.56345300 |
| C                                                      | 1.11988700                  | 1.67415800  | -0.13140300 |
| C                                                      | -0.67769600                 | 0.23748800  | 0.89452400  |
| C                                                      | -0.16620100                 | 1.49462300  | 0.26932600  |
| O                                                      | 0.16737300                  | -0.90292500 | 0.61305100  |
| O                                                      | 1.58674300                  | 2.83620700  | -0.53001600 |
| C                                                      | -2.08777000                 | -0.12322300 | 0.43746200  |
| C                                                      | -3.18919700                 | 0.48085100  | 1.04147600  |
| C                                                      | -2.31474700                 | -1.02317400 | -0.60524300 |
| C                                                      | -4.48666900                 | 0.19851700  | 0.61792700  |
| H                                                      | -3.02842300                 | 1.19537000  | 1.84122000  |
| C                                                      | -3.60539200                 | -1.32429400 | -1.02991000 |
| H                                                      | -1.46310500                 | -1.49462700 | -1.07907000 |
| C                                                      | -4.69674200                 | -0.70924800 | -0.41878300 |
| H                                                      | -5.33507600                 | 0.68561900  | 1.09394700  |
| O                                                      | -5.95862800                 | -1.03381000 | -0.87087200 |
| H                                                      | -6.59493700                 | -0.50892800 | -0.37576500 |
| C                                                      | 1.50013900                  | -0.73185700 | 0.33599500  |
| C                                                      | 2.00672300                  | 0.50603600  | -0.05143500 |
| O                                                      | -1.01029700                 | 2.60018500  | 0.35438000  |
| H                                                      | -0.42062800                 | 3.31116100  | 0.04572400  |
| H                                                      | 1.88779900                  | -2.81273500 | 0.72161700  |
| O                                                      | 3.86490100                  | 1.80051100  | -0.76997500 |
| H                                                      | 3.04361600                  | 2.42786100  | -0.74539700 |

|                                                        |                             |             |             |
|--------------------------------------------------------|-----------------------------|-------------|-------------|
| H                                                      | -3.78346100                 | -2.02891600 | -1.83449400 |
| C                                                      | 3.66652400                  | -1.73392200 | 0.08214800  |
| O                                                      | 4.51961200                  | -2.82268800 | 0.14213300  |
| H                                                      | 3.99402900                  | -3.58315400 | 0.40739600  |
| H                                                      | -0.72212300                 | 0.33940800  | 2.00080400  |
| Frequency and Energy at B3LYP/6-311G(d,p) in gas phase |                             |             |             |
| Zero-point correction=                                 | 0.232475 (Hartree/Particle) |             |             |
| Thermal correction to Energy=                          | 0.249968                    |             |             |
| Thermal correction to Enthalpy=                        | 0.250912                    |             |             |
| Thermal correction to Gibbs Free Energy=               | 0.186056                    |             |             |
| Sum of electronic and zero-point Energies=             | -1029.635092                |             |             |
| Sum of electronic and thermal Energies=                | -1029.617599                |             |             |
| Sum of electronic and thermal Enthalpies=              | -1029.616655                |             |             |
| Sum of electronic and thermal Free Energies=           | -1029.681510                |             |             |
| <b>Name of anion</b>                                   |                             | O7-H        |             |
| Cartesian Coordinates optimized at B3LYP/6-311G(d,p)   |                             |             |             |
| C                                                      | -2.53452900                 | -0.13729000 | 1.21752700  |
| C                                                      | -3.28176800                 | -1.21883600 | 0.83922600  |
| C                                                      | -2.08099800                 | -1.28831500 | -1.31479700 |
| H                                                      | -4.02806500                 | -1.62134500 | 1.51439700  |
| C                                                      | -0.80884500                 | 1.59111300  | 0.70410400  |
| C                                                      | 0.65663100                  | 1.09201000  | -1.29878000 |
| C                                                      | 0.07524000                  | 2.18802600  | -0.39184500 |
| O                                                      | -0.39151100                 | 0.26649800  | -1.81714500 |
| O                                                      | -0.88589800                 | 2.18647700  | 1.80833700  |
| C                                                      | 1.78212600                  | 0.29019900  | -0.65895500 |
| C                                                      | 1.65919000                  | -1.06711100 | -0.36084900 |
| C                                                      | 3.00327300                  | 0.91663200  | -0.38203500 |
| C                                                      | 2.71750500                  | -1.77148600 | 0.20947000  |
| H                                                      | 0.73085000                  | -1.58168800 | -0.57102600 |
| C                                                      | 4.06632900                  | 0.22455800  | 0.18633500  |
| H                                                      | 3.13119400                  | 1.96893400  | -0.61755800 |
| C                                                      | 3.92204500                  | -1.12917900 | 0.48811800  |
| H                                                      | 2.59807700                  | -2.82689900 | 0.44119600  |
| O                                                      | 4.99501600                  | -1.77952600 | 1.04954600  |
| H                                                      | 4.73472000                  | -2.68817000 | 1.23080600  |
| C                                                      | -1.34747500                 | -0.20879700 | -0.92737800 |
| C                                                      | -1.53438300                 | 0.43547100  | 0.34040200  |
| O                                                      | -0.66437200                 | 3.13145800  | -1.17760400 |
| H                                                      | -1.44193600                 | 2.66114000  | -1.50045800 |
| H                                                      | -1.90428300                 | -1.75424200 | -2.27707000 |
| O                                                      | -2.72220800                 | 0.43826500  | 2.43021600  |
| H                                                      | -2.08486200                 | 1.19453600  | 2.47750900  |
| H                                                      | 5.00861500                  | 0.71478400  | 0.40135200  |
| C                                                      | -3.11865400                 | -1.85853500 | -0.45488200 |
| O                                                      | -3.79690000                 | -2.83968700 | -0.81468000 |
| H                                                      | 1.05375200                  | 1.59663500  | -2.18522300 |
| H                                                      | 0.87479900                  | 2.75766800  | 0.08274700  |
| Frequency and Energy at B3LYP/6-311G(d,p) in gas phase |                             |             |             |
| Zero-point correction=                                 | 0.235296 (Hartree/Particle) |             |             |
| Thermal correction to Energy=                          | 0.252330                    |             |             |
| Thermal correction to Enthalpy=                        | 0.253274                    |             |             |
| Thermal correction to Gibbs Free Energy=               | 0.189799                    |             |             |
| Sum of electronic and zero-point Energies=             | -1029.657324                |             |             |

|                                                        |                                     |
|--------------------------------------------------------|-------------------------------------|
| Sum of electronic and thermal Energies=                | -1029.640291                        |
| Sum of electronic and thermal Enthalpies=              | -1029.639347                        |
| Sum of electronic and thermal Free Energies=           | -1029.702822                        |
| <b>Name of anion</b>                                   | O4'-H                               |
| Cartesian Coordinates optimized at B3LYP/6-311G(d,p)   |                                     |
| C                                                      | -2.54809700 -0.10643100 1.11501700  |
| C                                                      | -3.18753200 -1.30111400 0.80740400  |
| C                                                      | -1.85081700 -1.48486700 -1.23011000 |
| H                                                      | -3.93713200 -1.70980800 1.47089500  |
| C                                                      | -0.91184900 1.68740300 0.54695000   |
| C                                                      | 0.82402400 1.14703400 -1.22615100   |
| C                                                      | 0.03331700 2.24084600 -0.52187300   |
| O                                                      | -0.30913800 0.18925500 -1.80105700  |
| O                                                      | -1.13674500 2.33922000 1.57860800   |
| C                                                      | 1.88910400 0.43346400 -0.52250800   |
| C                                                      | 2.92369500 -0.16767500 -1.28403200  |
| C                                                      | 1.96026500 0.26399300 0.88398100    |
| C                                                      | 3.94548000 -0.88084800 -0.70904500  |
| H                                                      | 2.89679200 -0.05342800 -2.36756300  |
| C                                                      | 2.97853400 -0.44042100 1.48107400   |
| H                                                      | 1.20440100 0.71390300 1.52198400    |
| C                                                      | 4.04876000 -1.07669900 0.72911100   |
| H                                                      | 4.73092000 -1.32196700 -1.31667200  |
| O                                                      | 4.97745800 -1.71968300 1.26700700   |
| C                                                      | -1.21285400 -0.27920800 -0.93578500 |
| C                                                      | -1.55704400 0.43329500 0.24427500   |
| O                                                      | -0.76418600 2.96767700 -1.46943100  |
| H                                                      | -1.15424600 2.29922400 -2.04714900  |
| H                                                      | -1.55859600 -2.02626800 -2.12291100 |
| O                                                      | -2.88199200 0.54171400 2.24123500   |
| H                                                      | -2.30946000 1.35032000 2.27482400   |
| H                                                      | 3.02081300 -0.54138500 2.56179000   |
| C                                                      | -2.82724900 -1.97380500 -0.36165000 |
| O                                                      | -3.47445200 -3.14945800 -0.61891600 |
| H                                                      | -3.10109100 -3.53041300 -1.42047900 |
| H                                                      | 1.17460500 1.53612000 -2.18230500   |
| H                                                      | 0.69901400 2.96409500 -0.05192200   |
| Frequency and Energy at B3LYP/6-311G(d,p) in gas phase |                                     |
| Zero-point correction=                                 | 0.234318 (Hartree/Particle)         |
| Thermal correction to Energy=                          | 0.251383                            |
| Thermal correction to Enthalpy=                        | 0.252327                            |
| Thermal correction to Gibbs Free Energy=               | 0.189323                            |
| Sum of electronic and zero-point Energies=             | -1029.644080                        |
| Sum of electronic and thermal Energies=                | -1029.627015                        |
| Sum of electronic and thermal Enthalpies=              | -1029.626071                        |
| Sum of electronic and thermal Free Energies=           | -1029.689075                        |
| <b>Name of cationic radical</b>                        |                                     |
| Cartesian Coordinates optimized at B3LYP/6-311G(d,p)   |                                     |
| C                                                      | 2.66110900 -0.02557200 1.06857200   |
| C                                                      | 3.34066300 1.19468000 0.82091700    |
| C                                                      | 1.87553600 1.62823200 -1.06572100   |
| H                                                      | 4.15933000 1.49094600 1.46378600    |
| C                                                      | 0.94834700 -1.72547300 0.44424700   |
| C                                                      | -0.74463900 -0.99633900 -1.30804400 |

|   |             |             |             |
|---|-------------|-------------|-------------|
| C | -0.00919800 | -2.17280700 | -0.66150700 |
| O | 0.21300800  | 0.10976600  | -1.64615900 |
| O | 1.20552200  | -2.44118700 | 1.40917700  |
| C | -1.88335200 | -0.35970000 | -0.56314800 |
| C | -2.88500200 | 0.29035200  | -1.31201000 |
| C | -1.98318700 | -0.35602500 | 0.84140600  |
| C | -3.95343600 | 0.90918900  | -0.69503400 |
| H | -2.82127000 | 0.29807700  | -2.39419800 |
| C | -3.04771000 | 0.25375200  | 1.47376300  |
| H | -1.24528300 | -0.85822000 | 1.45422600  |
| C | -4.04292500 | 0.89649300  | 0.70926700  |
| H | -4.72424200 | 1.39271300  | -1.28552400 |
| O | -5.04490000 | 1.46719000  | 1.38600700  |
| H | -5.68887300 | 1.87400300  | 0.79146800  |
| C | 1.20940600  | 0.40238400  | -0.82219000 |
| C | 1.59743700  | -0.44631200 | 0.23073200  |
| O | 0.71659700  | -2.91883000 | -1.62393200 |
| H | 1.41295600  | -2.37561800 | -2.01204300 |
| H | 1.52508600  | 2.25177400  | -1.87941600 |
| O | 3.05842000  | -0.75346000 | 2.08352100  |
| H | 2.48380000  | -1.56887400 | 2.12381000  |
| H | -3.15001600 | 0.24159200  | 2.55133000  |
| C | 2.95096600  | 2.00449700  | -0.25356200 |
| O | 3.64220600  | 3.13782400  | -0.42602200 |
| H | 3.32595600  | 3.64042100  | -1.18685500 |
| H | -1.06959400 | -1.31771400 | -2.29612200 |
| H | -0.73876000 | -2.86363800 | -0.23732500 |

Frequency and Energy at B3LYP/6-311G(d,p) in gas phase

|                                              |                             |
|----------------------------------------------|-----------------------------|
| Zero-point correction=                       | 0.247249 (Hartree/Particle) |
| Thermal correction to Energy=                | 0.264739                    |
| Thermal correction to Enthalpy=              | 0.265683                    |
| Thermal correction to Gibbs Free Energy=     | 0.200510                    |
| Sum of electronic and zero-point Energies=   | -1029.898406                |
| Sum of electronic and thermal Energies=      | -1029.880915                |
| Sum of electronic and thermal Enthalpies=    | -1029.879971                |
| Sum of electronic and thermal Free Energies= | -1029.945144                |

| Name of compound (2)                                 | Dihydromyricetin |             |             |
|------------------------------------------------------|------------------|-------------|-------------|
| Cartesian Coordinates optimized at B3LYP/6-311G(d,p) |                  |             |             |
| C                                                    | 2.95448900       | -0.03544300 | 1.21481500  |
| C                                                    | 3.72505900       | 1.06903000  | 0.86831500  |
| C                                                    | 3.49610800       | 1.70113600  | -0.35623300 |
| C                                                    | 2.49891300       | 1.27109800  | -1.23859900 |
| H                                                    | 4.49723100       | 1.40821700  | 1.54920800  |
| C                                                    | 1.20127000       | -1.70251100 | 0.63788700  |
| C                                                    | -0.25919700      | -1.11972100 | -1.35330400 |
| C                                                    | 0.28959400       | -2.23535400 | -0.46271300 |
| O                                                    | 0.77180300       | -0.20393000 | -1.76954200 |
| O                                                    | 1.34828300       | -2.36335800 | 1.67608300  |
| O                                                    | 4.22332300       | 2.77719800  | -0.74652000 |
| H                                                    | 4.88098300       | 2.98070900  | -0.07250500 |
| C                                                    | -1.44177900      | -0.38624000 | -0.73031300 |
| C                                                    | -1.39010600      | 0.98073700  | -0.45396800 |
| C                                                    | -2.61522800      | -1.10127000 | -0.47462400 |

|                                                        |                             |             |             |
|--------------------------------------------------------|-----------------------------|-------------|-------------|
| C                                                      | -2.50210700                 | 1.61426200  | 0.09508000  |
| H                                                      | -0.49975000                 | 1.55705800  | -0.67093200 |
| C                                                      | -3.72466700                 | -0.46177800 | 0.07082000  |
| H                                                      | -2.70052400                 | -2.15734500 | -0.70153700 |
| C                                                      | -3.66736100                 | 0.90292000  | 0.36147700  |
| H                                                      | -0.57783100                 | -1.58814600 | -2.28696900 |
| O                                                      | -4.78589500                 | 1.48747400  | 0.89808400  |
| H                                                      | -4.59655900                 | 2.42266300  | 1.04355300  |
| C                                                      | 1.72563700                  | 0.17568300  | -0.88831700 |
| C                                                      | 1.93490200                  | -0.50541800 | 0.33692500  |
| H                                                      | -0.54221400                 | -2.76599000 | 0.00943600  |
| O                                                      | 1.05705200                  | -3.10802700 | -1.29169900 |
| H                                                      | 1.40277100                  | -3.81189300 | -0.73122200 |
| O                                                      | -4.86246200                 | -1.16491300 | 0.31605600  |
| H                                                      | -5.51318800                 | -0.55529500 | 0.68793400  |
| H                                                      | 2.34024900                  | 1.78069600  | -2.17858500 |
| O                                                      | 3.19079100                  | -0.65370200 | 2.37544500  |
| H                                                      | 2.57072100                  | -1.42140900 | 2.42780200  |
| O                                                      | -2.55628900                 | 2.95197900  | 0.40913200  |
| H                                                      | -1.70788800                 | 3.36618400  | 0.22402400  |
| Frequency and Energy at B3LYP/6-311G(d,p) in gas phase |                             |             |             |
| Zero-point correction=                                 | 0.257141 (Hartree/Particle) |             |             |
| Thermal correction to Energy=                          | 0.276962                    |             |             |
| Thermal correction to Enthalpy=                        | 0.277906                    |             |             |
| Thermal correction to Gibbs Free Energy=               | 0.208744                    |             |             |
| Sum of electronic and zero-point Energies=             | -1180.662895                |             |             |
| Sum of electronic and thermal Energies=                | -1180.643075                |             |             |
| Sum of electronic and thermal Enthalpies=              | -1180.642130                |             |             |
| Sum of electronic and thermal Free Energies=           | -1180.711292                |             |             |
| <b>Name of radical</b>                                 | C3-H                        |             |             |
| Cartesian Coordinates optimized at B3LYP/6-311G(d,p)   |                             |             |             |
| C                                                      | -3.43062100                 | 0.15272200  | 0.72961200  |
| C                                                      | -4.05832100                 | -1.05883700 | 0.45327900  |
| C                                                      | -3.51506600                 | -1.90142900 | -0.51905400 |
| C                                                      | -2.34985100                 | -1.56870100 | -1.22061800 |
| H                                                      | -4.96503100                 | -1.31694000 | 0.98836200  |
| C                                                      | -1.59227700                 | 1.77590300  | 0.29242800  |
| C                                                      | 0.29503500                  | 0.98331500  | -1.26404500 |
| C                                                      | -0.37193500                 | 2.00334200  | -0.40026800 |
| O                                                      | -0.62902200                 | -0.05115200 | -1.68108500 |
| O                                                      | -2.02500100                 | 2.66898400  | 1.07969200  |
| O                                                      | -4.08793700                 | -3.09255300 | -0.83107900 |
| H                                                      | -4.87781000                 | -3.21714000 | -0.29402200 |
| C                                                      | 1.52886000                  | 0.37352000  | -0.61457300 |
| C                                                      | 1.42467400                  | -0.30572000 | 0.60550000  |
| C                                                      | 2.76182200                  | 0.48785400  | -1.25066700 |
| C                                                      | 2.56088100                  | -0.87235600 | 1.16793700  |
| H                                                      | 0.46949600                  | -0.40031600 | 1.11063600  |
| C                                                      | 3.90194800                  | -0.07302000 | -0.67567400 |
| H                                                      | 2.86226300                  | 1.00718600  | -2.19581500 |
| C                                                      | 3.79969500                  | -0.75669800 | 0.53557200  |
| H                                                      | 0.60776100                  | 1.46506700  | -2.19510800 |
| O                                                      | 4.94381600                  | -1.29638300 | 1.06086300  |
| H                                                      | 4.71719000                  | -1.73996100 | 1.88780300  |



|                                                        |                             |             |             |
|--------------------------------------------------------|-----------------------------|-------------|-------------|
| C                                                      | -1.72657100                 | -0.36472100 | -0.93988100 |
| C                                                      | -2.24342300                 | 0.51242700  | 0.04180100  |
| O                                                      | 0.25379500                  | 3.16218600  | -0.21054400 |
| H                                                      | -0.31349300                 | 3.64819500  | 0.42363800  |
| O                                                      | 5.10445100                  | 0.04252900  | -1.29881100 |
| H                                                      | 5.76480900                  | -0.41003600 | -0.75804700 |
| H                                                      | -1.95048100                 | -2.23551800 | -1.97150800 |
| O                                                      | -3.96069900                 | 0.97202400  | 1.64834800  |
| H                                                      | -3.40625300                 | 1.78942200  | 1.66864700  |
| O                                                      | 2.58590900                  | -1.56772700 | 2.35295400  |
| H                                                      | 1.69993700                  | -1.61882500 | 2.72462600  |
| Frequency and Energy at B3LYP/6-311G(d,p) in gas phase |                             |             |             |
| Zero-point correction=                                 | 0.244637 (Hartree/Particle) |             |             |
| Thermal correction to Energy=                          | 0.264327                    |             |             |
| Thermal correction to Enthalpy=                        | 0.265271                    |             |             |
| Thermal correction to Gibbs Free Energy=               | 0.194928                    |             |             |
| Sum of electronic and zero-point Energies=             | -1180.049653                |             |             |
| Sum of electronic and thermal Energies=                | -1180.029963                |             |             |
| Sum of electronic and thermal Enthalpies=              | -1180.029019                |             |             |
| Sum of electronic and thermal Free Energies=           | -1180.099363                |             |             |
| <b>Name of radical</b>                                 |                             | O4'-H       |             |
| Cartesian Coordinates optimized at B3LYP/6-311G(d,p)   |                             |             |             |
| C                                                      | -2.94407400                 | 0.07879900  | 1.19478300  |
| C                                                      | -3.72867800                 | -1.01465400 | 0.84481900  |
| C                                                      | -3.49329700                 | -1.66087400 | -0.37074600 |
| C                                                      | -2.47475400                 | -1.25503000 | -1.24210200 |
| H                                                      | -4.51656900                 | -1.33451900 | 1.51688200  |
| C                                                      | -1.15282700                 | 1.70938700  | 0.63144800  |
| C                                                      | 0.32324300                  | 1.08413100  | -1.33746400 |
| C                                                      | -0.21192000                 | 2.21772500  | -0.45711900 |
| O                                                      | -0.71252300                 | 0.18354500  | -1.75910000 |
| O                                                      | -1.30153900                 | 2.38175900  | 1.66130900  |
| O                                                      | -4.23158200                 | -2.72590500 | -0.76464200 |
| H                                                      | -4.90187200                 | -2.91756500 | -0.09943100 |
| C                                                      | 1.49562100                  | 0.34471300  | -0.70801000 |
| C                                                      | 1.40810600                  | -1.02263800 | -0.39594200 |
| C                                                      | 2.68462300                  | 1.06225200  | -0.48716200 |
| C                                                      | 2.48143900                  | -1.69421200 | 0.16258800  |
| H                                                      | 0.49253500                  | -1.56337500 | -0.60154200 |
| C                                                      | 3.76983900                  | 0.41561700  | 0.06400900  |
| H                                                      | 2.77076900                  | 2.10939600  | -0.75162000 |
| C                                                      | 3.72965300                  | -1.00099400 | 0.42567800  |
| H                                                      | 0.66336000                  | 1.54543000  | -2.26813400 |
| O                                                      | 4.75000000                  | -1.52307800 | 0.92108200  |
| C                                                      | -1.68948400                 | -0.17142400 | -0.88816900 |
| C                                                      | -1.90257000                 | 0.52364200  | 0.32838100  |
| H                                                      | 0.62385800                  | 2.73115100  | 0.02739400  |
| O                                                      | -0.94181100                 | 3.10089800  | -1.30549200 |
| H                                                      | -1.28774600                 | 3.81391500  | -0.75655300 |
| O                                                      | 4.93080400                  | 1.03005700  | 0.30114500  |
| H                                                      | 5.50499900                  | 0.33630500  | 0.68555300  |
| H                                                      | -2.31159400                 | -1.77504300 | -2.17557100 |
| O                                                      | -3.18725600                 | 0.70943700  | 2.34605400  |
| H                                                      | -2.55564000                 | 1.46684300  | 2.40518600  |

|                                                        |                             |             |             |
|--------------------------------------------------------|-----------------------------|-------------|-------------|
| O                                                      | 2.46286900                  | -2.99930300 | 0.49226700  |
| H                                                      | 1.59667300                  | -3.37044700 | 0.28690400  |
| Frequency and Energy at B3LYP/6-311G(d,p) in gas phase |                             |             |             |
| Zero-point correction=                                 | 0.245446 (Hartree/Particle) |             |             |
| Thermal correction to Energy=                          | 0.264444                    |             |             |
| Thermal correction to Enthalpy=                        | 0.265388                    |             |             |
| Thermal correction to Gibbs Free Energy=               | 0.197017                    |             |             |
| Sum of electronic and zero-point Energies=             | -1180.043581                |             |             |
| Sum of electronic and thermal Energies=                | -1180.024584                |             |             |
| Sum of electronic and thermal Enthalpies=              | -1180.023640                |             |             |
| Sum of electronic and thermal Free Energies=           | -1180.092010                |             |             |
| <b>Name of anion</b>                                   | C3-H                        |             |             |
| Cartesian Coordinates optimized at B3LYP/6-311G(d,p)   |                             |             |             |
| C                                                      | 3.30092300                  | -0.33836200 | 0.89479500  |
| C                                                      | 4.00412000                  | 0.86726400  | 0.74029400  |
| C                                                      | 3.58787700                  | 1.78557200  | -0.22128700 |
| C                                                      | 2.47963900                  | 1.54316400  | -1.03383800 |
| H                                                      | 4.87453100                  | 1.05231300  | 1.36362200  |
| C                                                      | 1.44594900                  | -1.87124400 | 0.21828200  |
| C                                                      | -0.24657600                 | -0.90707000 | -1.37651100 |
| C                                                      | 0.33013200                  | -2.00475200 | -0.54017000 |
| O                                                      | 0.72751200                  | 0.10808900  | -1.70489900 |
| O                                                      | 1.89816500                  | -2.81066600 | 1.02132200  |
| O                                                      | 4.25670900                  | 2.98334600  | -0.40723100 |
| H                                                      | 4.99167500                  | 2.99693300  | 0.21307200  |
| C                                                      | -1.48437900                 | -0.25546300 | -0.74185800 |
| C                                                      | -1.45327800                 | 1.06952700  | -0.30135400 |
| C                                                      | -2.65770800                 | -1.00440400 | -0.60048700 |
| C                                                      | -2.57882200                 | 1.62271700  | 0.29761600  |
| H                                                      | -0.55531400                 | 1.66271200  | -0.42634600 |
| C                                                      | -3.78091900                 | -0.43901700 | -0.00614600 |
| H                                                      | -2.68919200                 | -2.04030900 | -0.91209200 |
| C                                                      | -3.74424200                 | 0.88105100  | 0.44517400  |
| H                                                      | -0.56243300                 | -1.31357400 | -2.34932600 |
| O                                                      | -4.88258400                 | 1.40323100  | 1.03618900  |
| H                                                      | -4.64982300                 | 2.28228000  | 1.35796200  |
| C                                                      | 1.78884600                  | 0.34161300  | -0.86323200 |
| C                                                      | 2.16622900                  | -0.59546700 | 0.09777100  |
| O                                                      | -0.41443700                 | -3.18155800 | -0.49204300 |
| H                                                      | 0.06843900                  | -3.69368700 | 0.17900200  |
| O                                                      | -4.93174400                 | -1.17012500 | 0.14391200  |
| H                                                      | -5.56322700                 | -0.60472700 | 0.60544900  |
| H                                                      | 2.17942100                  | 2.25531900  | -1.79142800 |
| O                                                      | 3.69683200                  | -1.25549500 | 1.78821100  |
| H                                                      | 3.03753100                  | -2.04982100 | 1.63279000  |
| O                                                      | -2.64151400                 | 2.92286800  | 0.77550900  |
| H                                                      | -1.74987900                 | 3.28427400  | 0.78523700  |
| Frequency and Energy at B3LYP/6-311G(d,p) in gas phase |                             |             |             |
| Zero-point correction=                                 | 0.241209 (Hartree/Particle) |             |             |
| Thermal correction to Energy=                          | 0.261174                    |             |             |
| Thermal correction to Enthalpy=                        | 0.262118                    |             |             |
| Thermal correction to Gibbs Free Energy=               | 0.192237                    |             |             |
| Sum of electronic and zero-point Energies=             | -1180.116646                |             |             |
| Sum of electronic and thermal Energies=                | -1180.096681                |             |             |

|                                                        |             |             |             |                             |
|--------------------------------------------------------|-------------|-------------|-------------|-----------------------------|
| Sum of electronic and thermal Enthalpies=              |             |             |             | -1180.095737                |
| Sum of electronic and thermal Free Energies=           |             |             |             | -1180.165618                |
| <b>Name of anion</b>                                   |             |             | O4'-H       |                             |
| Cartesian Coordinates optimized at B3LYP/6-311G(d,p)   |             |             |             |                             |
| C                                                      | 3.07880200  | 0.08615400  | 0.99945100  |                             |
| C                                                      | 3.64982400  | 1.33492700  | 0.79555200  |                             |
| C                                                      | 3.18600100  | 2.12780700  | -0.26215700 |                             |
| C                                                      | 2.16905400  | 1.70978800  | -1.11390200 |                             |
| H                                                      | 4.44387000  | 1.66978800  | 1.45395100  |                             |
| C                                                      | 1.48594200  | -1.68938600 | 0.31503900  |                             |
| C                                                      | -0.31088200 | -1.03534200 | -1.38366000 |                             |
| C                                                      | 0.46324100  | -2.16111200 | -0.71082600 |                             |
| O                                                      | 0.63946900  | 0.07565800  | -1.76707600 |                             |
| O                                                      | 1.86714900  | -2.49379600 | 1.18874700  |                             |
| O                                                      | 3.72301200  | 3.36127900  | -0.49647600 |                             |
| H                                                      | 4.37451200  | 3.54449300  | 0.18802200  |                             |
| C                                                      | -1.49696400 | -0.51816300 | -0.64756400 |                             |
| C                                                      | -1.56334900 | -0.47002100 | 0.76280900  |                             |
| C                                                      | -2.57514100 | -0.00700400 | -1.40114300 |                             |
| C                                                      | -2.67672900 | 0.06739200  | 1.38469700  |                             |
| H                                                      | -0.76467400 | -0.85521800 | 1.38762700  |                             |
| C                                                      | -3.67966500 | 0.53077000  | -0.76673300 |                             |
| H                                                      | -2.54466300 | -0.03071200 | -2.48657300 |                             |
| C                                                      | -3.77575600 | 0.59430400  | 0.65090300  |                             |
| H                                                      | -0.60583200 | -1.38856600 | -2.37157000 |                             |
| O                                                      | -4.81204400 | 1.08098900  | 1.23905500  |                             |
| C                                                      | 1.58754900  | 0.45684400  | -0.91573100 |                             |
| C                                                      | 2.03386500  | -0.37718200 | 0.14819300  |                             |
| H                                                      | -0.24698800 | -2.82195100 | -0.20560500 |                             |
| O                                                      | 1.18889400  | -2.88032500 | -1.72332800 |                             |
| H                                                      | 1.67963200  | -3.57073500 | -1.26339700 |                             |
| O                                                      | -4.76824500 | 1.02786300  | -1.43998700 |                             |
| H                                                      | -5.34177400 | 1.30449900  | -0.69668400 |                             |
| H                                                      | 1.81618300  | 2.34974600  | -1.91007800 |                             |
| O                                                      | 3.53122000  | -0.68548800 | 1.99908800  |                             |
| H                                                      | 3.01388300  | -1.53069000 | 1.95182900  |                             |
| O                                                      | -2.81714000 | 0.12465000  | 2.74869600  |                             |
| H                                                      | -3.69742700 | 0.54403800  | 2.83314200  |                             |
| Frequency and Energy at B3LYP/6-311G(d,p) in gas phase |             |             |             |                             |
| Zero-point correction=                                 |             |             |             | 0.244264 (Hartree/Particle) |
| Thermal correction to Energy=                          |             |             |             | 0.263300                    |
| Thermal correction to Enthalpy=                        |             |             |             | 0.264244                    |
| Thermal correction to Gibbs Free Energy=               |             |             |             | 0.196454                    |
| Sum of electronic and zero-point Energies=             |             |             |             | -1180.141513                |
| Sum of electronic and thermal Energies=                |             |             |             | -1180.122477                |
| Sum of electronic and thermal Enthalpies=              |             |             |             | -1180.121533                |
| Sum of electronic and thermal Free Energies=           |             |             |             | -1180.189322                |
| <b>Name of anion</b>                                   |             |             | O7-H        |                             |
| Cartesian Coordinates optimized at B3LYP/6-311G(d,p)   |             |             |             |                             |
| C                                                      | 4.06027700  | -0.43858400 | 0.02742700  |                             |
| C                                                      | 4.72741200  | 0.74325100  | -0.15597200 |                             |
| C                                                      | 4.04960000  | 2.02011900  | -0.30673900 |                             |
| C                                                      | 2.59933500  | 1.93722800  | -0.27420900 |                             |
| H                                                      | 5.81484500  | 0.76061800  | -0.19616400 |                             |

|                                                        |                             |             |             |
|--------------------------------------------------------|-----------------------------|-------------|-------------|
| C                                                      | 1.87799800                  | -1.68485700 | 0.36152400  |
| C                                                      | -0.15372100                 | -0.38324000 | -0.35307000 |
| C                                                      | 0.35347800                  | -1.49430800 | 0.56971700  |
| O                                                      | 0.56790500                  | 0.81019200  | -0.04624800 |
| O                                                      | 2.27212200                  | -2.85919100 | 0.43878800  |
| O                                                      | 4.66338500                  | 3.09294100  | -0.46944400 |
| C                                                      | -1.63453200                 | -0.07813500 | -0.22137700 |
| C                                                      | -2.05868900                 | 1.14969500  | 0.29332900  |
| C                                                      | -2.58055500                 | -1.02630700 | -0.62317400 |
| C                                                      | -3.41807500                 | 1.41745300  | 0.40183700  |
| H                                                      | -1.32184500                 | 1.88512600  | 0.59189000  |
| C                                                      | -3.93858700                 | -0.74815600 | -0.50905300 |
| H                                                      | -2.26654500                 | -1.99288400 | -0.99212500 |
| C                                                      | -4.36198000                 | 0.47909500  | 0.00335200  |
| H                                                      | 0.05934100                  | -0.68184200 | -1.39004000 |
| O                                                      | -5.72125000                 | 0.71376500  | 0.09296600  |
| H                                                      | -5.83205700                 | 1.59826000  | 0.46130900  |
| C                                                      | 1.95079300                  | 0.75190500  | -0.08001600 |
| C                                                      | 2.62695600                  | -0.50347100 | 0.09889700  |
| H                                                      | 0.18394800                  | -1.16724800 | 1.60878700  |
| O                                                      | -0.28113600                 | -2.72860500 | 0.32669000  |
| H                                                      | 0.48258300                  | -3.34390000 | 0.33389600  |
| O                                                      | -4.86962900                 | -1.67325900 | -0.90066500 |
| H                                                      | -5.73838100                 | -1.28826800 | -0.73190700 |
| H                                                      | 2.03057800                  | 2.84700700  | -0.42548800 |
| O                                                      | 4.74550900                  | -1.61641800 | 0.17495800  |
| H                                                      | 5.68097800                  | -1.39027500 | 0.13590000  |
| O                                                      | -3.93748800                 | 2.60297000  | 0.89335400  |
| H                                                      | -3.20704700                 | 3.18412400  | 1.12591900  |
| Frequency and Energy at B3LYP/6-311G(d,p) in gas phase |                             |             |             |
| Zero-point correction=                                 | 0.243114 (Hartree/Particle) |             |             |
| Thermal correction to Energy=                          | 0.262885                    |             |             |
| Thermal correction to Enthalpy=                        | 0.263829                    |             |             |
| Thermal correction to Gibbs Free Energy=               | 0.194772                    |             |             |
| Sum of electronic and zero-point Energies=             | -1180.131212                |             |             |
| Sum of electronic and thermal Energies=                | -1180.111441                |             |             |
| Sum of electronic and thermal Enthalpies=              | -1180.110496                |             |             |
| Sum of electronic and thermal Free Energies=           | -1180.179554                |             |             |
| <b>Name of cationic radical</b>                        |                             |             |             |
| Cartesian Coordinates optimized at B3LYP/6-311G(d,p)   |                             |             |             |
| C                                                      | 3.09880700                  | -0.03283500 | 1.13304100  |
| C                                                      | 3.93034600                  | 0.99851600  | 0.66049600  |
| C                                                      | 3.66711300                  | 1.58696200  | -0.57997400 |
| C                                                      | 2.56654200                  | 1.18369100  | -1.34962000 |
| H                                                      | 4.77486200                  | 1.30064600  | 1.26868200  |
| C                                                      | 1.20604200                  | -1.60761200 | 0.78581500  |
| C                                                      | -0.29902000                 | -1.10020300 | -1.19882100 |
| C                                                      | 0.25905200                  | -2.18236600 | -0.26547400 |
| O                                                      | 0.69071600                  | -0.15475000 | -1.64850200 |
| O                                                      | 1.35026700                  | -2.17369700 | 1.87032200  |
| O                                                      | 4.42354600                  | 2.56895800  | -1.09486100 |
| H                                                      | 5.16948400                  | 2.77419300  | -0.51814600 |
| C                                                      | -1.50957900                 | -0.36916500 | -0.65551200 |
| C                                                      | -1.41118600                 | 0.94984000  | -0.15627700 |

|                                                        |                             |             |             |
|--------------------------------------------------------|-----------------------------|-------------|-------------|
| C                                                      | -2.73787100                 | -1.03462500 | -0.69144000 |
| C                                                      | -2.53444900                 | 1.57285500  | 0.34533200  |
| H                                                      | -0.46639300                 | 1.47649100  | -0.17340700 |
| C                                                      | -3.87557900                 | -0.42433600 | -0.18438600 |
| H                                                      | -2.82976000                 | -2.03269800 | -1.10151100 |
| C                                                      | -3.77729400                 | 0.89611200  | 0.34051100  |
| H                                                      | -0.59550800                 | -1.61517000 | -2.11649500 |
| O                                                      | -4.89395500                 | 1.45183400  | 0.80889900  |
| H                                                      | -4.71610700                 | 2.34922900  | 1.13527200  |
| C                                                      | 1.74276000                  | 0.15846400  | -0.87328000 |
| C                                                      | 1.99142200                  | -0.47590300 | 0.36381500  |
| H                                                      | -0.56950700                 | -2.68642800 | 0.24245200  |
| O                                                      | 1.00147300                  | -3.06745000 | -1.08943700 |
| H                                                      | 1.29961400                  | -3.81513300 | -0.55745900 |
| O                                                      | -5.04634500                 | -1.06272700 | -0.19241100 |
| H                                                      | -5.74267200                 | -0.51060600 | 0.19321300  |
| H                                                      | 2.36101700                  | 1.65344800  | -2.30162800 |
| O                                                      | 3.38737300                  | -0.58211800 | 2.29997800  |
| H                                                      | 2.72406800                  | -1.29562900 | 2.47909100  |
| O                                                      | -2.60719400                 | 2.82081000  | 0.86659700  |
| H                                                      | -1.75878300                 | 3.27838500  | 0.83990700  |
| Frequency and Energy at B3LYP/6-311G(d,p) in gas phase |                             |             |             |
| Zero-point correction=                                 | 0.256219 (Hartree/Particle) |             |             |
| Thermal correction to Energy=                          | 0.275914                    |             |             |
| Thermal correction to Enthalpy=                        | 0.276858                    |             |             |
| Thermal correction to Gibbs Free Energy=               | 0.206914                    |             |             |
| Sum of electronic and zero-point Energies=             | -1180.389697                |             |             |
| Sum of electronic and thermal Energies=                | -1180.370002                |             |             |
| Sum of electronic and thermal Enthalpies=              | -1180.369058                |             |             |
| Sum of electronic and thermal Free Energies=           | -1180.439002                |             |             |

| Name of compound (3)                                 | Kaempferol  |             |             |
|------------------------------------------------------|-------------|-------------|-------------|
| Cartesian Coordinates optimized at B3LYP/6-311G(d,p) |             |             |             |
| O                                                    | -0.08738100 | -0.79878200 | -0.00002400 |
| O                                                    | 0.79482200  | 2.72780500  | -0.00002700 |
| O                                                    | -4.19202800 | 1.67639100  | 0.00002400  |
| O                                                    | -1.82237600 | 2.86039100  | 0.00000500  |
| O                                                    | -4.17887100 | -3.09038200 | 0.00000600  |
| O                                                    | 6.16874300  | -1.06104800 | 0.00002800  |
| C                                                    | -2.10545400 | 0.49628800  | 0.00000200  |
| C                                                    | -1.44453700 | -0.74362500 | -0.00000900 |
| C                                                    | 0.70323600  | 0.32623100  | -0.00001900 |
| C                                                    | -1.33375500 | 1.70356500  | -0.00000500 |
| C                                                    | 0.10897800  | 1.55801300  | -0.00001800 |
| C                                                    | 2.13001100  | 0.00352800  | -0.00001200 |
| C                                                    | -3.52743600 | 0.51428600  | 0.00001400  |
| C                                                    | -2.13452200 | -1.94771100 | -0.00000700 |
| C                                                    | -3.52840400 | -1.89870700 | 0.00000500  |
| C                                                    | -4.22836600 | -0.68348100 | 0.00001500  |
| C                                                    | 3.12193800  | 1.00095500  | 0.00000800  |
| C                                                    | 2.54962800  | -1.34188800 | -0.00002500 |
| C                                                    | 4.46843200  | 0.66488800  | 0.00002400  |
| C                                                    | 3.89169100  | -1.67844500 | -0.00001300 |
| C                                                    | 4.86376800  | -0.67443700 | 0.00001300  |

|                                                        |                             |             |             |
|--------------------------------------------------------|-----------------------------|-------------|-------------|
| H                                                      | -1.61413600                 | -2.89469100 | -0.00001500 |
| H                                                      | -5.31223100                 | -0.65781900 | 0.00002400  |
| H                                                      | 2.83753200                  | 2.04170500  | 0.00001600  |
| H                                                      | 1.80909000                  | -2.12907700 | -0.00004400 |
| H                                                      | 5.21720400                  | 1.45167800  | 0.00004200  |
| H                                                      | 4.20886800                  | -2.71399100 | -0.00002200 |
| H                                                      | 0.09535600                  | 3.40989400  | -0.00002500 |
| H                                                      | -3.52045700                 | 2.39935100  | 0.00002100  |
| H                                                      | -5.12983100                 | -2.93754100 | 0.00001500  |
| H                                                      | 6.73409500                  | -0.28127400 | 0.00005200  |
| Frequency and Energy at B3LYP/6-311G(d,p) in gas phase |                             |             |             |
| Zero-point correction=                                 | 0.225588 (Hartree/Particle) |             |             |
| Thermal correction to Energy=                          | 0.242263                    |             |             |
| Thermal correction to Enthalpy=                        | 0.243207                    |             |             |
| Thermal correction to Gibbs Free Energy=               | 0.181008                    |             |             |
| Sum of electronic and zero-point Energies=             | -1029.017202                |             |             |
| Sum of electronic and thermal Energies=                | -1029.000527                |             |             |
| Sum of electronic and thermal Enthalpies=              | -1028.999583                |             |             |
| Sum of electronic and thermal Free Energies=           | -1029.061782                |             |             |
| <b>Name of radical</b>                                 |                             | O3-H        |             |
| Cartesian Coordinates optimized at B3LYP/6-311G(d,p)   |                             |             |             |
| C                                                      | -3.54341700                 | 0.50276100  | 0.00001900  |
| C                                                      | -4.22251200                 | -0.71080900 | 0.00000100  |
| C                                                      | -2.09696800                 | -1.91462000 | -0.00000200 |
| H                                                      | -5.30362500                 | -0.72894900 | 0.00000000  |
| C                                                      | -1.38854100                 | 1.77382600  | -0.00001000 |
| C                                                      | 0.71816700                  | 0.36415900  | 0.00000300  |
| C                                                      | 0.12664700                  | 1.68677100  | -0.00001500 |
| O                                                      | -0.07015900                 | -0.74654400 | 0.00001100  |
| O                                                      | -1.94345600                 | 2.87623400  | -0.00003600 |
| C                                                      | 2.12696300                  | 0.05257800  | 0.00000500  |
| C                                                      | 2.55098900                  | -1.29755100 | 0.00000100  |
| C                                                      | 3.12881900                  | 1.05625800  | 0.00001000  |
| C                                                      | 3.89265400                  | -1.62812100 | 0.00000100  |
| H                                                      | 1.81250800                  | -2.08639700 | -0.00000300 |
| C                                                      | 4.46879800                  | 0.72343700  | 0.00001100  |
| H                                                      | 2.82752100                  | 2.09216400  | 0.00001200  |
| C                                                      | 4.86459900                  | -0.61905400 | 0.00000600  |
| H                                                      | 4.19421800                  | -2.67147000 | -0.00000300 |
| O                                                      | 6.19453500                  | -0.88178700 | 0.00000600  |
| H                                                      | 6.33889000                  | -1.83447800 | 0.00000000  |
| C                                                      | -1.43566900                 | -0.69733800 | 0.00000700  |
| C                                                      | -2.11576500                 | 0.52693900  | 0.00000800  |
| O                                                      | 0.79291900                  | 2.72704400  | -0.00004000 |
| H                                                      | -1.53199300                 | -2.83872500 | -0.00001000 |
| O                                                      | -4.23463100                 | 1.64192000  | 0.00007200  |
| H                                                      | -3.57503900                 | 2.38162400  | -0.00004500 |
| H                                                      | 5.23206000                  | 1.49161000  | 0.00001500  |
| C                                                      | -3.49911100                 | -1.90329000 | -0.00001000 |
| O                                                      | -4.21750800                 | -3.05322500 | -0.00002900 |
| H                                                      | -3.62205400                 | -3.81019400 | -0.00004100 |
| Frequency and Energy at B3LYP/6-311G(d,p) in gas phase |                             |             |             |
| Zero-point correction=                                 | 0.212461 (Hartree/Particle) |             |             |
| Thermal correction to Energy=                          | 0.229042                    |             |             |

|                                                        |                                     |
|--------------------------------------------------------|-------------------------------------|
| Thermal correction to Enthalpy=                        | 0.229987                            |
| Thermal correction to Gibbs Free Energy=               | 0.167225                            |
| Sum of electronic and zero-point Energies=             | -1028.388147                        |
| Sum of electronic and thermal Energies=                | -1028.371566                        |
| Sum of electronic and thermal Enthalpies=              | -1028.370622                        |
| Sum of electronic and thermal Free Energies=           | -1028.433383                        |
| <b>Name of radical</b>                                 | O4'-H                               |
| Cartesian Coordinates optimized at B3LYP/6-311G(d,p)   |                                     |
| C                                                      | -3.47733100 0.52810200 -0.00005900  |
| C                                                      | -4.18416400 -0.66544700 -0.00010400 |
| C                                                      | -2.09362500 -1.93976400 -0.00006300 |
| H                                                      | -5.26767600 -0.63444300 -0.00013700 |
| C                                                      | -1.27915800 1.70250000 0.00006700   |
| C                                                      | 0.76796000 0.30671600 0.00007900    |
| C                                                      | 0.17077600 1.55161000 0.00015900    |
| O                                                      | -0.04016500 -0.80884900 0.00001000  |
| O                                                      | -1.74920700 2.86474100 0.00010400   |
| C                                                      | 2.17204300 -0.01357100 0.00006600   |
| C                                                      | 2.58285800 -1.38370500 0.00046600   |
| C                                                      | 3.18091700 0.99952500 -0.00041100   |
| C                                                      | 3.90241800 -1.72623100 0.00039700   |
| H                                                      | 1.82404000 -2.15348200 0.00083500   |
| C                                                      | 4.50514900 0.66920000 -0.00049300   |
| H                                                      | 2.88570500 2.03729900 -0.00071900   |
| C                                                      | 4.95391600 -0.71665300 -0.00008300  |
| H                                                      | 4.21948600 -2.76256500 0.00072700   |
| O                                                      | 6.15784500 -1.02091100 -0.00014100  |
| C                                                      | -1.39728300 -0.74264600 -0.00001900 |
| C                                                      | -2.05379100 0.50265000 -0.00000800  |
| O                                                      | 0.84623000 2.71244800 0.00028300    |
| H                                                      | 0.14559700 3.39752900 0.00043700    |
| H                                                      | -1.57988700 -2.89030300 -0.00006700 |
| O                                                      | -4.13713700 1.69137500 -0.00005900  |
| H                                                      | -3.47025700 2.41583500 0.00000500   |
| H                                                      | 5.27556000 1.43132400 -0.00086400   |
| C                                                      | -3.48954200 -1.88347000 -0.00009900 |
| O                                                      | -4.14091800 -3.07053400 -0.00012800 |
| H                                                      | -5.09260900 -2.92023900 -0.00014100 |
| Frequency and Energy at B3LYP/6-311G(d,p) in gas phase |                                     |
| Zero-point correction=                                 | 0.212600 (Hartree/Particle)         |
| Thermal correction to Energy=                          | 0.228993                            |
| Thermal correction to Enthalpy=                        | 0.229938                            |
| Thermal correction to Gibbs Free Energy=               | 0.167670                            |
| Sum of electronic and zero-point Energies=             | -1028.388635                        |
| Sum of electronic and thermal Energies=                | -1028.372241                        |
| Sum of electronic and thermal Enthalpies=              | -1028.371297                        |
| Sum of electronic and thermal Free Energies=           | -1028.433565                        |
| <b>Name of anion</b>                                   | O3'-H                               |
| Cartesian Coordinates optimized at B3LYP/6-311G(d,p)   |                                     |
| C                                                      | -3.52662500 0.51539500 0.00012400   |
| C                                                      | -4.23076400 -0.68222900 0.00008600  |
| C                                                      | -2.13531300 -1.93163900 -0.00007800 |
| H                                                      | -5.31262400 -0.68105500 0.00014300  |
| C                                                      | -1.35259800 1.76016500 -0.00009800  |

|                                                        |                             |             |             |
|--------------------------------------------------------|-----------------------------|-------------|-------------|
| C                                                      | 0.70013300                  | 0.38189600  | -0.00003500 |
| C                                                      | 0.14768100                  | 1.68901100  | -0.00004900 |
| O                                                      | -0.09783300                 | -0.77368400 | -0.00008900 |
| O                                                      | -1.94597800                 | 2.86391900  | -0.00023300 |
| C                                                      | 2.10974500                  | 0.04472700  | -0.00000800 |
| C                                                      | 2.54766500                  | -1.29877700 | -0.00001100 |
| C                                                      | 3.11678300                  | 1.04301200  | 0.00002300  |
| C                                                      | 3.89978100                  | -1.62469900 | 0.00001400  |
| H                                                      | 1.81408100                  | -2.09348200 | -0.00003500 |
| C                                                      | 4.46464700                  | 0.71102400  | 0.00004800  |
| H                                                      | 2.79260900                  | 2.07454100  | 0.00002600  |
| C                                                      | 4.86907800                  | -0.62316400 | 0.00004400  |
| H                                                      | 4.20189100                  | -2.67096700 | 0.00001100  |
| O                                                      | 6.22539200                  | -0.90104900 | 0.00007100  |
| H                                                      | 6.32641800                  | -1.85760400 | 0.00007400  |
| C                                                      | -1.42987300                 | -0.71693300 | -0.00004200 |
| C                                                      | -2.09646600                 | 0.51742100  | 0.00004800  |
| O                                                      | 0.81006000                  | 2.75435600  | -0.00003200 |
| H                                                      | -1.58703600                 | -2.86758000 | -0.00014600 |
| O                                                      | -4.18274400                 | 1.68236000  | 0.00023000  |
| H                                                      | -3.45470100                 | 2.38360400  | 0.00045100  |
| H                                                      | 5.22279500                  | 1.48705300  | 0.00007200  |
| C                                                      | -3.52222200                 | -1.89119600 | -0.00001900 |
| O                                                      | -4.27240700                 | -3.04436400 | -0.00004400 |
| H                                                      | -3.66527400                 | -3.79088700 | -0.00009600 |
| Frequency and Energy at B3LYP/6-311G(d,p) in gas phase |                             |             |             |
| Zero-point correction=                                 | 0.210458 (Hartree/Particle) |             |             |
| Thermal correction to Energy=                          | 0.227151                    |             |             |
| Thermal correction to Enthalpy=                        | 0.228095                    |             |             |
| Thermal correction to Gibbs Free Energy=               | 0.166194                    |             |             |
| Sum of electronic and zero-point Energies=             | -1028.477277                |             |             |
| Sum of electronic and thermal Energies=                | -1028.460585                |             |             |
| Sum of electronic and thermal Enthalpies=              | -1028.459640                |             |             |
| Sum of electronic and thermal Free Energies=           | -1028.521542                |             |             |
| <b>Name of anion</b>                                   | O4'-H                       |             |             |
| Cartesian Coordinates optimized at B3LYP/6-311G(d,p)   |                             |             |             |
| C                                                      | -3.46755400                 | 0.52490700  | -0.00009300 |
| C                                                      | -4.18577300                 | -0.66869400 | -0.00008100 |
| C                                                      | -2.10699900                 | -1.94873600 | -0.00003800 |
| H                                                      | -5.27038000                 | -0.63216600 | -0.00007400 |
| C                                                      | -1.26294700                 | 1.70184400  | -0.00006300 |
| C                                                      | 0.77271800                  | 0.31056000  | 0.00006200  |
| C                                                      | 0.14265300                  | 1.55780900  | 0.00011600  |
| O                                                      | -0.04930900                 | -0.81056200 | -0.00005900 |
| O                                                      | -1.79290400                 | 2.86612400  | 0.00000000  |
| C                                                      | 2.15689100                  | -0.01016500 | 0.00014200  |
| C                                                      | 2.59347400                  | -1.37320400 | 0.00046700  |
| C                                                      | 3.18402400                  | 0.98713300  | -0.00020900 |
| C                                                      | 3.91609000                  | -1.71266000 | 0.00032300  |
| H                                                      | 1.84406200                  | -2.15552700 | 0.00082700  |
| C                                                      | 4.50986100                  | 0.65516400  | -0.00033200 |
| H                                                      | 2.89506500                  | 2.02829000  | -0.00033900 |
| C                                                      | 4.98437900                  | -0.72115500 | -0.00012700 |
| H                                                      | 4.22325400                  | -2.75452700 | 0.00054300  |



|                                                        |                             |             |             |
|--------------------------------------------------------|-----------------------------|-------------|-------------|
| O                                                      | 6.19315000                  | -1.02728700 | -0.00030200 |
| C                                                      | -1.40182500                 | -0.74548800 | -0.00005600 |
| C                                                      | -2.05292100                 | 0.49205000  | -0.00007800 |
| O                                                      | 0.84461500                  | 2.73666900  | 0.00039300  |
| H                                                      | 0.13461500                  | 3.40532500  | 0.00041000  |
| H                                                      | -1.59016700                 | -2.89811200 | -0.00000800 |
| O                                                      | -4.11053100                 | 1.70499900  | -0.00009400 |
| H                                                      | -3.39027800                 | 2.40010900  | -0.00001100 |
| H                                                      | 5.27257500                  | 1.42841600  | -0.00053100 |
| C                                                      | -3.49725000                 | -1.88809900 | -0.00004900 |
| O                                                      | -4.17384300                 | -3.08206500 | -0.00002200 |
| H                                                      | -5.11709200                 | -2.89242900 | -0.00004600 |
| Frequency and Energy at B3LYP/6-311G(d,p) in gas phase |                             |             |             |
| Zero-point correction=                                 | 0.211526 (Hartree/Particle) |             |             |
| Thermal correction to Energy=                          | 0.228046                    |             |             |
| Thermal correction to Enthalpy=                        | 0.228990                    |             |             |
| Thermal correction to Gibbs Free Energy=               | 0.167304                    |             |             |
| Sum of electronic and zero-point Energies=             | -1028.490912                |             |             |
| Sum of electronic and thermal Energies=                | -1028.474391                |             |             |
| Sum of electronic and thermal Enthalpies=              | -1028.473447                |             |             |
| Sum of electronic and thermal Free Energies=           | -1028.535134                |             |             |
| <b>Name of cationic radical</b>                        |                             |             |             |
| Cartesian Coordinates optimized at B3LYP/6-311G(d,p)   |                             |             |             |
| O                                                      | -0.07233900                 | -0.79629900 | 0.00007000  |
| O                                                      | 0.77391400                  | 2.69355000  | -0.00015000 |
| O                                                      | -4.20615800                 | 1.66016000  | 0.00007800  |
| O                                                      | -1.79947000                 | 2.86940700  | -0.00002200 |
| O                                                      | -4.14075700                 | -3.08542500 | -0.00000500 |
| O                                                      | 6.13580400                  | -1.04236900 | 0.00015300  |
| C                                                      | -2.10767300                 | 0.50541900  | 0.00003000  |
| C                                                      | -1.44418500                 | -0.73674500 | 0.00002100  |
| C                                                      | 0.72989500                  | 0.29212900  | -0.00005600 |
| C                                                      | -1.35306300                 | 1.70686200  | -0.00001500 |
| C                                                      | 0.11233900                  | 1.55613500  | -0.00010200 |
| C                                                      | 2.13065300                  | -0.00295600 | -0.00006000 |
| C                                                      | -3.53911900                 | 0.51615400  | 0.00006300  |
| C                                                      | -2.12182600                 | -1.93161400 | 0.00001100  |
| C                                                      | -3.53762800                 | -1.89202300 | 0.00002000  |
| C                                                      | -4.23992500                 | -0.68613800 | 0.00005600  |
| C                                                      | 3.12538300                  | 1.01465900  | 0.00007800  |
| C                                                      | 2.55932800                  | -1.36237400 | -0.00024800 |
| C                                                      | 4.46149000                  | 0.69181300  | 0.00013500  |
| C                                                      | 3.89022200                  | -1.68557300 | -0.00014700 |
| C                                                      | 4.86174400                  | -0.65971500 | 0.00006200  |
| H                                                      | -1.60679700                 | -2.88179300 | 0.00001000  |
| H                                                      | -5.32296800                 | -0.66028400 | 0.00006900  |
| H                                                      | 2.83934500                  | 2.05442400  | 0.00015300  |
| H                                                      | 1.82120000                  | -2.15123800 | -0.00043200 |
| H                                                      | 5.20901100                  | 1.47766600  | 0.00024300  |
| H                                                      | 4.22441900                  | -2.71507800 | -0.00026400 |
| H                                                      | 0.07895900                  | 3.39625900  | -0.00023400 |
| H                                                      | -3.57340200                 | 2.41200600  | 0.00010500  |
| H                                                      | -5.10221700                 | -2.99383300 | 0.00001000  |

|                                                        |                             |             |            |
|--------------------------------------------------------|-----------------------------|-------------|------------|
| H                                                      | 6.73869000                  | -0.28650700 | 0.00026800 |
| Frequency and Energy at B3LYP/6-311G(d,p) in gas phase |                             |             |            |
| Zero-point correction=                                 | 0.226088 (Hartree/Particle) |             |            |
| Thermal correction to Energy=                          | 0.242625                    |             |            |
| Thermal correction to Enthalpy=                        | 0.243569                    |             |            |
| Thermal correction to Gibbs Free Energy=               | 0.181061                    |             |            |
| Sum of electronic and zero-point Energies=             | -1028.756281                |             |            |
| Sum of electronic and thermal Energies=                | -1028.739744                |             |            |
| Sum of electronic and thermal Enthalpies=              | -1028.738800                |             |            |
| Sum of electronic and thermal Free Energies=           | -1028.801308                |             |            |

| Name of compound (4)                                   | Keto-teracacidin            |             |             |
|--------------------------------------------------------|-----------------------------|-------------|-------------|
| Cartesian Coordinates optimized at B3LYP/6-311G(d,p)   |                             |             |             |
| C                                                      | -2.25762900                 | 0.78511500  | 1.63933100  |
| C                                                      | -3.18735000                 | -0.23798800 | 1.60742900  |
| C                                                      | -3.24627900                 | -1.07112300 | 0.48605800  |
| C                                                      | -2.38471100                 | -0.90065500 | -0.60175200 |
| H                                                      | -2.18282800                 | 1.45313200  | 2.48780100  |
| H                                                      | -3.86938200                 | -0.39888300 | 2.43591500  |
| C                                                      | -0.43289100                 | 2.09483500  | 0.54287400  |
| C                                                      | 0.61875500                  | 0.96544100  | -1.43284700 |
| C                                                      | 0.25745000                  | 2.32328300  | -0.79755200 |
| O                                                      | -0.63798900                 | 0.27248400  | -1.64784500 |
| O                                                      | -0.18659600                 | 2.83327600  | 1.48236300  |
| O                                                      | -2.41835900                 | -1.74107800 | -1.67101800 |
| H                                                      | -3.10728700                 | -2.39685300 | -1.50304200 |
| O                                                      | -4.11811800                 | -2.12052600 | 0.35930800  |
| H                                                      | -4.64747600                 | -2.21063000 | 1.15781100  |
| O                                                      | 1.34352700                  | 3.20182000  | -0.66895000 |
| H                                                      | 1.24553900                  | 3.59010300  | 0.21719800  |
| H                                                      | -0.50671700                 | 2.75997200  | -1.46286800 |
| C                                                      | 1.60391900                  | 0.07089500  | -0.68737800 |
| C                                                      | 1.43683200                  | -1.31698300 | -0.71467600 |
| C                                                      | 2.73657000                  | 0.58711300  | -0.04314900 |
| C                                                      | 2.35315400                  | -2.16325600 | -0.09819700 |
| H                                                      | 0.58171800                  | -1.74425400 | -1.22315100 |
| C                                                      | 3.65591200                  | -0.25165500 | 0.57443900  |
| H                                                      | 2.90048600                  | 1.65507800  | -0.03058100 |
| C                                                      | 3.46753900                  | -1.63352900 | 0.55283600  |
| H                                                      | 2.19964800                  | -3.23845900 | -0.12746500 |
| H                                                      | 4.52793200                  | 0.15022500  | 1.07592200  |
| H                                                      | 0.98475800                  | 1.14936300  | -2.44534700 |
| O                                                      | 4.40091200                  | -2.41189100 | 1.17657400  |
| H                                                      | 4.15652600                  | -3.33788000 | 1.07846800  |
| C                                                      | -1.45310300                 | 0.14150200  | -0.56775700 |
| C                                                      | -1.39315900                 | 0.98974200  | 0.55632200  |
| Frequency and Energy at B3LYP/6-311G(d,p) in gas phase |                             |             |             |
| ero-point correction=                                  | 0.248282 (Hartree/Particle) |             |             |
| Thermal correction to Energy=                          | 0.265733                    |             |             |
| Thermal correction to Enthalpy=                        | 0.266677                    |             |             |
| Thermal correction to Gibbs Free Energy=               | 0.202780                    |             |             |
| Sum of electronic and zero-point Energies=             | -1030.169811                |             |             |
| Sum of electronic and thermal Energies=                | -1030.152360                |             |             |
| Sum of electronic and thermal Enthalpies=              | -1030.151416                |             |             |

|                                                        |             |             |             |                             |
|--------------------------------------------------------|-------------|-------------|-------------|-----------------------------|
| Sum of electronic and thermal Free Energies=           |             |             |             | -1030.215313                |
| <b>Name of radical</b>                                 |             |             | O7-H        |                             |
| Cartesian Coordinates optimized at B3LYP/6-311G(d,p)   |             |             |             |                             |
| C                                                      | -2.29327100 | 0.68859100  | 1.65722500  |                             |
| C                                                      | -3.19133900 | -0.33098600 | 1.68015500  |                             |
| C                                                      | -3.28325500 | -1.22386500 | 0.54835500  |                             |
| C                                                      | -2.37610300 | -0.98260500 | -0.58550600 |                             |
| H                                                      | -2.19817500 | 1.37732000  | 2.48810600  |                             |
| H                                                      | -3.85036800 | -0.50985500 | 2.51975700  |                             |
| C                                                      | -0.51970900 | 2.06568800  | 0.51267900  |                             |
| C                                                      | 0.57938500  | 0.96840300  | -1.45481500 |                             |
| C                                                      | 0.16535300  | 2.31253400  | -0.82726800 |                             |
| O                                                      | -0.66014200 | 0.22808200  | -1.66628300 |                             |
| O                                                      | -0.32072100 | 2.82125700  | 1.44951600  |                             |
| O                                                      | -2.46192400 | -1.83668100 | -1.59361600 |                             |
| H                                                      | -3.17006400 | -2.46067400 | -1.31598900 |                             |
| O                                                      | -4.05246300 | -2.19828000 | 0.44220400  |                             |
| O                                                      | 1.21975400  | 3.22878400  | -0.70693600 |                             |
| H                                                      | 1.09135900  | 3.65464200  | 0.15683700  |                             |
| H                                                      | -0.61525900 | 2.71723600  | -1.49455800 |                             |
| C                                                      | 1.58162700  | 0.10350700  | -0.69970600 |                             |
| C                                                      | 1.52913400  | -1.28686400 | -0.84549800 |                             |
| C                                                      | 2.61321100  | 0.64740900  | 0.07669400  |                             |
| C                                                      | 2.45698400  | -2.11126500 | -0.21909100 |                             |
| H                                                      | 0.75043900  | -1.73342000 | -1.45141200 |                             |
| C                                                      | 3.54511400  | -0.16935000 | 0.70478700  |                             |
| H                                                      | 2.69463600  | 1.71953100  | 0.18096200  |                             |
| C                                                      | 3.47101300  | -1.55500800 | 0.56295700  |                             |
| H                                                      | 2.39198400  | -3.18868700 | -0.34107700 |                             |
| H                                                      | 4.33904600  | 0.25329100  | 1.30825700  |                             |
| H                                                      | 0.93583200  | 1.15577400  | -2.46958000 |                             |
| O                                                      | 4.41003500  | -2.30867600 | 1.20358200  |                             |
| H                                                      | 4.24747300  | -3.24075000 | 1.02503200  |                             |
| C                                                      | -1.46065100 | 0.08302000  | -0.58345200 |                             |
| C                                                      | -1.43302700 | 0.92074000  | 0.53347400  |                             |
| Frequency and Energy at B3LYP/6-311G(d,p) in gas phase |             |             |             |                             |
| ero-point correction=                                  |             |             |             | 0.236271 (Hartree/Particle) |
| Thermal correction to Energy=                          |             |             |             | 0.253150                    |
| Thermal correction to Enthalpy=                        |             |             |             | 0.254095                    |
| Thermal correction to Gibbs Free Energy=               |             |             |             | 0.189885                    |
| Sum of electronic and zero-point Energies=             |             |             |             | -1029.550398                |
| Sum of electronic and thermal Energies=                |             |             |             | -1029.533519                |
| Sum of electronic and thermal Enthalpies=              |             |             |             | -1029.532574                |
| Sum of electronic and thermal Free Energies=           |             |             |             | -1029.596784                |
| <b>Name of radical</b>                                 |             |             | C3-H        |                             |
| Cartesian Coordinates optimized at B3LYP/6-311G(d,p)   |             |             |             |                             |
| C                                                      | 2.74030300  | 0.82115700  | -1.33473200 |                             |
| C                                                      | 3.49696500  | -0.34030500 | -1.34922800 |                             |
| C                                                      | 3.22805300  | -1.34319600 | -0.41729700 |                             |
| C                                                      | 2.20926700  | -1.20374200 | 0.53204500  |                             |
| H                                                      | 2.92519900  | 1.62310000  | -2.03773600 |                             |
| H                                                      | 4.29400600  | -0.47598900 | -2.07322000 |                             |
| C                                                      | 0.91854600  | 2.21357700  | -0.33041600 |                             |
| C                                                      | -0.62047300 | 0.93493500  | 1.28898700  |                             |

|                                                        |                             |             |             |
|--------------------------------------------------------|-----------------------------|-------------|-------------|
| C                                                      | -0.20296900                 | 2.16750600  | 0.55137300  |
| O                                                      | 0.52035100                  | 0.09452000  | 1.53109300  |
| O                                                      | 1.14002700                  | 3.26538100  | -0.96649300 |
| O                                                      | 1.93919400                  | -2.19200300 | 1.42961500  |
| H                                                      | 2.56306300                  | -2.91027600 | 1.26288700  |
| O                                                      | 3.90721000                  | -2.53437700 | -0.34974700 |
| H                                                      | 4.58271600                  | -2.56796900 | -1.03393500 |
| O                                                      | -0.94429000                 | 3.26938900  | 0.66052100  |
| H                                                      | -0.50474600                 | 3.90532200  | 0.05268600  |
| C                                                      | -1.73718000                 | 0.15133200  | 0.58447600  |
| C                                                      | -1.70163700                 | -1.24250400 | 0.54224200  |
| C                                                      | -2.83703200                 | 0.81337900  | 0.02659300  |
| C                                                      | -2.73445800                 | -1.96005600 | -0.05596500 |
| H                                                      | -0.86484400                 | -1.77255500 | 0.97912500  |
| C                                                      | -3.87274400                 | 0.10408000  | -0.56640100 |
| H                                                      | -2.88869300                 | 1.89505600  | 0.05355400  |
| C                                                      | -3.82420900                 | -1.29055200 | -0.61259500 |
| H                                                      | -2.69002600                 | -3.04516100 | -0.08573700 |
| H                                                      | -4.72413100                 | 0.61353900  | -1.00082300 |
| H                                                      | -0.96052500                 | 1.22122900  | 2.28965100  |
| O                                                      | -4.86581600                 | -1.93916200 | -1.21155900 |
| H                                                      | -4.71072800                 | -2.88862800 | -1.17491200 |
| C                                                      | 1.45640600                  | -0.02840100 | 0.54315100  |
| C                                                      | 1.71538000                  | 0.98484900  | -0.39873000 |
| Frequency and Energy at B3LYP/6-311G(d,p) in gas phase |                             |             |             |
| Zero-point correction=                                 | 0.235811 (Hartree/Particle) |             |             |
| Thermal correction to Energy=                          | 0.253256                    |             |             |
| Thermal correction to Enthalpy=                        | 0.254200                    |             |             |
| Thermal correction to Gibbs Free Energy=               | 0.189316                    |             |             |
| Sum of electronic and zero-point Energies=             | -1029.551374                |             |             |
| Sum of electronic and thermal Energies=                | -1029.533929                |             |             |
| Sum of electronic and thermal Enthalpies=              | -1029.532985                |             |             |
| Sum of electronic and thermal Free Energies=           | -1029.597868                |             |             |
| <b>Name of anion</b>                                   | O7-H                        |             |             |
| Cartesian Coordinates optimized at B3LYP/6-311G(d,p)   |                             |             |             |
| C                                                      | 2.33296600                  | 0.72279000  | -1.62092800 |
| C                                                      | 3.20178900                  | -0.34085500 | -1.60853900 |
| C                                                      | 3.24717500                  | -1.24326000 | -0.49164400 |
| C                                                      | 2.33776300                  | -0.96240400 | 0.60595300  |
| H                                                      | 2.28932600                  | 1.40057700  | -2.46690600 |
| H                                                      | 3.86948300                  | -0.54023500 | -2.44031200 |
| C                                                      | 0.56870200                  | 2.10286300  | -0.53806800 |
| C                                                      | -0.57036700                 | 0.99363400  | 1.42635800  |
| C                                                      | -0.19047200                 | 2.33855900  | 0.77729700  |
| O                                                      | 0.65958500                  | 0.30460200  | 1.68864700  |
| O                                                      | 0.33944000                  | 2.90099700  | -1.46266800 |
| O                                                      | 2.37904800                  | -1.88403000 | 1.61526800  |
| H                                                      | 3.07076700                  | -2.49112500 | 1.26595700  |
| O                                                      | 3.98056100                  | -2.26726000 | -0.38744600 |
| O                                                      | -1.27465900                 | 3.21279200  | 0.54715100  |
| H                                                      | -1.08842700                 | 3.52448000  | -0.36218800 |
| H                                                      | 0.51896900                  | 2.80407200  | 1.48048300  |
| C                                                      | -1.56524300                 | 0.10391000  | 0.68303500  |
| C                                                      | -1.34816900                 | -1.27535600 | 0.61515700  |

|                                                        |                             |             |             |
|--------------------------------------------------------|-----------------------------|-------------|-------------|
| C                                                      | -2.75186700                 | 0.61283800  | 0.13893800  |
| C                                                      | -2.27512400                 | -2.11698200 | 0.00547700  |
| H                                                      | -0.44478700                 | -1.69381300 | 1.04032300  |
| C                                                      | -3.68307400                 | -0.22278600 | -0.47030100 |
| H                                                      | -2.93371000                 | 1.67787300  | 0.18504100  |
| C                                                      | -3.44458200                 | -1.59350900 | -0.54196100 |
| H                                                      | -2.07986700                 | -3.18552500 | -0.04706700 |
| H                                                      | -4.59556700                 | 0.17535000  | -0.89935300 |
| H                                                      | -0.97655600                 | 1.19834000  | 2.42264400  |
| O                                                      | -4.39052000                 | -2.38417700 | -1.15495000 |
| H                                                      | -4.06330800                 | -3.28913800 | -1.15942400 |
| C                                                      | 1.49156900                  | 0.11257600  | 0.59208500  |
| C                                                      | 1.46327200                  | 0.99394200  | -0.53739500 |
| Frequency and Energy at B3LYP/6-311G(d,p) in gas phase |                             |             |             |
| Zero-point correction=                                 | 0.235981 (Hartree/Particle) |             |             |
| Thermal correction to Energy=                          | 0.252601                    |             |             |
| Thermal correction to Enthalpy=                        | 0.253546                    |             |             |
| Thermal correction to Gibbs Free Energy=               | 0.191362                    |             |             |
| Sum of electronic and zero-point Energies=             | -1029.657494                |             |             |
| Sum of electronic and thermal Energies=                | -1029.640874                |             |             |
| Sum of electronic and thermal Enthalpies=              | -1029.639929                |             |             |
| Sum of electronic and thermal Free Energies=           | -1029.702114                |             |             |
| <b>Name of anion</b>                                   |                             | C3-H        |             |
| Cartesian Coordinates optimized at B3LYP/6-311G(d,p)   |                             |             |             |
| C                                                      | 2.74396700                  | 0.84932700  | -1.28015400 |
| C                                                      | 3.51033000                  | -0.31485600 | -1.33686900 |
| C                                                      | 3.23595200                  | -1.34846700 | -0.45110200 |
| C                                                      | 2.20876100                  | -1.23945300 | 0.49417400  |
| H                                                      | 2.92467800                  | 1.69146900  | -1.93736800 |
| H                                                      | 4.32720100                  | -0.41601400 | -2.04749800 |
| C                                                      | 0.91839700                  | 2.23344800  | -0.25297900 |
| C                                                      | -0.60131000                 | 0.92135400  | 1.29763900  |
| C                                                      | -0.15173800                 | 2.15667500  | 0.59917700  |
| O                                                      | 0.50938400                  | 0.02369500  | 1.53365400  |
| O                                                      | 1.20290300                  | 3.29643400  | -0.91956000 |
| O                                                      | 1.94279800                  | -2.28540100 | 1.34957100  |
| H                                                      | 2.54529200                  | -2.99116700 | 1.08249100  |
| O                                                      | 3.94162800                  | -2.55923600 | -0.42470000 |
| H                                                      | 4.24555300                  | -2.73985000 | -1.31818800 |
| O                                                      | -0.96509500                 | 3.28594200  | 0.71175700  |
| H                                                      | -0.49084600                 | 3.88336000  | 0.09498200  |
| C                                                      | -1.73830800                 | 0.14845900  | 0.60238500  |
| C                                                      | -1.84526400                 | -1.23804800 | 0.72083100  |
| C                                                      | -2.70540500                 | 0.82767400  | -0.14763100 |
| C                                                      | -2.88675800                 | -1.93202700 | 0.10282400  |
| H                                                      | -1.08981200                 | -1.77867900 | 1.27862400  |
| C                                                      | -3.75834400                 | 0.14658700  | -0.75122900 |
| H                                                      | -2.61610900                 | 1.90239800  | -0.25419600 |
| C                                                      | -3.84894300                 | -1.23953000 | -0.62840100 |
| H                                                      | -2.94464700                 | -3.01585300 | 0.18620700  |
| H                                                      | -4.50731800                 | 0.67206700  | -1.33318700 |
| H                                                      | -0.95393300                 | 1.17242400  | 2.30937900  |
| O                                                      | -4.90227100                 | -1.87793300 | -1.25198600 |
| H                                                      | -4.80466700                 | -2.82266700 | -1.09840900 |

|                                                        |                             |             |             |
|--------------------------------------------------------|-----------------------------|-------------|-------------|
| C                                                      | 1.46053500                  | -0.06391600 | 0.55349600  |
| C                                                      | 1.71309900                  | 0.98852300  | -0.34761700 |
| Frequency and Energy at B3LYP/6-311G(d,p) in gas phase |                             |             |             |
| Zero-point correction=                                 | 0.233380 (Hartree/Particle) |             |             |
| Thermal correction to Energy=                          | 0.251213                    |             |             |
| Thermal correction to Enthalpy=                        | 0.252157                    |             |             |
| Thermal correction to Gibbs Free Energy=               | 0.187172                    |             |             |
| Sum of electronic and zero-point Energies=             | -1029.604323                |             |             |
| Sum of electronic and thermal Energies=                | -1029.586490                |             |             |
| Sum of electronic and thermal Enthalpies=              | -1029.585546                |             |             |
| Sum of electronic and thermal Free Energies=           | -1029.650532                |             |             |
| <b>Name of cationic radical</b>                        |                             |             |             |
| Cartesian Coordinates optimized at B3LYP/6-311G(d,p)   |                             |             |             |
| C                                                      | -2.53558800                 | 0.92134200  | 1.48343200  |
| C                                                      | -3.57542900                 | -0.01103300 | 1.40336200  |
| C                                                      | -3.59939300                 | -0.91899800 | 0.35687200  |
| C                                                      | -2.57270400                 | -0.92053000 | -0.62102300 |
| H                                                      | -2.50827000                 | 1.64454500  | 2.28941900  |
| H                                                      | -4.36264100                 | -0.01655700 | 2.14841600  |
| C                                                      | -0.46003800                 | 1.98469000  | 0.56243700  |
| C                                                      | 0.62529500                  | 0.74367500  | -1.34736600 |
| C                                                      | 0.29893900                  | 2.13465100  | -0.75050100 |
| O                                                      | -0.57469600                 | -0.05627400 | -1.46805100 |
| O                                                      | -0.20610800                 | 2.69973600  | 1.50738900  |
| O                                                      | -2.55671400                 | -1.80651500 | -1.61134000 |
| H                                                      | -3.33584700                 | -2.38227400 | -1.54031200 |
| O                                                      | -4.53377700                 | -1.87300700 | 0.14811000  |
| H                                                      | -5.23153200                 | -1.85367400 | 0.81418300  |
| O                                                      | 1.46496400                  | 2.88298700  | -0.60218800 |
| H                                                      | 1.39571200                  | 3.34290500  | 0.25012000  |
| H                                                      | -0.39812000                 | 2.62335600  | -1.45206300 |
| C                                                      | 1.71430400                  | -0.03900500 | -0.65003100 |
| C                                                      | 1.45378400                  | -1.20279400 | 0.09937700  |
| C                                                      | 3.05242600                  | 0.38966400  | -0.80681000 |
| C                                                      | 2.47842100                  | -1.88372400 | 0.72644800  |
| H                                                      | 0.44596700                  | -1.58428200 | 0.18276800  |
| C                                                      | 4.08104200                  | -0.27398800 | -0.18082700 |
| H                                                      | 3.26227800                  | 1.27219400  | -1.39563300 |
| C                                                      | 3.80295600                  | -1.42161900 | 0.59636500  |
| H                                                      | 2.27016600                  | -2.77619700 | 1.30664800  |
| H                                                      | 5.10829900                  | 0.05608400  | -0.26805200 |
| H                                                      | 0.93761500                  | 0.88821200  | -2.38518800 |
| O                                                      | 4.84638200                  | -2.02488800 | 1.16890100  |
| H                                                      | 4.57570100                  | -2.80236100 | 1.67560300  |
| C                                                      | -1.52264100                 | 0.03464100  | -0.52870900 |
| C                                                      | -1.52132900                 | 0.96498500  | 0.52889300  |
| Frequency and Energy at B3LYP/6-311G(d,p) in gas phase |                             |             |             |
| Zero-point correction=                                 | 0.247782 (Hartree/Particle) |             |             |
| Thermal correction to Energy=                          | 0.265228                    |             |             |
| Thermal correction to Enthalpy=                        | 0.266172                    |             |             |
| Thermal correction to Gibbs Free Energy=               | 0.201566                    |             |             |
| Sum of electronic and zero-point Energies=             | -1029.895164                |             |             |
| Sum of electronic and thermal Energies=                | -1029.877718                |             |             |
| Sum of electronic and thermal Enthalpies=              | -1029.876774                |             |             |

Sum of electronic and thermal Free Energies= -1029.941380

| Name of compound (5)                                   |             |                             |             | Naringenin |
|--------------------------------------------------------|-------------|-----------------------------|-------------|------------|
| Cartesian Coordinates optimized at B3LYP/6-311G(d,p)   |             |                             |             |            |
| C                                                      | 2.52246200  | 0.46348200                  | -0.97294500 |            |
| C                                                      | 3.18880400  | -0.75353500                 | -1.08099000 |            |
| C                                                      | 2.88942700  | -1.77745300                 | -0.18088600 |            |
| C                                                      | 1.92479400  | -1.62372000                 | 0.82177000  |            |
| H                                                      | 3.93118400  | -0.87920400                 | -1.86082500 |            |
| C                                                      | 0.91603000  | 1.94630900                  | 0.22282700  |            |
| C                                                      | -0.66703900 | 0.74786300                  | 1.77305700  |            |
| C                                                      | 0.00848700  | 2.07246700                  | 1.43005800  |            |
| O                                                      | 0.34655700  | -0.29081300                 | 1.92319300  |            |
| O                                                      | 1.11801200  | 2.91342800                  | -0.52316400 |            |
| O                                                      | 3.50967600  | -2.98261900                 | -0.24200800 |            |
| H                                                      | 4.13689100  | -2.98198600                 | -0.97323400 |            |
| H                                                      | 0.63752400  | 2.37195800                  | 2.27625000  |            |
| C                                                      | -1.75424000 | 0.28284700                  | 0.81722500  |            |
| C                                                      | -2.40361700 | -0.92600300                 | 1.09189100  |            |
| C                                                      | -2.15584600 | 1.00182700                  | -0.31293100 |            |
| C                                                      | -3.41381200 | -1.40612800                 | 0.26939500  |            |
| H                                                      | -2.10354000 | -1.50631400                 | 1.95738400  |            |
| C                                                      | -3.16880800 | 0.53404500                  | -1.14339900 |            |
| H                                                      | -1.68118700 | 1.94110000                  | -0.56905500 |            |
| C                                                      | -3.80256100 | -0.67379100                 | -0.85629200 |            |
| H                                                      | -3.90309300 | -2.34786200                 | 0.50125500  |            |
| H                                                      | -3.47584500 | 1.09160500                  | -2.01958200 |            |
| H                                                      | -1.08739400 | 0.80916900                  | 2.77859800  |            |
| O                                                      | -4.78929200 | -1.08808600                 | -1.70167700 |            |
| H                                                      | -5.13616900 | -1.93317300                 | -1.39757900 |            |
| C                                                      | 1.26191400  | -0.41387900                 | 0.92746200  |            |
| C                                                      | 1.54754600  | 0.66053000                  | 0.04629000  |            |
| H                                                      | 1.69634200  | -2.43965200                 | 1.49259900  |            |
| O                                                      | 2.82380800  | 1.44424700                  | -1.82936500 |            |
| H                                                      | 2.26791000  | 2.22371700                  | -1.58112800 |            |
| H                                                      | -0.71396700 | 2.87221800                  | 1.26428600  |            |
| Frequency and Energy at B3LYP/6-311G(d,p) in gas phase |             |                             |             |            |
| Zero-point correction=                                 |             | 0.244238 (Hartree/Particle) |             |            |
| Thermal correction to Energy=                          |             | 0.260163                    |             |            |
| Thermal correction to Enthalpy=                        |             | 0.261108                    |             |            |
| Thermal correction to Gibbs Free Energy=               |             | 0.200128                    |             |            |
| Sum of electronic and zero-point Energies=             |             | -954.955241                 |             |            |
| Sum of electronic and thermal Energies=                |             | -954.939316                 |             |            |
| Sum of electronic and thermal Enthalpies=              |             | -954.938372                 |             |            |
| Sum of electronic and thermal Free Energies=           |             | -954.999351                 |             |            |
| Name of radical                                        |             |                             |             | O4'-H      |
| Cartesian Coordinates optimized at B3LYP/6-311G(d,p)   |             |                             |             |            |
| C                                                      | 2.49901400  | 0.55642400                  | -1.01953200 |            |
| C                                                      | 3.32825600  | -0.56056100                 | -0.97319900 |            |
| C                                                      | 3.14183200  | -1.50824500                 | 0.03388100  |            |
| C                                                      | 2.12744900  | -1.38063300                 | 0.99240600  |            |
| H                                                      | 4.10936900  | -0.66637300                 | -1.71716300 |            |
| C                                                      | 0.68353200  | 1.93718700                  | -0.01457200 |            |
| C                                                      | -0.76634600 | 0.72223500                  | 1.65708800  |            |

|                                                        |                             |             |             |
|--------------------------------------------------------|-----------------------------|-------------|-------------|
| C                                                      | -0.23919000                 | 2.08255800  | 1.17824200  |
| O                                                      | 0.32181000                  | -0.19014500 | 1.88394700  |
| O                                                      | 0.78141700                  | 2.83881800  | -0.85332800 |
| O                                                      | 3.92224600                  | -2.61146100 | 0.12916200  |
| H                                                      | 4.57373500                  | -2.60782500 | -0.58076200 |
| H                                                      | 0.33981900                  | 2.54223500  | 1.98753200  |
| C                                                      | -1.83667100                 | 0.11797500  | 0.75946900  |
| C                                                      | -1.72863100                 | -1.19198500 | 0.24814800  |
| C                                                      | -3.00753200                 | 0.86920100  | 0.49223300  |
| C                                                      | -2.72865200                 | -1.72965400 | -0.52687200 |
| H                                                      | -0.84766100                 | -1.77764700 | 0.47363900  |
| C                                                      | -4.02128900                 | 0.35416100  | -0.27332900 |
| H                                                      | -3.10767900                 | 1.86789100  | 0.90432500  |
| C                                                      | -3.93225800                 | -0.98215800 | -0.83406200 |
| H                                                      | -2.65638900                 | -2.73218800 | -0.93174700 |
| H                                                      | -4.92123400                 | 0.91906400  | -0.48555500 |
| H                                                      | -1.20473100                 | 0.84554600  | 2.65176000  |
| O                                                      | -4.84775700                 | -1.46302600 | -1.53655600 |
| C                                                      | 1.30169500                  | -0.27295500 | 0.93883800  |
| C                                                      | 1.46859800                  | 0.72640500  | -0.05058800 |
| H                                                      | 1.99149200                  | -2.13864900 | 1.75095900  |
| O                                                      | 2.69667500                  | 1.46963400  | -1.97274300 |
| H                                                      | 2.03591900                  | 2.19039400  | -1.82700600 |
| H                                                      | -1.04661000                 | 2.76726400  | 0.92126000  |
| Frequency and Energy at B3LYP/6-311G(d,p) in gas phase |                             |             |             |
| Zero-point correction=                                 | 0.231174 (Hartree/Particle) |             |             |
| Thermal correction to Energy=                          | 0.246805                    |             |             |
| Thermal correction to Enthalpy=                        | 0.247749                    |             |             |
| Thermal correction to Gibbs Free Energy=               | 0.186620                    |             |             |
| Sum of electronic and zero-point Energies=             | -954.322437                 |             |             |
| Sum of electronic and thermal Energies=                | -954.306806                 |             |             |
| Sum of electronic and thermal Enthalpies=              | -954.305862                 |             |             |
| Sum of electronic and thermal Free Energies=           | -954.366991                 |             |             |
| <b>Name of radical</b>                                 | C2-H                        |             |             |
| Cartesian Coordinates optimized at B3LYP/6-311G(d,p)   |                             |             |             |
| C                                                      | 3.43347700                  | 0.63169800  | -0.26980700 |
| C                                                      | 4.15455200                  | -0.55836000 | -0.25889500 |
| C                                                      | 3.49102700                  | -1.75964500 | 0.00211600  |
| C                                                      | 2.11354800                  | -1.80598200 | 0.24422700  |
| H                                                      | 5.22078400                  | -0.52774800 | -0.45146100 |
| C                                                      | 1.29071800                  | 1.85474300  | 0.08029000  |
| C                                                      | -0.75240200                 | 0.40286100  | 0.32186400  |
| C                                                      | -0.14593100                 | 1.74615000  | 0.56133400  |
| O                                                      | 0.06102100                  | -0.70660100 | 0.42968000  |
| O                                                      | 1.78296900                  | 2.96424100  | -0.15371900 |
| O                                                      | 4.14681500                  | -2.94646400 | 0.02282300  |
| H                                                      | 5.08030400                  | -2.80081200 | -0.16565700 |
| H                                                      | -0.13329500                 | 2.00025200  | 1.63664100  |
| C                                                      | -2.13173900                 | 0.12687100  | 0.14967500  |
| C                                                      | -2.60265100                 | -1.20066800 | -0.04000500 |
| C                                                      | -3.10846000                 | 1.16123200  | 0.15771300  |
| C                                                      | -3.94821700                 | -1.46660200 | -0.21592700 |
| H                                                      | -1.89111400                 | -2.01465900 | -0.04874300 |
| C                                                      | -4.45053700                 | 0.88961100  | -0.02162100 |



|                                                        |                             |             |             |
|--------------------------------------------------------|-----------------------------|-------------|-------------|
| H                                                      | -2.80814900                 | 2.18963500  | 0.31317700  |
| C                                                      | -4.88616300                 | -0.42717100 | -0.21107300 |
| H                                                      | -4.27907800                 | -2.49143300 | -0.36070000 |
| H                                                      | -5.18579900                 | 1.68508200  | -0.01423300 |
| O                                                      | -6.22435100                 | -0.63275200 | -0.38093400 |
| H                                                      | -6.38930500                 | -1.57398100 | -0.49928700 |
| C                                                      | 1.40330800                  | -0.61881400 | 0.22855100  |
| C                                                      | 2.03240600                  | 0.62392800  | -0.01094400 |
| H                                                      | 1.61833200                  | -2.75010700 | 0.42085100  |
| O                                                      | 4.07461900                  | 1.77788600  | -0.51052900 |
| H                                                      | 3.40081300                  | 2.50094400  | -0.46508500 |
| H                                                      | -0.71969500                 | 2.53323700  | 0.07093700  |
| Frequency and Energy at B3LYP/6-311G(d,p) in gas phase |                             |             |             |
| Zero-point correction=                                 | 0.230239 (Hartree/Particle) |             |             |
| Thermal correction to Energy=                          | 0.246497                    |             |             |
| Thermal correction to Enthalpy=                        | 0.247442                    |             |             |
| Thermal correction to Gibbs Free Energy=               | 0.185336                    |             |             |
| Sum of electronic and zero-point Energies=             | -954.331541                 |             |             |
| Sum of electronic and thermal Energies=                | -954.315283                 |             |             |
| Sum of electronic and thermal Enthalpies=              | -954.314338                 |             |             |
| Sum of electronic and thermal Free Energies=           | -954.376444                 |             |             |
| <b>Name of anion</b>                                   |                             | O4'-H       |             |
| Cartesian Coordinates optimized at B3LYP/6-311G(d,p)   |                             |             |             |
| C                                                      | 2.64522200                  | 0.50139000  | -0.84697700 |
| C                                                      | 3.33135800                  | -0.70154000 | -0.96774100 |
| C                                                      | 2.96507100                  | -1.77667300 | -0.14992900 |
| C                                                      | 1.93217600                  | -1.68459700 | 0.77712100  |
| H                                                      | 4.13330000                  | -0.78373500 | -1.69348300 |
| C                                                      | 0.92429200                  | 1.90402600  | 0.27562500  |
| C                                                      | -0.81960100                 | 0.66560000  | 1.66698000  |
| C                                                      | -0.09756400                 | 1.98436100  | 1.38646000  |
| O                                                      | 0.27495000                  | -0.41091400 | 1.82413300  |
| O                                                      | 1.19525800                  | 2.91090100  | -0.40526900 |
| O                                                      | 3.61594600                  | -2.97637200 | -0.23913000 |
| H                                                      | 4.26160000                  | -2.91705200 | -0.95047100 |
| H                                                      | 0.45423400                  | 2.28860100  | 2.28556600  |
| C                                                      | -1.89384700                 | 0.26062500  | 0.74022600  |
| C                                                      | -2.90561700                 | -0.61483400 | 1.20246600  |
| C                                                      | -1.97730200                 | 0.66164000  | -0.61481500 |
| C                                                      | -3.92091000                 | -1.06436400 | 0.39244800  |
| H                                                      | -2.86895200                 | -0.94199900 | 2.24174000  |
| C                                                      | -2.98765000                 | 0.22798500  | -1.44322900 |
| H                                                      | -1.23621900                 | 1.34534800  | -1.02175400 |
| C                                                      | -4.03727500                 | -0.67638900 | -1.00422800 |
| H                                                      | -4.69029400                 | -1.72857900 | 0.77720900  |
| H                                                      | -3.03867500                 | 0.56390300  | -2.47524900 |
| H                                                      | -1.19247100                 | 0.66059600  | 2.69196200  |
| O                                                      | -4.96224500                 | -1.07174500 | -1.75104900 |
| C                                                      | 1.24145400                  | -0.47825600 | 0.90991600  |
| C                                                      | 1.59337300                  | 0.63906800  | 0.10198200  |
| H                                                      | 1.64872700                  | -2.53883600 | 1.37564000  |
| O                                                      | 2.99888300                  | 1.53596300  | -1.62500800 |
| H                                                      | 2.39718000                  | 2.28511400  | -1.36880200 |
| H                                                      | -0.80985000                 | 2.77572500  | 1.15039200  |

|                                                        |                             |             |             |
|--------------------------------------------------------|-----------------------------|-------------|-------------|
| Frequency and Energy at B3LYP/6-311G(d,p) in gas phase |                             |             |             |
| Zero-point correction=                                 | 0.229611 (Hartree/Particle) |             |             |
| Thermal correction to Energy=                          | 0.245429                    |             |             |
| Thermal correction to Enthalpy=                        | 0.246373                    |             |             |
| Thermal correction to Gibbs Free Energy=               | 0.185826                    |             |             |
| Sum of electronic and zero-point Energies=             | -954.413247                 |             |             |
| Sum of electronic and thermal Energies=                | -954.397428                 |             |             |
| Sum of electronic and thermal Enthalpies=              | -954.396484                 |             |             |
| Sum of electronic and thermal Free Energies=           | -954.457031                 |             |             |
| <b>Name of anion</b>                                   |                             | O7-H        |             |
| Cartesian Coordinates optimized at B3LYP/6-311G(d,p)   |                             |             |             |
| C                                                      | 2.59802600                  | 0.36215900  | -1.05001300 |
| C                                                      | 3.33000800                  | -0.79036000 | -0.95573900 |
| C                                                      | 3.13250300                  | -1.74771600 | 0.11828700  |
| C                                                      | 2.08118800                  | -1.40972000 | 1.07724000  |
| H                                                      | 4.09376000                  | -1.00563300 | -1.69426600 |
| C                                                      | 0.87946500                  | 1.91762000  | -0.12687600 |
| C                                                      | -0.65404300                 | 0.89732200  | 1.62300600  |
| C                                                      | -0.08412800                 | 2.18811600  | 1.02033600  |
| O                                                      | 0.39118100                  | -0.02363300 | 1.93798600  |
| O                                                      | 1.02657600                  | 2.80580700  | -1.00626200 |
| O                                                      | 3.79643500                  | -2.79837800 | 0.21965700  |
| H                                                      | 0.46109900                  | 2.73486300  | 1.79954200  |
| C                                                      | -1.75504400                 | 0.25796700  | 0.77784600  |
| C                                                      | -1.63822300                 | -1.03156700 | 0.25909600  |
| C                                                      | -2.95003300                 | 0.95089800  | 0.55000100  |
| C                                                      | -2.67362600                 | -1.60209300 | -0.47894800 |
| H                                                      | -0.72882000                 | -1.59445900 | 0.42272100  |
| C                                                      | -3.99208000                 | 0.39097200  | -0.18029800 |
| H                                                      | -3.07496000                 | 1.95262200  | 0.95006000  |
| C                                                      | -3.85208300                 | -0.89409200 | -0.70301300 |
| H                                                      | -2.55593700                 | -2.60385400 | -0.88481700 |
| H                                                      | -4.91328400                 | 0.93413000  | -0.35650400 |
| H                                                      | -1.09329400                 | 1.12839800  | 2.59972300  |
| O                                                      | -4.90281500                 | -1.41338400 | -1.42244900 |
| H                                                      | -4.64385400                 | -2.28185600 | -1.74627000 |
| C                                                      | 1.36027400                  | -0.25861200 | 0.97061800  |
| C                                                      | 1.57412800                  | 0.69005400  | -0.08126000 |
| H                                                      | 1.88586900                  | -2.10590400 | 1.88466900  |
| O                                                      | 2.82595200                  | 1.23889500  | -2.05984800 |
| H                                                      | 2.21088700                  | 1.99892600  | -1.90392100 |
| H                                                      | -0.87808200                 | 2.84262000  | 0.65470300  |
| Frequency and Energy at B3LYP/6-311G(d,p) in gas phase |                             |             |             |
| Zero-point correction=                                 | 0.230715 (Hartree/Particle) |             |             |
| Thermal correction to Energy=                          | 0.246433                    |             |             |
| Thermal correction to Enthalpy=                        | 0.247377                    |             |             |
| Thermal correction to Gibbs Free Energy=               | 0.186497                    |             |             |
| Sum of electronic and zero-point Energies=             | -954.423991                 |             |             |
| Sum of electronic and thermal Energies=                | -954.408273                 |             |             |
| Sum of electronic and thermal Enthalpies=              | -954.407329                 |             |             |
| Sum of electronic and thermal Free Energies=           | -954.468209                 |             |             |
| <b>Name of anion</b>                                   |                             | C2-H        |             |
| Cartesian Coordinates optimized at B3LYP/6-311G(d,p)   |                             |             |             |
| C                                                      | 3.32305200                  | 0.67786000  | -0.41885400 |

|                                                        |                             |             |             |
|--------------------------------------------------------|-----------------------------|-------------|-------------|
| C                                                      | 4.11478000                  | -0.46154600 | -0.39105200 |
| C                                                      | 3.54803700                  | -1.68528500 | 0.01469600  |
| C                                                      | 2.21664300                  | -1.79526700 | 0.37671400  |
| H                                                      | 5.15710800                  | -0.39049300 | -0.68609000 |
| C                                                      | 1.18682300                  | 1.82140300  | 0.15557000  |
| C                                                      | -0.71237800                 | 0.38078800  | 0.44956200  |
| C                                                      | -0.10284800                 | 1.64983500  | 0.93306300  |
| O                                                      | 0.10936900                  | -0.76408000 | 0.58367600  |
| O                                                      | 1.57668600                  | 2.94319000  | -0.25404200 |
| O                                                      | 4.31433200                  | -2.83203100 | 0.03978600  |
| H                                                      | 5.19458700                  | -2.59892100 | -0.26968700 |
| H                                                      | 0.10315100                  | 1.69429200  | 2.02980000  |
| C                                                      | -2.07503000                 | 0.10805900  | 0.21877300  |
| C                                                      | -2.54638100                 | -1.20402100 | -0.10475100 |
| C                                                      | -3.09063200                 | 1.11552200  | 0.28071900  |
| C                                                      | -3.88654800                 | -1.46270300 | -0.35312700 |
| H                                                      | -1.83018500                 | -2.01344900 | -0.15978700 |
| C                                                      | -4.42409700                 | 0.84420400  | 0.01367700  |
| H                                                      | -2.81830500                 | 2.13106800  | 0.54410600  |
| C                                                      | -4.84307900                 | -0.44696300 | -0.30619900 |
| H                                                      | -4.19450200                 | -2.48006100 | -0.59532200 |
| H                                                      | -5.16503200                 | 1.63632600  | 0.06412500  |
| O                                                      | -6.19791100                 | -0.66956500 | -0.55768700 |
| H                                                      | -6.29643200                 | -1.60390600 | -0.76129700 |
| C                                                      | 1.41447200                  | -0.64396900 | 0.33907300  |
| C                                                      | 1.95757300                  | 0.61894100  | -0.01502900 |
| H                                                      | 1.78953500                  | -2.75372800 | 0.63958500  |
| O                                                      | 3.85019000                  | 1.85547700  | -0.80391800 |
| H                                                      | 3.10059400                  | 2.51303300  | -0.72580200 |
| H                                                      | -0.74417800                 | 2.50075100  | 0.70084300  |
| Frequency and Energy at B3LYP/6-311G(d,p) in gas phase |                             |             |             |
| Zero-point correction=                                 | 0.227208 (Hartree/Particle) |             |             |
| Thermal correction to Energy=                          | 0.243896                    |             |             |
| Thermal correction to Enthalpy=                        | 0.244840                    |             |             |
| Thermal correction to Gibbs Free Energy=               | 0.182773                    |             |             |
| Sum of electronic and zero-point Energies=             | -954.374859                 |             |             |
| Sum of electronic and thermal Energies=                | -954.358171                 |             |             |
| Sum of electronic and thermal Enthalpies=              | -954.357227                 |             |             |
| Sum of electronic and thermal Free Energies=           | -954.419294                 |             |             |
| <b>Name of cationic radical</b>                        |                             |             |             |
| Cartesian Coordinates optimized at B3LYP/6-311G(d,p)   |                             |             |             |
| C                                                      | 2.64621700                  | 0.50090900  | -0.86004100 |
| C                                                      | 3.34636400                  | -0.72662600 | -0.98774100 |
| C                                                      | 2.98901800                  | -1.80467700 | -0.18850500 |
| C                                                      | 1.91665400                  | -1.69230300 | 0.72315900  |
| H                                                      | 4.15345300                  | -0.78273400 | -1.70848500 |
| C                                                      | 0.94676500                  | 1.93633800  | 0.27327000  |
| C                                                      | -0.73240700                 | 0.69660300  | 1.71753500  |
| C                                                      | -0.01820800                 | 2.01604100  | 1.43492100  |
| O                                                      | 0.24392000                  | -0.43604900 | 1.74001100  |
| O                                                      | 1.22013600                  | 2.91464500  | -0.42184600 |
| O                                                      | 3.59045600                  | -2.99987400 | -0.22940200 |
| H                                                      | 4.30831800                  | -3.01604600 | -0.87503200 |
| H                                                      | 0.57367200                  | 2.29815300  | 2.31344500  |

|                                                        |                             |             |             |
|--------------------------------------------------------|-----------------------------|-------------|-------------|
| C                                                      | -1.83537300                 | 0.28325100  | 0.77832000  |
| C                                                      | -2.71844400                 | -0.73028600 | 1.20281200  |
| C                                                      | -2.00727800                 | 0.83238100  | -0.50534500 |
| C                                                      | -3.73892100                 | -1.17734400 | 0.38857300  |
| H                                                      | -2.59821600                 | -1.16490900 | 2.18874200  |
| C                                                      | -3.02756300                 | 0.40042200  | -1.33011200 |
| H                                                      | -1.36371800                 | 1.62718800  | -0.86077800 |
| C                                                      | -3.90093400                 | -0.61370700 | -0.89118300 |
| H                                                      | -4.41903600                 | -1.94922800 | 0.73278800  |
| H                                                      | -3.18528900                 | 0.83169500  | -2.31035700 |
| H                                                      | -1.10024500                 | 0.68749200  | 2.74166800  |
| O                                                      | -4.86668400                 | -0.98701700 | -1.73894100 |
| H                                                      | -5.42567900                 | -1.67579100 | -1.35637600 |
| C                                                      | 1.22789300                  | -0.46375500 | 0.84980700  |
| C                                                      | 1.58328100                  | 0.64771300  | 0.07308400  |
| H                                                      | 1.61915300                  | -2.54367100 | 1.32081100  |
| O                                                      | 3.02064700                  | 1.50202100  | -1.61634000 |
| H                                                      | 2.44506000                  | 2.28975900  | -1.39096800 |
| H                                                      | -0.73765000                 | 2.81853700  | 1.26537200  |
| Frequency and Energy at B3LYP/6-311G(d,p) in gas phase |                             |             |             |
| Zero-point correction=                                 | 0.243180 (Hartree/Particle) |             |             |
| Thermal correction to Energy=                          | 0.259192                    |             |             |
| Thermal correction to Enthalpy=                        | 0.260136                    |             |             |
| Thermal correction to Gibbs Free Energy=               | 0.198576                    |             |             |
| Sum of electronic and zero-point Energies=             | -954.678244                 |             |             |
| Sum of electronic and thermal Energies=                | -954.662232                 |             |             |
| Sum of electronic and thermal Enthalpies=              | -954.661288                 |             |             |
| Sum of electronic and thermal Free Energies=           | -954.722848                 |             |             |

| Name of compound (6)                                 | Pinobanksin |             |             |
|------------------------------------------------------|-------------|-------------|-------------|
| Cartesian Coordinates optimized at B3LYP/6-311G(d,p) |             |             |             |
| C                                                    | -2.37957200 | 0.43636500  | 1.03762200  |
| C                                                    | -3.30557300 | -0.56660100 | 0.77532100  |
| C                                                    | -3.08468000 | -1.43315400 | -0.29827600 |
| C                                                    | -1.94829600 | -1.33615500 | -1.10883700 |
| H                                                    | -4.18660600 | -0.64777100 | 1.40131900  |
| C                                                    | -0.30429300 | 1.66097500  | 0.42550700  |
| C                                                    | 1.19995800  | 0.50816500  | -1.26285700 |
| C                                                    | 0.78708600  | 1.83611900  | -0.62541400 |
| O                                                    | 0.06530200  | -0.28995000 | -1.64587300 |
| O                                                    | -0.41999900 | 2.50984800  | 1.32197400  |
| O                                                    | -3.95801100 | -2.42391500 | -0.60252000 |
| H                                                    | -4.69437000 | -2.40533900 | 0.01852100  |
| C                                                    | 2.18115200  | -0.27966900 | -0.40219300 |
| C                                                    | 1.85775800  | -1.51085000 | 0.16863900  |
| C                                                    | 3.46675200  | 0.23860200  | -0.20520200 |
| C                                                    | 2.79420600  | -2.19867800 | 0.93982500  |
| H                                                    | 0.87882800  | -1.94250000 | 0.00898000  |
| C                                                    | 4.40129700  | -0.44835300 | 0.56230600  |
| H                                                    | 3.74526300  | 1.18240100  | -0.66375800 |
| C                                                    | 4.06531900  | -1.67058100 | 1.14217700  |
| H                                                    | 2.52588100  | -3.15277300 | 1.37925300  |
| H                                                    | 5.39251800  | -0.03232900 | 0.70292600  |
| H                                                    | 1.67707300  | 0.75132700  | -2.21480400 |

|                                                        |                             |             |             |
|--------------------------------------------------------|-----------------------------|-------------|-------------|
| C                                                      | -1.02128700                 | -0.34269300 | -0.84082000 |
| C                                                      | -1.21343800                 | 0.56926700  | 0.22816100  |
| H                                                      | 4.79170200                  | -2.20822700 | 1.74077200  |
| H                                                      | 1.65644600                  | 2.29146700  | -0.14087500 |
| O                                                      | 0.27827200                  | 2.67254200  | -1.66366400 |
| H                                                      | 0.00218000                  | 3.50255400  | -1.25850700 |
| H                                                      | -1.79611400                 | -2.02631900 | -1.92654300 |
| O                                                      | -2.60439800                 | 1.27915400  | 2.04985500  |
| H                                                      | -1.86046000                 | 1.92952500  | 2.05878400  |
| Frequency and Energy at B3LYP/6-311G(d,p) in gas phase |                             |             |             |
| Zero-point correction=                                 | 0.244614 (Hartree/Particle) |             |             |
| Thermal correction to Energy=                          | 0.260606                    |             |             |
| Thermal correction to Enthalpy=                        | 0.261550                    |             |             |
| Thermal correction to Gibbs Free Energy=               | 0.200421                    |             |             |
| Sum of electronic and zero-point Energies=             | -954.943046                 |             |             |
| Sum of electronic and thermal Energies=                | -954.927054                 |             |             |
| Sum of electronic and thermal Enthalpies=              | -954.926110                 |             |             |
| Sum of electronic and thermal Free Energies=           | -954.987239                 |             |             |
| <b>Name of radical</b>                                 | O7-H                        |             |             |
| Cartesian Coordinates optimized at B3LYP/6-311G(d,p)   |                             |             |             |
| C                                                      | -2.37101900                 | 0.35984000  | 1.09154700  |
| C                                                      | -3.28801000                 | -0.63983500 | 0.83815900  |
| C                                                      | -3.11765900                 | -1.52837100 | -0.29054800 |
| C                                                      | -1.95361300                 | -1.36206700 | -1.13763800 |
| H                                                      | -4.15365500                 | -0.76984200 | 1.47362100  |
| C                                                      | -0.31981600                 | 1.62997300  | 0.41732000  |
| C                                                      | 1.16099500                  | 0.53003900  | -1.30509100 |
| C                                                      | 0.71332600                  | 1.85046200  | -0.68107700 |
| O                                                      | 0.03220100                  | -0.27074100 | -1.69471900 |
| O                                                      | -0.40644000                 | 2.43594300  | 1.34840400  |
| O                                                      | -3.95194600                 | -2.43199200 | -0.52340500 |
| C                                                      | 2.13594400                  | -0.24417700 | -0.42337000 |
| C                                                      | 1.86894200                  | -1.54317800 | 0.01133700  |
| C                                                      | 3.35981300                  | 0.34360400  | -0.08009400 |
| C                                                      | 2.79554300                  | -2.23060600 | 0.79433900  |
| H                                                      | 0.94360700                  | -2.02828700 | -0.26807300 |
| C                                                      | 4.28483000                  | -0.34354400 | 0.69881700  |
| H                                                      | 3.60319300                  | 1.34043100  | -0.43329000 |
| C                                                      | 4.00246400                  | -1.63381500 | 1.14396300  |
| H                                                      | 2.57052400                  | -3.23774700 | 1.12617300  |
| H                                                      | 5.22742000                  | 0.12701200  | 0.95412400  |
| H                                                      | 1.64346100                  | 0.77179500  | -2.25483700 |
| C                                                      | -1.04282800                 | -0.37096300 | -0.87290900 |
| C                                                      | -1.23736600                 | 0.52226500  | 0.22865600  |
| H                                                      | 4.72165900                  | -2.17041400 | 1.75189900  |
| H                                                      | 1.57161500                  | 2.36762600  | -0.24348300 |
| O                                                      | 0.10307600                  | 2.62588600  | -1.71001300 |
| H                                                      | -0.13919500                 | 3.48028100  | -1.33531900 |
| H                                                      | -1.81936800                 | -2.03522400 | -1.97337900 |
| O                                                      | -2.56298500                 | 1.17670500  | 2.13627300  |
| H                                                      | -1.82978900                 | 1.83019300  | 2.14977600  |
| Frequency and Energy at B3LYP/6-311G(d,p) in gas phase |                             |             |             |
| Zero-point correction=                                 | 0.230634 (Hartree/Particle) |             |             |
| Thermal correction to Energy=                          | 0.246507                    |             |             |

|                                                        |                                     |
|--------------------------------------------------------|-------------------------------------|
| Thermal correction to Enthalpy=                        | 0.247451                            |
| Thermal correction to Gibbs Free Energy=               | 0.185428                            |
| Sum of electronic and zero-point Energies=             | -954.301216                         |
| Sum of electronic and thermal Energies=                | -954.285344                         |
| Sum of electronic and thermal Enthalpies=              | -954.284400                         |
| Sum of electronic and thermal Free Energies=           | -954.346423                         |
| <b>Name of radical</b>                                 | C3-H                                |
| Cartesian Coordinates optimized at B3LYP/6-311G(d,p)   |                                     |
| C                                                      | 2.74942800 0.66094300 -0.60774000   |
| C                                                      | 3.60505300 -0.43480300 -0.53570200  |
| C                                                      | 3.19693500 -1.57321800 0.16211600   |
| C                                                      | 1.94667600 -1.64988800 0.78831900   |
| H                                                      | 4.57583900 -0.37776000 -1.01450000  |
| C                                                      | 0.58345900 1.74366000 -0.02676600   |
| C                                                      | -1.16052800 0.28177300 1.18121800   |
| C                                                      | -0.68189100 1.57204200 0.59664700   |
| O                                                      | -0.09359900 -0.66609900 1.36305400  |
| O                                                      | 0.85192100 2.85829600 -0.56373000   |
| O                                                      | 3.99170200 -2.66893600 0.26762200   |
| H                                                      | 4.81948200 -2.50913400 -0.19838900  |
| C                                                      | -2.29063000 -0.32790500 0.35402300  |
| C                                                      | -2.01875800 -1.16383900 -0.73108300 |
| C                                                      | -3.61464000 -0.02010300 0.66956900  |
| C                                                      | -3.06330400 -1.68383400 -1.49034200 |
| H                                                      | -0.99524600 -1.41943100 -0.97740500 |
| C                                                      | -4.65835400 -0.53585100 -0.09505600 |
| H                                                      | -3.83115400 0.62578700 1.51384100   |
| C                                                      | -4.38447600 -1.36951100 -1.17651700 |
| H                                                      | -2.84453600 -2.33696300 -2.32753100 |
| H                                                      | -5.68371200 -0.29273100 0.15951400  |
| H                                                      | -1.54612200 0.47905700 2.18809400   |
| C                                                      | 1.09840800 -0.55858600 0.71067800   |
| C                                                      | 1.47371100 0.60976100 0.01070800    |
| H                                                      | -5.19582900 -1.77643700 -1.76918400 |
| O                                                      | -1.52270000 2.60396900 0.60697700   |
| H                                                      | -1.04511600 3.31476800 0.12991100   |
| H                                                      | 1.65527200 -2.54042800 1.32687500   |
| O                                                      | 3.14510600 1.76010500 -1.26319900   |
| H                                                      | 2.42514700 2.43074500 -1.17745000   |
| Frequency and Energy at B3LYP/6-311G(d,p) in gas phase |                                     |
| Zero-point correction=                                 | 0.231982 (Hartree/Particle)         |
| Thermal correction to Energy=                          | 0.247885                            |
| Thermal correction to Enthalpy=                        | 0.248830                            |
| Thermal correction to Gibbs Free Energy=               | 0.186273                            |
| Sum of electronic and zero-point Energies=             | -954.329999                         |
| Sum of electronic and thermal Energies=                | -954.314096                         |
| Sum of electronic and thermal Enthalpies=              | -954.313152                         |
| Sum of electronic and thermal Free Energies=           | -954.375708                         |
| <b>Name of anion</b>                                   | O7-H                                |
| Cartesian Coordinates optimized at B3LYP/6-311G(d,p)   |                                     |
| C                                                      | 3.18995100 0.59947100 0.00959200    |
| C                                                      | 3.97787000 -0.51138100 0.11170600   |
| C                                                      | 3.42063600 -1.85526900 0.14498900   |
| C                                                      | 1.95962500 -1.94131100 0.09096400   |

|                                                        |                             |             |             |
|--------------------------------------------------------|-----------------------------|-------------|-------------|
| H                                                      | 5.05519800                  | -0.40851100 | 0.16922200  |
| C                                                      | 0.93044700                  | 1.61138300  | -0.25954500 |
| C                                                      | -0.98376100                 | 0.11764800  | 0.34838400  |
| C                                                      | -0.57361500                 | 1.37206200  | -0.43879200 |
| O                                                      | -0.18600300                 | -0.98384700 | -0.09019500 |
| O                                                      | 1.29959700                  | 2.82315900  | -0.27650700 |
| O                                                      | 4.12987400                  | -2.87409700 | 0.23262100  |
| C                                                      | -2.44329700                 | -0.25967500 | 0.18760900  |
| C                                                      | -2.82558300                 | -1.41303300 | -0.50187000 |
| C                                                      | -3.43718600                 | 0.55912500  | 0.73782200  |
| C                                                      | -4.17410300                 | -1.74066000 | -0.63993000 |
| H                                                      | -2.05719700                 | -2.05092600 | -0.91724800 |
| C                                                      | -4.78221600                 | 0.23145200  | 0.59645700  |
| H                                                      | -3.14495500                 | 1.46523600  | 1.25322900  |
| C                                                      | -5.15771700                 | -0.92179600 | -0.09221500 |
| H                                                      | -4.45368800                 | -2.64212000 | -1.17587100 |
| H                                                      | -5.53994800                 | 0.87881000  | 1.02617000  |
| H                                                      | -0.77818900                 | 0.31515500  | 1.41047300  |
| C                                                      | 1.18884000                  | -0.82817000 | -0.01729000 |
| C                                                      | 1.74966700                  | 0.49231900  | -0.07952600 |
| H                                                      | -6.20674400                 | -1.17858000 | -0.19875800 |
| H                                                      | -0.77438900                 | 1.18245600  | -1.50568200 |
| O                                                      | -1.27146000                 | 2.52222600  | -0.00258800 |
| H                                                      | -0.56916600                 | 3.20030500  | 0.00594400  |
| H                                                      | 1.50665000                  | -2.92355400 | 0.15128200  |
| O                                                      | 3.74377900                  | 1.83903400  | -0.02592500 |
| H                                                      | 2.99879500                  | 2.47693500  | -0.10814600 |
| Frequency and Energy at B3LYP/6-311G(d,p) in gas phase |                             |             |             |
| Zero-point correction=                                 | 0.231581 (Hartree/Particle) |             |             |
| Thermal correction to Energy=                          | 0.247061                    |             |             |
| Thermal correction to Enthalpy=                        | 0.248005                    |             |             |
| Thermal correction to Gibbs Free Energy=               | 0.188089                    |             |             |
| Sum of electronic and zero-point Energies=             | -954.430528                 |             |             |
| Sum of electronic and thermal Energies=                | -954.415049                 |             |             |
| Sum of electronic and thermal Enthalpies=              | -954.414104                 |             |             |
| Sum of electronic and thermal Free Energies=           | -954.474021                 |             |             |
| <b>Name of anion</b>                                   | C3-H                        |             |             |
| Cartesian Coordinates optimized at B3LYP/6-311G(d,p)   |                             |             |             |
| C                                                      | -2.58155800                 | 0.59348300  | 0.71189900  |
| C                                                      | -3.37712400                 | -0.56128900 | 0.75465400  |
| C                                                      | -2.98655500                 | -1.68997400 | 0.03629600  |
| C                                                      | -1.81637200                 | -1.70639700 | -0.72194300 |
| H                                                      | -4.29734900                 | -0.54631100 | 1.33211700  |
| C                                                      | -0.57133800                 | 1.81557700  | -0.13417700 |
| C                                                      | 1.13938700                  | 0.39077200  | -1.28286600 |
| C                                                      | 0.60192500                  | 1.69678700  | -0.80438500 |
| O                                                      | 0.08080700                  | -0.56278400 | -1.55508100 |
| O                                                      | -0.99682100                 | 2.94323400  | 0.39030900  |
| O                                                      | -3.74655600                 | -2.84684000 | 0.05124600  |
| H                                                      | -4.49777100                 | -2.68490800 | 0.62959600  |
| C                                                      | 2.18759000                  | -0.26551000 | -0.36299200 |
| C                                                      | 2.46436000                  | -1.63219900 | -0.46720500 |
| C                                                      | 2.90244800                  | 0.49583500  | 0.56564500  |
| C                                                      | 3.42822600                  | -2.22869000 | 0.34311700  |

|                                                        |                             |             |             |
|--------------------------------------------------------|-----------------------------|-------------|-------------|
| H                                                      | 1.89885800                  | -2.22795100 | -1.17407400 |
| C                                                      | 3.87758700                  | -0.09728300 | 1.36671900  |
| H                                                      | 2.69004000                  | 1.55497300  | 0.64190400  |
| C                                                      | 4.14255900                  | -1.46157200 | 1.26214500  |
| H                                                      | 3.61742700                  | -3.29492500 | 0.26150200  |
| H                                                      | 4.42440200                  | 0.50825900  | 2.08304100  |
| H                                                      | 1.62409200                  | 0.53056900  | -2.26032400 |
| C                                                      | -1.03199100                 | -0.55283600 | -0.74761600 |
| C                                                      | -1.38347700                 | 0.59323800  | -0.03090900 |
| H                                                      | 4.89404200                  | -1.92410900 | 1.89454200  |
| O                                                      | 1.43378700                  | 2.81225900  | -0.95207500 |
| H                                                      | 0.90683600                  | 3.49990300  | -0.50790300 |
| H                                                      | -1.52863200                 | -2.58818200 | -1.27898100 |
| O                                                      | -2.95482800                 | 1.70779400  | 1.36076000  |
| H                                                      | -2.23705300                 | 2.40373100  | 1.08701500  |
| Frequency and Energy at B3LYP/6-311G(d,p) in gas phase |                             |             |             |
| Zero-point correction=                                 | 0.229093 (Hartree/Particle) |             |             |
| Thermal correction to Energy=                          | 0.245077                    |             |             |
| Thermal correction to Enthalpy=                        | 0.246022                    |             |             |
| Thermal correction to Gibbs Free Energy=               | 0.184838                    |             |             |
| Sum of electronic and zero-point Energies=             | -954.396863                 |             |             |
| Sum of electronic and thermal Energies=                | -954.380878                 |             |             |
| Sum of electronic and thermal Enthalpies=              | -954.379934                 |             |             |
| Sum of electronic and thermal Free Energies=           | -954.441118                 |             |             |
| <b>Name of cationic radical</b>                        |                             |             |             |
| Cartesian Coordinates optimized at B3LYP/6-311G(d,p)   |                             |             |             |
| C                                                      | -2.43805600                 | 0.42911400  | 0.89399900  |
| C                                                      | -3.28182600                 | -0.72163900 | 0.80041400  |
| C                                                      | -2.94666100                 | -1.75224500 | -0.06842200 |
| C                                                      | -1.76275100                 | -1.66936100 | -0.83193400 |
| H                                                      | -4.17444400                 | -0.74718700 | 1.41466700  |
| C                                                      | -0.45863100                 | 1.75170900  | 0.16130200  |
| C                                                      | 1.23771400                  | 0.50254900  | -1.26221700 |
| C                                                      | 0.62414200                  | 1.85312300  | -0.91032400 |
| O                                                      | 0.16301400                  | -0.53787200 | -1.46098400 |
| O                                                      | -0.71398000                 | 2.68301600  | 0.92412700  |
| O                                                      | -3.66872200                 | -2.86300300 | -0.23916000 |
| H                                                      | -4.46487300                 | -2.86812200 | 0.30794900  |
| C                                                      | 2.24597800                  | -0.08410400 | -0.31160900 |
| C                                                      | 2.30400800                  | 0.25945300  | 1.04555700  |
| C                                                      | 3.15177100                  | -1.02793400 | -0.81881800 |
| C                                                      | 3.25623800                  | -0.32572100 | 1.87433500  |
| H                                                      | 1.63736600                  | 1.00267500  | 1.46685000  |
| C                                                      | 4.09702800                  | -1.61533600 | 0.01219200  |
| H                                                      | 3.11658500                  | -1.29549300 | -1.86929400 |
| C                                                      | 4.14961600                  | -1.26574000 | 1.36130500  |
| H                                                      | 3.30775800                  | -0.04106700 | 2.91826000  |
| H                                                      | 4.79723500                  | -2.33645100 | -0.39149100 |
| H                                                      | 1.64606400                  | 0.57879300  | -2.26812400 |
| C                                                      | -0.91759900                 | -0.51668400 | -0.72733500 |
| C                                                      | -1.25489100                 | 0.54183900  | 0.12496800  |
| H                                                      | 4.89055100                  | -1.71763200 | 2.00989800  |
| H                                                      | 1.41675100                  | 2.52747300  | -0.57349600 |
| O                                                      | -0.02344900                 | 2.31932700  | -2.08741000 |



|                                                        |                             |             |             |
|--------------------------------------------------------|-----------------------------|-------------|-------------|
| H                                                      | -0.22276200                 | 3.25815900  | -1.98888900 |
| H                                                      | -1.48108500                 | -2.47753400 | -1.49486600 |
| O                                                      | -2.80464000                 | 1.37942200  | 1.70778500  |
| H                                                      | -2.12341500                 | 2.11512100  | 1.65318500  |
| Frequency and Energy at B3LYP/6-311G(d,p) in gas phase |                             |             |             |
| Zero-point correction=                                 | 0.242985 (Hartree/Particle) |             |             |
| Thermal correction to Energy=                          | 0.259255                    |             |             |
| Thermal correction to Enthalpy=                        | 0.260199                    |             |             |
| Thermal correction to Gibbs Free Energy=               | 0.198067                    |             |             |
| Sum of electronic and zero-point Energies=             | -954.659910                 |             |             |
| Sum of electronic and thermal Energies=                | -954.643640                 |             |             |
| Sum of electronic and thermal Enthalpies=              | -954.642696                 |             |             |
| Sum of electronic and thermal Free Energies=           | -954.704829                 |             |             |

| Name of compound (7)                                   | Pinocembrin                 |             |             |
|--------------------------------------------------------|-----------------------------|-------------|-------------|
| Cartesian Coordinates optimized at B3LYP/6-311G(d,p)   |                             |             |             |
| O                                                      | -0.28454800                 | -0.83259600 | 0.00847400  |
| O                                                      | 1.27142300                  | 2.95043100  | -0.32298800 |
| O                                                      | 3.65455200                  | 1.93966200  | -0.08083200 |
| O                                                      | 3.96337500                  | -2.79360600 | 0.21471200  |
| C                                                      | -1.09042600                 | 0.29835600  | 0.40529800  |
| C                                                      | -0.67144800                 | 1.54440400  | -0.38037700 |
| C                                                      | 1.64125100                  | 0.63466300  | -0.03978800 |
| C                                                      | -2.54482500                 | -0.06202800 | 0.21247600  |
| C                                                      | 0.81487000                  | 1.80420900  | -0.23780800 |
| C                                                      | 1.06307700                  | -0.65823800 | 0.03283300  |
| C                                                      | 3.06100400                  | 0.74513100  | -0.00936400 |
| C                                                      | 1.84686100                  | -1.79504600 | 0.11446600  |
| C                                                      | -3.50770900                 | 0.48720800  | 1.06266600  |
| C                                                      | -2.95303300                 | -0.89896400 | -0.82892900 |
| C                                                      | 3.85192900                  | -0.39683500 | 0.07823400  |
| C                                                      | 3.23944400                  | -1.65007800 | 0.13087100  |
| C                                                      | -4.85993200                 | 0.21634300  | 0.86925700  |
| C                                                      | -4.30488200                 | -1.17606100 | -1.01684300 |
| C                                                      | -5.26175500                 | -0.61687700 | -0.17226100 |
| H                                                      | -0.90016300                 | 0.47352400  | 1.47225100  |
| H                                                      | -1.22279700                 | 2.42374000  | -0.04330600 |
| H                                                      | -0.89631000                 | 1.40055100  | -1.44399800 |
| H                                                      | 1.39545100                  | -2.77487500 | 0.17940000  |
| H                                                      | -3.19938400                 | 1.12674000  | 1.88398300  |
| H                                                      | -2.20865000                 | -1.34480500 | -1.47662300 |
| H                                                      | 4.93040100                  | -0.28891100 | 0.09465800  |
| H                                                      | -5.59697000                 | 0.64784300  | 1.53703100  |
| H                                                      | -4.61075600                 | -1.83276500 | -1.82357400 |
| H                                                      | -6.31335300                 | -0.83448500 | -0.32059900 |
| H                                                      | 2.93537200                  | 2.61316900  | -0.17249200 |
| H                                                      | 4.90217700                  | -2.57798000 | 0.23395700  |
| Frequency and Energy at B3LYP/6-311G(d,p) in gas phase |                             |             |             |
| Zero-point correction=                                 | 0.239768 (Hartree/Particle) |             |             |
| Thermal correction to Energy=                          | 0.254630                    |             |             |
| Thermal correction to Enthalpy=                        | 0.255574                    |             |             |
| Thermal correction to Gibbs Free Energy=               | 0.196995                    |             |             |
| Sum of electronic and zero-point Energies=             | -879.719598                 |             |             |
| Sum of electronic and thermal Energies=                | -879.704737                 |             |             |

|                                                        |             |             |             |                             |
|--------------------------------------------------------|-------------|-------------|-------------|-----------------------------|
| Sum of electronic and thermal Enthalpies=              |             |             |             | -879.703792                 |
| Sum of electronic and thermal Free Energies=           |             |             |             | -879.762372                 |
| <b>Name of radical</b>                                 |             |             | O7-H        |                             |
| Cartesian Coordinates optimized at B3LYP/6-311G(d,p)   |             |             |             |                             |
| O                                                      | -0.27083000 | -0.85261300 | -0.02335700 |                             |
| O                                                      | 1.34227600  | 2.89634900  | -0.32085400 |                             |
| O                                                      | 3.72629900  | 1.88194200  | -0.05947400 |                             |
| O                                                      | 3.99214900  | -2.79411900 | 0.23070900  |                             |
| C                                                      | -1.05551100 | 0.28471700  | 0.39401500  |                             |
| C                                                      | -0.61815000 | 1.52201400  | -0.39496800 |                             |
| C                                                      | 1.69764000  | 0.57454500  | -0.05239600 |                             |
| C                                                      | -2.51720200 | -0.04790900 | 0.20985900  |                             |
| C                                                      | 0.86794700  | 1.76096800  | -0.24988800 |                             |
| C                                                      | 1.08292900  | -0.71809600 | 0.02351100  |                             |
| C                                                      | 3.12468900  | 0.68724300  | -0.00071100 |                             |
| C                                                      | 1.84075800  | -1.85493600 | 0.11624200  |                             |
| C                                                      | -3.46092900 | 0.49490900  | 1.08495600  |                             |
| C                                                      | -2.94876100 | -0.85254100 | -0.84748100 |                             |
| C                                                      | 3.89912700  | -0.45367700 | 0.09456100  |                             |
| C                                                      | 3.28759800  | -1.76309500 | 0.14735100  |                             |
| C                                                      | -4.81922400 | 0.24928600  | 0.90033500  |                             |
| C                                                      | -4.30660400 | -1.10466700 | -1.02599700 |                             |
| C                                                      | -5.24490400 | -0.55179000 | -0.15666200 |                             |
| H                                                      | -0.85517900 | 0.45103500  | 1.46052600  |                             |
| H                                                      | -1.15523300 | 2.41385300  | -0.06855700 |                             |
| H                                                      | -0.84103800 | 1.37120600  | -1.45819400 |                             |
| H                                                      | 1.38021200  | -2.83155700 | 0.17561200  |                             |
| H                                                      | -3.13383100 | 1.10836900  | 1.91877800  |                             |
| H                                                      | -2.21925400 | -1.29482800 | -1.51438500 |                             |
| H                                                      | 4.97836600  | -0.38523600 | 0.12475500  |                             |
| H                                                      | -5.54205300 | 0.67469000  | 1.58709100  |                             |
| H                                                      | -4.63165000 | -1.73711700 | -1.84435000 |                             |
| H                                                      | -6.30118400 | -0.75010600 | -0.29793700 |                             |
| H                                                      | 3.02526900  | 2.56538500  | -0.15589000 |                             |
| Frequency and Energy at B3LYP/6-311G(d,p) in gas phase |             |             |             |                             |
| Zero-point correction=                                 |             |             |             | 0.225823 (Hartree/Particle) |
| Thermal correction to Energy=                          |             |             |             | 0.240571                    |
| Thermal correction to Enthalpy=                        |             |             |             | 0.241516                    |
| Thermal correction to Gibbs Free Energy=               |             |             |             | 0.182244                    |
| Sum of electronic and zero-point Energies=             |             |             |             | -879.078281                 |
| Sum of electronic and thermal Energies=                |             |             |             | -879.063532                 |
| Sum of electronic and thermal Enthalpies=              |             |             |             | -879.062588                 |
| Sum of electronic and thermal Free Energies=           |             |             |             | -879.121860                 |
| <b>Name of radical</b>                                 |             |             | C2-H        |                             |
| Cartesian Coordinates optimized at B3LYP/6-311G(d,p)   |             |             |             |                             |
| O                                                      | 0.29372200  | -0.76729600 | 0.35404600  |                             |
| O                                                      | -1.29124300 | 2.98078700  | -0.11801500 |                             |
| O                                                      | -3.64245700 | 1.89655600  | -0.41168800 |                             |
| O                                                      | -3.89042700 | -2.83011600 | 0.03532900  |                             |
| C                                                      | 1.15251800  | 0.30340500  | 0.25583400  |                             |
| C                                                      | 0.61130700  | 1.67484300  | 0.49790600  |                             |
| C                                                      | -1.63435000 | 0.65163500  | 0.00013600  |                             |
| C                                                      | 2.51986600  | -0.03038900 | 0.07376600  |                             |
| C                                                      | -0.83799800 | 1.84815100  | 0.07952300  |                             |

|                                                        |                             |             |             |
|--------------------------------------------------------|-----------------------------|-------------|-------------|
| C                                                      | -1.05052800                 | -0.61989200 | 0.19644100  |
| C                                                      | -3.04131200                 | 0.72148900  | -0.21254400 |
| C                                                      | -1.80664800                 | -1.77738200 | 0.21230200  |
| C                                                      | 3.53155000                  | 0.96777400  | 0.08121900  |
| C                                                      | 2.92937200                  | -1.37819100 | -0.12296500 |
| C                                                      | -3.80992300                 | -0.43870100 | -0.20041100 |
| C                                                      | -3.18870200                 | -1.67074300 | 0.01553900  |
| C                                                      | 4.86250800                  | 0.63309100  | -0.10664100 |
| C                                                      | 4.26385900                  | -1.69420700 | -0.30636400 |
| C                                                      | 5.24390600                  | -0.69655500 | -0.30247600 |
| H                                                      | 1.19984700                  | 2.42955500  | -0.02540400 |
| H                                                      | 0.65798300                  | 1.94124400  | 1.56866200  |
| H                                                      | -1.34487500                 | -2.74380700 | 0.35566700  |
| H                                                      | 3.26969000                  | 2.00598200  | 0.24192600  |
| H                                                      | 2.18032800                  | -2.15802000 | -0.13034600 |
| H                                                      | -4.87955600                 | -0.36095600 | -0.35747700 |
| H                                                      | 5.61351400                  | 1.41527300  | -0.09696400 |
| H                                                      | 4.54910700                  | -2.72978700 | -0.45601100 |
| H                                                      | 6.28690800                  | -0.95153400 | -0.44799700 |
| H                                                      | -2.93918800                 | 2.59138100  | -0.37713000 |
| H                                                      | -4.82306000                 | -2.64476100 | -0.11988600 |
| Frequency and Energy at B3LYP/6-311G(d,p) in gas phase |                             |             |             |
| Zero-point correction=                                 | 0.226153 (Hartree/Particle) |             |             |
| Thermal correction to Energy=                          | 0.241175                    |             |             |
| Thermal correction to Enthalpy=                        | 0.242119                    |             |             |
| Thermal correction to Gibbs Free Energy=               | 0.182621                    |             |             |
| Sum of electronic and zero-point Energies=             | -879.092199                 |             |             |
| Sum of electronic and thermal Energies=                | -879.077177                 |             |             |
| Sum of electronic and thermal Enthalpies=              | -879.076233                 |             |             |
| Sum of electronic and thermal Free Energies=           | -879.135731                 |             |             |
| <b>Name of anion</b>                                   | O7-H                        |             |             |
| Cartesian Coordinates optimized at B3LYP/6-311G(d,p)   |                             |             |             |
| O                                                      | -0.27732600                 | -0.85060800 | -0.08759900 |
| O                                                      | 1.32484500                  | 2.93615100  | -0.35334500 |
| O                                                      | 3.70245900                  | 1.90493200  | -0.05638500 |
| O                                                      | 4.00417800                  | -2.81260100 | 0.25250300  |
| C                                                      | -1.03881800                 | 0.26214200  | 0.37362700  |
| C                                                      | -0.61709300                 | 1.53515600  | -0.36690300 |
| C                                                      | 1.67836100                  | 0.60597300  | -0.06375000 |
| C                                                      | -2.50964000                 | -0.05830500 | 0.20388600  |
| C                                                      | 0.88703400                  | 1.75948000  | -0.25593000 |
| C                                                      | 1.10198600                  | -0.70667400 | -0.00353900 |
| C                                                      | 3.12184500                  | 0.68004000  | 0.00235500  |
| C                                                      | 1.85283600                  | -1.83526100 | 0.10495400  |
| C                                                      | -3.46850300                 | 0.70711000  | 0.87656000  |
| C                                                      | -2.94168800                 | -1.09194600 | -0.63051000 |
| C                                                      | 3.89097200                  | -0.44677700 | 0.11055000  |
| C                                                      | 3.31376700                  | -1.77883200 | 0.15929000  |
| C                                                      | -4.82755600                 | 0.45489000  | 0.71249600  |
| C                                                      | -4.30265800                 | -1.34665500 | -0.79373600 |
| C                                                      | -5.25111900                 | -0.57497200 | -0.12666500 |
| H                                                      | -0.83052500                 | 0.40347400  | 1.44532900  |
| H                                                      | -1.12795300                 | 2.41383500  | 0.03546700  |
| H                                                      | -0.89194600                 | 1.44777400  | -1.42523100 |

|                                                        |                             |             |             |
|--------------------------------------------------------|-----------------------------|-------------|-------------|
| H                                                      | 1.37908500                  | -2.80832800 | 0.15859100  |
| H                                                      | -3.14626900                 | 1.50568700  | 1.53794900  |
| H                                                      | -2.19907200                 | -1.69552200 | -1.13523600 |
| H                                                      | 4.97066500                  | -0.35971900 | 0.15345100  |
| H                                                      | -5.55596500                 | 1.05853700  | 1.24416900  |
| H                                                      | -4.62147900                 | -2.15551300 | -1.44326500 |
| H                                                      | -6.30965500                 | -0.77626400 | -0.25378500 |
| H                                                      | 2.96151900                  | 2.55082200  | -0.17493800 |
| Frequency and Energy at B3LYP/6-311G(d,p) in gas phase |                             |             |             |
| Zero-point correction=                                 | 0.226410 (Hartree/Particle) |             |             |
| Thermal correction to Energy=                          | 0.240981                    |             |             |
| Thermal correction to Enthalpy=                        | 0.241925                    |             |             |
| Thermal correction to Gibbs Free Energy=               | 0.183834                    |             |             |
| Sum of electronic and zero-point Energies=             | -879.189832                 |             |             |
| Sum of electronic and thermal Energies=                | -879.175261                 |             |             |
| Sum of electronic and thermal Enthalpies=              | -879.174317                 |             |             |
| Sum of electronic and thermal Free Energies=           | -879.232408                 |             |             |
| <b>Name of anion</b>                                   |                             | C2-H        |             |
| Cartesian Coordinates optimized at B3LYP/6-311G(d,p)   |                             |             |             |
| O                                                      | 0.23934300                  | -0.83548300 | 0.55891900  |
| O                                                      | -1.06407700                 | 2.95265600  | -0.19941900 |
| O                                                      | -3.39548500                 | 1.98274800  | -0.73007100 |
| O                                                      | -4.06317000                 | -2.68954000 | 0.04388300  |
| C                                                      | 1.12034600                  | 0.26620400  | 0.43125600  |
| C                                                      | 0.57623100                  | 1.56148300  | 0.92690700  |
| C                                                      | -1.54941200                 | 0.64543600  | 0.00395600  |
| C                                                      | 2.45088600                  | -0.05973400 | 0.13472700  |
| C                                                      | -0.71973600                 | 1.80785600  | 0.18069800  |
| C                                                      | -1.06008200                 | -0.64674000 | 0.33087200  |
| C                                                      | -2.91693100                 | 0.77595900  | -0.37447300 |
| C                                                      | -1.91568400                 | -1.75844400 | 0.36375900  |
| C                                                      | 3.50956600                  | 0.90947800  | 0.15531900  |
| C                                                      | 2.85195100                  | -1.39345500 | -0.21780800 |
| C                                                      | -3.76134400                 | -0.32523400 | -0.35197300 |
| C                                                      | -3.24610500                 | -1.57996700 | 0.02455200  |
| C                                                      | 4.81237400                  | 0.57617500  | -0.17245800 |
| C                                                      | 4.16361200                  | -1.70220400 | -0.52704300 |
| C                                                      | 5.17520800                  | -0.73120900 | -0.51959600 |
| H                                                      | 1.25483800                  | 2.38233100  | 0.69410600  |
| H                                                      | 0.38836700                  | 1.60313000  | 2.02532200  |
| H                                                      | -1.53041700                 | -2.73998900 | 0.60469500  |
| H                                                      | 3.28862900                  | 1.93352100  | 0.43523300  |
| H                                                      | 2.09627900                  | -2.16840100 | -0.24313300 |
| H                                                      | -4.80366400                 | -0.20066900 | -0.62831200 |
| H                                                      | 5.57150400                  | 1.35522200  | -0.14573000 |
| H                                                      | 4.40946800                  | -2.72984900 | -0.78722900 |
| H                                                      | 6.19998300                  | -0.98338300 | -0.76966000 |
| H                                                      | -2.61686500                 | 2.60462800  | -0.65387000 |
| H                                                      | -4.93627800                 | -2.41320600 | -0.25008900 |
| Frequency and Energy at B3LYP/6-311G(d,p) in gas phase |                             |             |             |
| Zero-point correction=                                 | 0.223504 (Hartree/Particle) |             |             |
| Thermal correction to Energy=                          | 0.238650                    |             |             |
| Thermal correction to Enthalpy=                        | 0.239594                    |             |             |
| Thermal correction to Gibbs Free Energy=               | 0.181006                    |             |             |

|                                                        |                                     |
|--------------------------------------------------------|-------------------------------------|
| Sum of electronic and zero-point Energies=             | -879.141089                         |
| Sum of electronic and thermal Energies=                | -879.125943                         |
| Sum of electronic and thermal Enthalpies=              | -879.124999                         |
| Sum of electronic and thermal Free Energies=           | -879.183587                         |
| <b>Name of cationic radical</b>                        |                                     |
| Cartesian Coordinates optimized at B3LYP/6-311G(d,p)   |                                     |
| O                                                      | -0.27548700 -0.77511700 0.18267000  |
| O                                                      | 1.37724900 2.97241700 -0.12626100   |
| O                                                      | 3.67494100 1.83911800 -0.05056500   |
| O                                                      | 3.85341400 -2.90545900 -0.01210200  |
| C                                                      | -1.14013100 0.41232100 0.50219500   |
| C                                                      | -0.64484000 1.65773400 -0.23737300  |
| C                                                      | 1.63229500 0.64937300 0.04049800    |
| C                                                      | -2.55774600 0.01992300 0.21183700   |
| C                                                      | 0.84173500 1.86753400 -0.08291000   |
| C                                                      | 1.02044400 -0.60587400 0.08590900   |
| C                                                      | 3.04863600 0.70036000 -0.00261800   |
| C                                                      | 1.80433900 -1.80735400 0.04589700   |
| C                                                      | -3.48398100 -0.03525500 1.25482100  |
| C                                                      | -2.96650200 -0.28307400 -1.09331600 |
| C                                                      | 3.83892300 -0.49335900 -0.00869400  |
| C                                                      | 3.21306500 -1.73365000 0.00609800   |
| C                                                      | -4.81050900 -0.37480600 0.99679200  |
| C                                                      | -4.28770600 -0.63542200 -1.34643800 |
| C                                                      | -5.21170100 -0.67642900 -0.30276600 |
| H                                                      | -0.99918900 0.54171000 1.57908700   |
| H                                                      | -1.17986000 2.53359500 0.13361700   |
| H                                                      | -0.85917900 1.58376700 -1.30985500  |
| H                                                      | 1.30621200 -2.76860400 0.06468100   |
| H                                                      | -3.17378800 0.18935900 2.26987200   |
| H                                                      | -2.25629400 -0.25776700 -1.91277400 |
| H                                                      | 4.91713400 -0.38655500 -0.03708000  |
| H                                                      | -5.52599200 -0.40868100 1.80934900  |
| H                                                      | -4.59761800 -0.87572100 -2.35623800 |
| H                                                      | -6.24218500 -0.94448300 -0.50282700 |
| H                                                      | 2.97884400 2.57092800 -0.06851300   |
| H                                                      | 4.81306100 -2.79736300 -0.03886500  |
| Frequency and Energy at B3LYP/6-311G(d,p) in gas phase |                                     |
| Zero-point correction=                                 | 0.237985 (Hartree/Particle)         |
| Thermal correction to Energy=                          | 0.253101                            |
| Thermal correction to Enthalpy=                        | 0.254045                            |
| Thermal correction to Gibbs Free Energy=               | 0.194228                            |
| Sum of electronic and zero-point Energies=             | -879.433957                         |
| Sum of electronic and thermal Energies=                | -879.418841                         |
| Sum of electronic and thermal Enthalpies=              | -879.417897                         |
| Sum of electronic and thermal Free Energies=           | -879.477714                         |

|                                                      |                                     |
|------------------------------------------------------|-------------------------------------|
| <b>Name of compound (8)</b>                          | <b>Catechin</b>                     |
| Cartesian Coordinates optimized at B3LYP/6-311G(d,p) |                                     |
| C                                                    | -2.94473800 0.16853700 1.28940700   |
| C                                                    | -3.91373800 -0.72221000 0.82868600  |
| C                                                    | -3.75871400 -1.29649200 -0.43694100 |
| C                                                    | -2.65575200 -0.99191200 -1.22305600 |
| H                                                    | -4.77510800 -0.96493100 1.44554300  |

|                                                        |             |                             |             |
|--------------------------------------------------------|-------------|-----------------------------|-------------|
| C                                                      | -0.77706000 | 1.46793600                  | 1.01057600  |
| C                                                      | 0.43158500  | 0.99467600                  | -1.14676600 |
| C                                                      | -0.04374900 | 2.08719200                  | -0.17879600 |
| O                                                      | -0.64628900 | 0.14287200                  | -1.56474300 |
| O                                                      | -4.67167600 | -2.17602600                 | -0.94892800 |
| H                                                      | -5.38615100 | -2.29442300                 | -0.31547400 |
| C                                                      | 1.59976800  | 0.18826200                  | -0.60101000 |
| C                                                      | 1.47421500  | -1.15387300                 | -0.25199800 |
| C                                                      | 2.84627300  | 0.81410900                  | -0.46610600 |
| C                                                      | 2.57442900  | -1.85829600                 | 0.24359900  |
| H                                                      | 0.52770800  | -1.66148100                 | -0.37495300 |
| C                                                      | 3.94266400  | 0.12090900                  | 0.02536200  |
| H                                                      | 2.99104900  | 1.84981800                  | -0.75363000 |
| C                                                      | 3.80036500  | -1.22851000                 | 0.38530900  |
| H                                                      | 2.47203700  | -2.90506700                 | 0.51500600  |
| H                                                      | 0.74191700  | 1.49598500                  | -2.06684500 |
| O                                                      | 4.94583300  | -1.82910800                 | 0.85914700  |
| H                                                      | 4.77627200  | -2.75723200                 | 1.04608700  |
| C                                                      | -1.69836700 | -0.10112900                 | -0.73289700 |
| C                                                      | -1.82003600 | 0.49602300                  | 0.52731000  |
| H                                                      | 0.83906400  | 2.63379800                  | 0.17483000  |
| O                                                      | -0.88276100 | 2.94846400                  | -0.94513500 |
| H                                                      | -1.38287300 | 3.49974600                  | -0.33585900 |
| O                                                      | 5.14707800  | 0.74517300                  | 0.14836100  |
| H                                                      | 5.77903700  | 0.09760100                  | 0.48614300  |
| H                                                      | -2.53839900 | -1.43016300                 | -2.20448200 |
| O                                                      | -3.04595800 | 0.76837300                  | 2.51818700  |
| H                                                      | -3.87117300 | 0.49873000                  | 2.93292500  |
| H                                                      | -0.04701100 | 0.97423900                  | 1.66316300  |
| H                                                      | -1.23903300 | 2.25405300                  | 1.61636500  |
| Frequency and Energy at B3LYP/6-311G(d,p) in gas phase |             |                             |             |
| Zero-point correction=                                 |             | 0.270012 (Hartree/Particle) |             |
| Thermal correction to Energy=                          |             | 0.288697                    |             |
| Thermal correction to Enthalpy=                        |             | 0.289642                    |             |
| Thermal correction to Gibbs Free Energy=               |             | 0.223079                    |             |
| Sum of electronic and zero-point Energies=             |             | -1031.353587                |             |
| Sum of electronic and thermal Energies=                |             | -1031.334902                |             |
| Sum of electronic and thermal Enthalpies=              |             | -1031.333958                |             |
| Sum of electronic and thermal Free Energies=           |             | -1031.400521                |             |
| <b>Name of radical</b>                                 |             |                             | O4'-H       |
| Cartesian Coordinates optimized at B3LYP/6-311G(d,p)   |             |                             |             |
| C                                                      | -2.91495000 | 0.18118800                  | 1.27451500  |
| C                                                      | -3.88414600 | -0.70268400                 | 0.80258100  |
| C                                                      | -3.72158000 | -1.27629200                 | -0.46256800 |
| C                                                      | -2.60909400 | -0.97690500                 | -1.23838900 |
| H                                                      | -4.75262200 | -0.94107900                 | 1.41081600  |
| C                                                      | -0.73851600 | 1.46938400                  | 1.01937100  |
| C                                                      | 0.48819600  | 0.98393200                  | -1.12711200 |
| C                                                      | 0.01704900  | 2.08287400                  | -0.15868000 |
| O                                                      | -0.58609300 | 0.14249100                  | -1.55803100 |
| O                                                      | -4.63317100 | -2.14814400                 | -0.98503200 |
| H                                                      | -5.35208000 | -2.27183900                 | -0.35747100 |
| C                                                      | 1.64899900  | 0.17507000                  | -0.57861600 |
| C                                                      | 1.47905600  | -1.17538000                 | -0.16533000 |

|                                                        |                             |             |             |
|--------------------------------------------------------|-----------------------------|-------------|-------------|
| C                                                      | 2.90561300                  | 0.78390800  | -0.49841800 |
| C                                                      | 2.52471800                  | -1.90280500 | 0.34085900  |
| H                                                      | 0.50279700                  | -1.63027800 | -0.26446400 |
| C                                                      | 3.97747800                  | 0.07008000  | 0.00783100  |
| H                                                      | 3.06003100                  | 1.80316700  | -0.83495200 |
| C                                                      | 3.83360300                  | -1.31919900 | 0.45845500  |
| H                                                      | 2.40515300                  | -2.93140800 | 0.65890400  |
| H                                                      | 0.81625000                  | 1.48827300  | -2.04002000 |
| O                                                      | 4.85454300                  | -1.89198900 | 0.90263800  |
| C                                                      | -1.65302100                 | -0.09331700 | -0.73647300 |
| C                                                      | -1.78100100                 | 0.50322700  | 0.52241300  |
| H                                                      | 0.90304300                  | 2.61753400  | 0.20531200  |
| O                                                      | -0.79929900                 | 2.95074200  | -0.93770800 |
| H                                                      | -1.31686100                 | 3.49736100  | -0.33867100 |
| O                                                      | 5.20059300                  | 0.58654600  | 0.11435100  |
| H                                                      | 5.73760300                  | -0.14117700 | 0.49444600  |
| H                                                      | -2.48447600                 | -1.41550100 | -2.21868800 |
| O                                                      | -3.02127900                 | 0.78035000  | 2.50157100  |
| H                                                      | -3.84683800                 | 0.51075600  | 2.91595200  |
| H                                                      | -0.02383700                 | 0.97516300  | 1.68898200  |
| H                                                      | -1.20493400                 | 2.26058200  | 1.61490700  |
| Frequency and Energy at B3LYP/6-311G(d,p) in gas phase |                             |             |             |
| Zero-point correction=                                 | 0.258209 (Hartree/Particle) |             |             |
| Thermal correction to Energy=                          | 0.276185                    |             |             |
| Thermal correction to Enthalpy=                        | 0.277129                    |             |             |
| Thermal correction to Gibbs Free Energy=               | 0.211058                    |             |             |
| Sum of electronic and zero-point Energies=             | -1030.737363                |             |             |
| Sum of electronic and thermal Energies=                | -1030.719388                |             |             |
| Sum of electronic and thermal Enthalpies=              | -1030.718444                |             |             |
| Sum of electronic and thermal Free Energies=           | -1030.784514                |             |             |
| <b>Name of radical</b>                                 | C2-H                        |             |             |
| Cartesian Coordinates optimized at B3LYP/6-311G(d,p)   |                             |             |             |
| C                                                      | -3.74147100                 | -0.81810200 | -0.36712000 |
| C                                                      | -4.57210900                 | 0.27040700  | -0.09694800 |
| C                                                      | -4.00215600                 | 1.51302500  | 0.19870000  |
| C                                                      | -2.62155800                 | 1.66916700  | 0.23145300  |
| H                                                      | -5.65228600                 | 0.15318300  | -0.12318700 |
| C                                                      | -1.41069300                 | -1.83417000 | -0.65678100 |
| C                                                      | 0.42578700                  | -0.27833400 | -0.00654700 |
| C                                                      | -0.11314900                 | -1.66748300 | 0.14331500  |
| O                                                      | -0.46893800                 | 0.77409300  | -0.01020200 |
| O                                                      | -4.76277500                 | 2.61346600  | 0.47052300  |
| H                                                      | -5.69447100                 | 2.37729300  | 0.42362700  |
| C                                                      | 1.79442500                  | 0.09961800  | -0.04893500 |
| C                                                      | 2.17443000                  | 1.45281700  | -0.24611700 |
| C                                                      | 2.82865300                  | -0.86362200 | 0.10232700  |
| C                                                      | 3.51307900                  | 1.81107200  | -0.30233800 |
| H                                                      | 1.40946200                  | 2.20723800  | -0.35954400 |
| C                                                      | 4.15837700                  | -0.49751700 | 0.04273000  |
| H                                                      | 2.60654300                  | -1.90352400 | 0.29949600  |
| C                                                      | 4.50865200                  | 0.84980300  | -0.16356600 |
| H                                                      | 3.78958600                  | 2.85013000  | -0.45877200 |
| O                                                      | 5.86095800                  | 1.10602900  | -0.20491100 |
| H                                                      | 6.01228700                  | 2.04850400  | -0.32322300 |

|                                                        |             |                             |             |
|--------------------------------------------------------|-------------|-----------------------------|-------------|
| C                                                      | -1.82236500 | 0.56143000                  | -0.04465600 |
| C                                                      | -2.34786000 | -0.69770500                 | -0.34673200 |
| H                                                      | 0.62742900  | -2.37691300                 | -0.22295000 |
| O                                                      | -0.30372200 | -2.03750100                 | 1.52321100  |
| H                                                      | -0.97652300 | -1.45328600                 | 1.89181900  |
| O                                                      | 5.13109900  | -1.44098700                 | 0.19414900  |
| H                                                      | 5.98467400  | -0.99305600                 | 0.14024400  |
| H                                                      | -2.17756200 | 2.62619100                  | 0.46721800  |
| O                                                      | -4.24555600 | -2.05061000                 | -0.67360800 |
| H                                                      | -5.20647800 | -2.02288800                 | -0.63004000 |
| H                                                      | -1.17737200 | -1.85934000                 | -1.72908800 |
| H                                                      | -1.86608100 | -2.79187400                 | -0.40159700 |
| Frequency and Energy at B3LYP/6-311G(d,p) in gas phase |             |                             |             |
| Zero-point correction=                                 |             | 0.256818 (Hartree/Particle) |             |
| Thermal correction to Energy=                          |             | 0.275669                    |             |
| Thermal correction to Enthalpy=                        |             | 0.276613                    |             |
| Thermal correction to Gibbs Free Energy=               |             | 0.209328                    |             |
| Sum of electronic and zero-point Energies=             |             | -1030.729196                |             |
| Sum of electronic and thermal Energies=                |             | -1030.710345                |             |
| Sum of electronic and thermal Enthalpies=              |             | -1030.709401                |             |
| Sum of electronic and thermal Free Energies=           |             | -1030.776687                |             |
| <b>Name of anion</b>                                   |             | O4'-H                       |             |
| Cartesian Coordinates optimized at B3LYP/6-311G(d,p)   |             |                             |             |
| C                                                      | -3.01038300 | 0.01029500                  | 1.21546800  |
| C                                                      | -3.95374900 | -0.82262000                 | 0.60906700  |
| C                                                      | -3.73324100 | -1.24246400                 | -0.70561300 |
| C                                                      | -2.59932100 | -0.84653400                 | -1.39496700 |
| H                                                      | -4.84179900 | -1.13794800                 | 1.15268000  |
| C                                                      | -0.84746800 | 1.34353900                  | 1.20351000  |
| C                                                      | 0.50448500  | 1.09517400                  | -0.91500400 |
| C                                                      | -0.04346100 | 2.07360200                  | 0.13669300  |
| O                                                      | -0.58944600 | 0.32560200                  | -1.50533800 |
| O                                                      | -4.62683700 | -2.06112100                 | -1.35833600 |
| H                                                      | -5.33405800 | -2.28303700                 | -0.74574200 |
| C                                                      | 1.65182900  | 0.24005400                  | -0.44764100 |
| C                                                      | 1.48999800  | -0.95783200                 | 0.24988100  |
| C                                                      | 2.97188600  | 0.70203400                  | -0.69149300 |
| C                                                      | 2.58763000  | -1.69284900                 | 0.71231400  |
| H                                                      | 0.49134100  | -1.34773900                 | 0.42413300  |
| C                                                      | 4.05197400  | -0.00859200                 | -0.22589600 |
| H                                                      | 3.14248100  | 1.62045400                  | -1.25047800 |
| C                                                      | 3.92021900  | -1.25422700                 | 0.50729800  |
| H                                                      | 2.43810600  | -2.63031600                 | 1.24036100  |
| H                                                      | 0.85964000  | 1.69881900                  | -1.76052400 |
| O                                                      | 5.00410800  | -1.82407200                 | 0.87509200  |
| C                                                      | -1.66547900 | -0.01365400                 | -0.76239500 |
| C                                                      | -1.85738700 | 0.43312100                  | 0.55502800  |
| H                                                      | 0.82060700  | 2.57120000                  | 0.59245300  |
| O                                                      | -0.91974200 | 3.04874100                  | -0.45271400 |
| H                                                      | -0.51278600 | 3.33389000                  | -1.27672300 |
| O                                                      | 5.35177100  | 0.36243300                  | -0.41504100 |
| H                                                      | 5.79718800  | -0.39538700                 | 0.04541300  |
| H                                                      | -2.42066200 | -1.18009300                 | -2.40797600 |
| O                                                      | -3.18495800 | 0.45354800                  | 2.50621600  |



|                                                        |                             |             |             |
|--------------------------------------------------------|-----------------------------|-------------|-------------|
| H                                                      | -4.01902200                 | 0.10646100  | 2.83535500  |
| H                                                      | -0.15642900                 | 0.77379200  | 1.83328900  |
| H                                                      | -1.34896900                 | 2.07459100  | 1.84121800  |
| Frequency and Energy at B3LYP/6-311G(d,p) in gas phase |                             |             |             |
| Zero-point correction=                                 | 0.256653 (Hartree/Particle) |             |             |
| Thermal correction to Energy=                          | 0.274705                    |             |             |
| Thermal correction to Enthalpy=                        | 0.275649                    |             |             |
| Thermal correction to Gibbs Free Energy=               | 0.209950                    |             |             |
| Sum of electronic and zero-point Energies=             | -1030.816671                |             |             |
| Sum of electronic and thermal Energies=                | -1030.798619                |             |             |
| Sum of electronic and thermal Enthalpies=              | -1030.797675                |             |             |
| Sum of electronic and thermal Free Energies=           | -1030.863374                |             |             |
| <b>Name of cationic radical</b>                        |                             |             |             |
| Cartesian Coordinates optimized at B3LYP/6-311G(d,p)   |                             |             |             |
| C                                                      | -2.68105900                 | -0.09065400 | 1.41809300  |
| C                                                      | -3.62912800                 | -0.96147600 | 0.92461400  |
| C                                                      | -3.59541300                 | -1.30497900 | -0.44906500 |
| C                                                      | -2.60933300                 | -0.80540500 | -1.30606200 |
| H                                                      | -4.40003700                 | -1.36973000 | 1.56994600  |
| C                                                      | -0.74205300                 | 1.51567000  | 1.08540300  |
| C                                                      | 0.40266800                  | 1.24783000  | -1.13722000 |
| C                                                      | -0.07594300                 | 2.25432600  | -0.06899400 |
| O                                                      | -0.71106600                 | 0.49426600  | -1.64946100 |
| O                                                      | -4.49240400                 | -2.13456700 | -0.98798200 |
| H                                                      | -5.14149800                 | -2.43055700 | -0.33694900 |
| C                                                      | 1.51188100                  | 0.32588300  | -0.66427000 |
| C                                                      | 1.34628300                  | -1.07219300 | -0.62056100 |
| C                                                      | 2.73606600                  | 0.87928000  | -0.29655500 |
| C                                                      | 2.37939200                  | -1.89958100 | -0.18543500 |
| H                                                      | 0.42320000                  | -1.52157000 | -0.95567400 |
| C                                                      | 3.77800900                  | 0.06284700  | 0.13712800  |
| H                                                      | 2.92305700                  | 1.94548000  | -0.34081700 |
| C                                                      | 3.59228000                  | -1.34733100 | 0.19663700  |
| H                                                      | 2.24176400                  | -2.97509000 | -0.15956100 |
| H                                                      | 0.75303300                  | 1.80109100  | -2.01310400 |
| O                                                      | 4.67507900                  | -2.03117000 | 0.63180500  |
| H                                                      | 4.52374200                  | -2.98382400 | 0.63418400  |
| C                                                      | -1.65635900                 | 0.05929000  | -0.79606000 |
| C                                                      | -1.67581100                 | 0.46545400  | 0.57075500  |
| H                                                      | 0.78768600                  | 2.81785800  | 0.29984700  |
| O                                                      | -1.06587900                 | 3.11458000  | -0.60527200 |
| H                                                      | -0.68145400                 | 3.66836100  | -1.29335200 |
| O                                                      | 4.94437500                  | 0.61041100  | 0.49454800  |
| H                                                      | 5.56216500                  | -0.08494500 | 0.76660600  |
| H                                                      | -2.59821400                 | -1.08964900 | -2.34899100 |
| O                                                      | -2.62839500                 | 0.32000900  | 2.69974400  |
| H                                                      | -3.35508400                 | -0.04849200 | 3.21656600  |
| H                                                      | 0.00018000                  | 1.07161500  | 1.75755000  |
| H                                                      | -1.30110400                 | 2.23745700  | 1.68624200  |
| Frequency and Energy at B3LYP/6-311G(d,p) in gas phase |                             |             |             |
| Zero-point correction=                                 | 0.270590 (Hartree/Particle) |             |             |
| Thermal correction to Energy=                          | 0.288688                    |             |             |
| Thermal correction to Enthalpy=                        | 0.289632                    |             |             |
| Thermal correction to Gibbs Free Energy=               | 0.223837                    |             |             |

|                                              |              |
|----------------------------------------------|--------------|
| Sum of electronic and zero-point Energies=   | -1031.092889 |
| Sum of electronic and thermal Energies=      | -1031.074792 |
| Sum of electronic and thermal Enthalpies=    | -1031.073848 |
| Sum of electronic and thermal Free Energies= | -1031.139643 |

| Name of compound (9)                                   |                             | Isomelacacidin |             |
|--------------------------------------------------------|-----------------------------|----------------|-------------|
| Cartesian Coordinates optimized at B3LYP/6-311G(d,p)   |                             |                |             |
| C                                                      | -2.95018900                 | 0.92141700     | 1.36325000  |
| C                                                      | -3.99407500                 | 0.00935100     | 1.25439100  |
| C                                                      | -3.92980200                 | -0.98474800    | 0.28285500  |
| C                                                      | -2.84000900                 | -1.07698400    | -0.58549300 |
| H                                                      | -2.98738400                 | 1.71506200     | 2.09734300  |
| H                                                      | -4.85409700                 | 0.07050400     | 1.91373900  |
| C                                                      | -0.69744300                 | 1.81699600     | 0.61961000  |
| C                                                      | 0.37050300                  | 0.55910900     | -1.30638900 |
| C                                                      | -0.01396200                 | 1.94470000     | -0.73823000 |
| O                                                      | -0.77878200                 | -0.29696200    | -1.37307400 |
| O                                                      | -2.77950400                 | -2.04661400    | -1.54073600 |
| H                                                      | -3.59539400                 | -2.55902700    | -1.47432800 |
| O                                                      | -4.90110100                 | -1.94326200    | 0.08533000  |
| H                                                      | -5.63666200                 | -1.78694000    | 0.68455200  |
| O                                                      | 1.09133400                  | 2.83882100     | -0.66794400 |
| H                                                      | 1.78833000                  | 2.40964600     | -0.15438700 |
| H                                                      | -0.72188100                 | 2.41367600     | -1.42617000 |
| C                                                      | 1.52369800                  | -0.11210600    | -0.57506200 |
| C                                                      | 1.31588600                  | -1.12210700    | 0.36352800  |
| C                                                      | 2.83626700                  | 0.29238100     | -0.86182400 |
| C                                                      | 2.40000100                  | -1.70506300    | 1.02134800  |
| H                                                      | 0.31521900                  | -1.47520700    | 0.57100300  |
| C                                                      | 3.91861300                  | -0.28123700    | -0.20561900 |
| H                                                      | 3.03985400                  | 1.03897800     | -1.62121400 |
| C                                                      | 3.69342100                  | -1.28639600    | 0.74697300  |
| H                                                      | 2.23311800                  | -2.49476300    | 1.74807100  |
| H                                                      | 0.66610000                  | 0.70320100     | -2.34795100 |
| O                                                      | 4.82798200                  | -1.79456600    | 1.33639700  |
| H                                                      | 4.59760600                  | -2.51622400    | 1.92928000  |
| C                                                      | -1.79655700                 | -0.14900200    | -0.46870200 |
| C                                                      | -1.84594600                 | 0.84715200     | 0.51498200  |
| O                                                      | 5.18379600                  | 0.12319700     | -0.49897400 |
| H                                                      | 5.79317800                  | -0.40375800    | 0.03410200  |
| H                                                      | 0.04456600                  | 1.43227100     | 1.33993600  |
| O                                                      | -1.16747500                 | 3.08363600     | 1.06198700  |
| H                                                      | -0.43498800                 | 3.69779900     | 0.92841300  |
| Frequency and Energy at B3LYP/6-311G(d,p) in gas phase |                             |                |             |
| Zero-point correction=                                 | 0.275406 (Hartree/Particle) |                |             |
| Thermal correction to Energy=                          | 0.294976                    |                |             |
| Thermal correction to Enthalpy=                        | 0.295921                    |                |             |
| Thermal correction to Gibbs Free Energy=               | 0.227811                    |                |             |
| Sum of electronic and zero-point Energies=             | -1106.582499                |                |             |
| Sum of electronic and thermal Energies=                | -1106.562929                |                |             |
| Sum of electronic and thermal Enthalpies=              | -1106.561985                |                |             |
| Sum of electronic and thermal Free Energies=           | -1106.630094                |                |             |
| Name of radical                                        |                             | O7-H           |             |
| Cartesian Coordinates optimized at B3LYP/6-311G(d,p)   |                             |                |             |

|                                                        |                             |             |             |
|--------------------------------------------------------|-----------------------------|-------------|-------------|
| C                                                      | -3.03353200                 | 0.88014400  | 1.35031000  |
| C                                                      | -4.06775700                 | -0.00761600 | 1.27491900  |
| C                                                      | -4.03000900                 | -1.06187800 | 0.29547500  |
| C                                                      | -2.86326800                 | -1.11987900 | -0.58750500 |
| H                                                      | -3.04880300                 | 1.69174500  | 2.06622900  |
| H                                                      | -4.93142400                 | 0.05061700  | 1.92484800  |
| C                                                      | -0.76335800                 | 1.77560600  | 0.61049900  |
| C                                                      | 0.34696200                  | 0.53803300  | -1.30883200 |
| C                                                      | -0.06395600                 | 1.91637400  | -0.74098900 |
| O                                                      | -0.79000800                 | -0.34041400 | -1.37498300 |
| O                                                      | -2.85694900                 | -2.09907500 | -1.48686500 |
| H                                                      | -3.70292400                 | -2.57016400 | -1.31998700 |
| O                                                      | -4.90818600                 | -1.93897900 | 0.12428300  |
| O                                                      | 1.02489700                  | 2.82498100  | -0.65064600 |
| H                                                      | 1.73455700                  | 2.39517200  | -0.15474500 |
| H                                                      | -0.77035400                 | 2.37908500  | -1.43474100 |
| C                                                      | 1.50913100                  | -0.11283100 | -0.57557500 |
| C                                                      | 1.31777700                  | -1.11191000 | 0.37805600  |
| C                                                      | 2.81515200                  | 0.30443800  | -0.87410900 |
| C                                                      | 2.41194000                  | -1.67339200 | 1.03813500  |
| H                                                      | 0.32352400                  | -1.47757600 | 0.59492000  |
| C                                                      | 3.90742500                  | -0.24718700 | -0.21546900 |
| H                                                      | 3.00652300                  | 1.04235100  | -1.64511100 |
| C                                                      | 3.69877700                  | -1.24277700 | 0.75187600  |
| H                                                      | 2.25780000                  | -2.45564100 | 1.77539100  |
| H                                                      | 0.63867100                  | 0.68676500  | -2.35046500 |
| O                                                      | 4.84169100                  | -1.72789900 | 1.34082100  |
| H                                                      | 4.62685300                  | -2.44668300 | 1.94316700  |
| C                                                      | -1.81813000                 | -0.19228500 | -0.48629500 |
| C                                                      | -1.90011300                 | 0.79844200  | 0.48807800  |
| O                                                      | 5.16461900                  | 0.16857600  | -0.52030800 |
| H                                                      | 5.78485000                  | -0.34369300 | 0.01481200  |
| H                                                      | -0.03019300                 | 1.38094100  | 1.33569300  |
| O                                                      | -1.24715600                 | 3.03163700  | 1.05850900  |
| H                                                      | -0.52257800                 | 3.65677600  | 0.93206200  |
| Frequency and Energy at B3LYP/6-311G(d,p) in gas phase |                             |             |             |
| Zero-point correction=                                 | 0.263644 (Hartree/Particle) |             |             |
| Thermal correction to Energy=                          | 0.282449                    |             |             |
| Thermal correction to Enthalpy=                        | 0.283394                    |             |             |
| Thermal correction to Gibbs Free Energy=               | 0.215905                    |             |             |
| Sum of electronic and zero-point Energies=             | -1105.966692                |             |             |
| Sum of electronic and thermal Energies=                | -1105.947887                |             |             |
| Sum of electronic and thermal Enthalpies=              | -1105.946943                |             |             |
| Sum of electronic and thermal Free Energies=           | -1106.014431                |             |             |
| <b>Name of radical</b>                                 | C4-H                        |             |             |
| Cartesian Coordinates optimized at B3LYP/6-311G(d,p)   |                             |             |             |
| C                                                      | -2.90679900                 | 0.86009500  | 1.38697700  |
| C                                                      | -3.82997500                 | -0.17014200 | 1.30901000  |
| C                                                      | -3.74062700                 | -1.10851900 | 0.28212200  |
| C                                                      | -2.71588700                 | -1.04070100 | -0.67774000 |
| H                                                      | -2.96985600                 | 1.60114600  | 2.17211300  |
| H                                                      | -4.62878400                 | -0.24736600 | 2.04055300  |
| C                                                      | -0.91325400                 | 1.99759400  | 0.42031200  |
| C                                                      | 0.37626700                  | 0.78197000  | -1.35005500 |

|                                                        |                             |             |             |
|--------------------------------------------------------|-----------------------------|-------------|-------------|
| C                                                      | 0.03569200                  | 2.16171700  | -0.72244100 |
| O                                                      | -0.82070300                 | 0.02621500  | -1.57488500 |
| O                                                      | -2.62514600                 | -1.97369900 | -1.66692900 |
| H                                                      | -3.36435400                 | -2.58331700 | -1.54786300 |
| O                                                      | -4.60617000                 | -2.17038900 | 0.11910000  |
| H                                                      | -5.28758600                 | -2.13953900 | 0.79681900  |
| O                                                      | 1.19651000                  | 2.89465400  | -0.31610400 |
| H                                                      | 1.76772000                  | 2.28554300  | 0.17305200  |
| H                                                      | -0.41279200                 | 2.78768300  | -1.50603900 |
| C                                                      | 1.43753100                  | 0.01237000  | -0.57928400 |
| C                                                      | 1.12938900                  | -0.88969300 | 0.44065000  |
| C                                                      | 2.78337800                  | 0.22667500  | -0.91263500 |
| C                                                      | 2.14880500                  | -1.56296400 | 1.11400100  |
| H                                                      | 0.10106600                  | -1.08699200 | 0.70812300  |
| C                                                      | 3.80296100                  | -0.43450000 | -0.23918500 |
| H                                                      | 3.05887100                  | 0.89994200  | -1.71656200 |
| C                                                      | 3.47726600                  | -1.33742600 | 0.78337200  |
| H                                                      | 1.90369400                  | -2.26897500 | 1.90205100  |
| H                                                      | 0.76304400                  | 0.96139900  | -2.35445300 |
| O                                                      | 4.55223600                  | -1.94859400 | 1.38546600  |
| H                                                      | 4.24705400                  | -2.58871000 | 2.03548400  |
| C                                                      | -1.78918700                 | -0.00884800 | -0.60488100 |
| C                                                      | -1.86898500                 | 0.97010400  | 0.42805900  |
| O                                                      | 5.10107000                  | -0.21346900 | -0.58205400 |
| H                                                      | 5.65316500                  | -0.77964300 | -0.02738800 |
| O                                                      | -0.95131700                 | 2.99486300  | 1.34426900  |
| H                                                      | -0.16252000                 | 3.53578200  | 1.18352600  |
| Frequency and Energy at B3LYP/6-311G(d,p) in gas phase |                             |             |             |
| Zero-point correction=                                 | 0.262250 (Hartree/Particle) |             |             |
| Thermal correction to Energy=                          | 0.281904                    |             |             |
| Thermal correction to Enthalpy=                        | 0.282848                    |             |             |
| Thermal correction to Gibbs Free Energy=               | 0.213695                    |             |             |
| Sum of electronic and zero-point Energies=             | -1105.959632                |             |             |
| Sum of electronic and thermal Energies=                | -1105.939978                |             |             |
| Sum of electronic and thermal Enthalpies=              | -1105.939034                |             |             |
| Sum of electronic and thermal Free Energies=           | -1106.008188                |             |             |
| <b>Name of anion</b>                                   | O7-H                        |             |             |
| Cartesian Coordinates optimized at B3LYP/6-311G(d,p)   |                             |             |             |
| C                                                      | 2.78707600                  | 0.68248200  | -1.51958400 |
| C                                                      | 3.74365900                  | -0.32562900 | -1.43412400 |
| C                                                      | 3.75426000                  | -1.23882000 | -0.34447000 |
| C                                                      | 2.72098000                  | -1.04355300 | 0.64958400  |
| H                                                      | 2.80169300                  | 1.37154400  | -2.35855100 |
| H                                                      | 4.50529400                  | -0.43793000 | -2.20005400 |
| C                                                      | 0.73579200                  | 1.90676200  | -0.67286800 |
| C                                                      | -0.32909500                 | 0.80616500  | 1.35550800  |
| C                                                      | 0.03402700                  | 2.13624400  | 0.65997900  |
| O                                                      | 0.84911100                  | 0.05844500  | 1.59616500  |
| O                                                      | 2.76045900                  | -1.95764400 | 1.66570100  |
| H                                                      | 3.54537300                  | -2.48150900 | 1.36288100  |
| O                                                      | 4.55808800                  | -2.21349900 | -0.15000200 |
| O                                                      | -1.09024500                 | 3.01536100  | 0.50355500  |
| H                                                      | -1.70279600                 | 2.57582100  | -0.09912200 |
| H                                                      | 0.72620700                  | 2.66927900  | 1.31534900  |

|                                                        |             |                             |             |
|--------------------------------------------------------|-------------|-----------------------------|-------------|
| C                                                      | -1.41152300 | -0.00230900                 | 0.64337900  |
| C                                                      | -1.10722000 | -1.17534100                 | -0.04983300 |
| C                                                      | -2.74985500 | 0.41411600                  | 0.71640000  |
| C                                                      | -2.11764800 | -1.89863100                 | -0.68291000 |
| H                                                      | -0.08533800 | -1.52657100                 | -0.08858500 |
| C                                                      | -3.75832400 | -0.30401000                 | 0.08508600  |
| H                                                      | -3.02896200 | 1.29232100                  | 1.28775500  |
| C                                                      | -3.43423900 | -1.46557000                 | -0.62382400 |
| H                                                      | -1.87352300 | -2.80901600                 | -1.22432300 |
| H                                                      | -0.71212500 | 1.05776200                  | 2.34982400  |
| O                                                      | -4.50238500 | -2.11806600                 | -1.21828500 |
| H                                                      | -4.18044300 | -2.91479500                 | -1.64959400 |
| C                                                      | 1.79042100  | -0.03114500                 | 0.55660100  |
| C                                                      | 1.80369100  | 0.86283100                  | -0.54250800 |
| O                                                      | -5.06067500 | 0.11547800                  | 0.16698800  |
| H                                                      | -5.59223000 | -0.52477100                 | -0.32205200 |
| H                                                      | -0.03972800 | 1.58391300                  | -1.39722400 |
| O                                                      | 1.27610300  | 3.15311500                  | -1.14601700 |
| H                                                      | 0.54092100  | 3.77688000                  | -1.09964000 |
| Frequency and Energy at B3LYP/6-311G(d,p) in gas phase |             |                             |             |
| Zero-point correction=                                 |             | 0.262209 (Hartree/Particle) |             |
| Thermal correction to Energy=                          |             | 0.281093                    |             |
| Thermal correction to Enthalpy=                        |             | 0.282037                    |             |
| Thermal correction to Gibbs Free Energy=               |             | 0.215202                    |             |
| Sum of electronic and zero-point Energies=             |             | -1106.042885                |             |
| Sum of electronic and thermal Energies=                |             | -1106.024001                |             |
| Sum of electronic and thermal Enthalpies=              |             | -1106.023057                |             |
| Sum of electronic and thermal Free Energies=           |             | -1106.089893                |             |
| <b>Name of anion</b>                                   |             | O4'-H                       |             |
| Cartesian Coordinates optimized at B3LYP/6-311G(d,p)   |             |                             |             |
| C                                                      | -3.03137400 | 1.09067500                  | 1.18852700  |
| C                                                      | -4.11147200 | 0.21624800                  | 1.12248100  |
| C                                                      | -4.02936900 | -0.89057900                 | 0.28254500  |
| C                                                      | -2.89727900 | -1.13294300                 | -0.49352300 |
| H                                                      | -3.06815400 | 1.96753000                  | 1.82164800  |
| H                                                      | -5.01081800 | 0.39280300                  | 1.70542200  |
| C                                                      | -0.68994800 | 1.78009800                  | 0.49424200  |
| C                                                      | 0.41216600  | 0.33654100                  | -1.26987800 |
| C                                                      | 0.01517500  | 1.77238700                  | -0.85822000 |
| O                                                      | -0.75587200 | -0.53806800                 | -1.22157700 |
| O                                                      | -2.83599700 | -2.21930900                 | -1.32142900 |
| H                                                      | -3.65160300 | -2.71529700                 | -1.18006700 |
| O                                                      | -5.04860600 | -1.82216900                 | 0.13439600  |
| H                                                      | -5.69492700 | -1.68407200                 | 0.83193700  |
| O                                                      | 1.14499800  | 2.63848700                  | -0.83072300 |
| H                                                      | 1.88488500  | 2.10896800                  | -0.48782600 |
| H                                                      | -0.67489400 | 2.19618800                  | -1.59604500 |
| C                                                      | 1.58741200  | -0.21390400                 | -0.50350600 |
| C                                                      | 1.46455700  | -0.87303200                 | 0.72188000  |
| C                                                      | 2.89568300  | 0.00342300                  | -1.02147200 |
| C                                                      | 2.58291600  | -1.30824400                 | 1.43907200  |
| H                                                      | 0.47497500  | -1.08145100                 | 1.11790700  |
| C                                                      | 3.99863400  | -0.40886500                 | -0.30891600 |
| H                                                      | 3.03537500  | 0.47427200                  | -1.99194000 |

|                                                        |                             |             |             |
|--------------------------------------------------------|-----------------------------|-------------|-------------|
| C                                                      | 3.90416700                  | -1.08779800 | 0.97085100  |
| H                                                      | 2.46119600                  | -1.83561100 | 2.38066100  |
| H                                                      | 0.67195500                  | 0.36578600  | -2.33165700 |
| O                                                      | 5.00255700                  | -1.42656800 | 1.52592300  |
| C                                                      | -1.81198500                 | -0.24166100 | -0.42785300 |
| C                                                      | -1.88358400                 | 0.86933900  | 0.42968800  |
| O                                                      | 5.28374300                  | -0.24471500 | -0.73056800 |
| H                                                      | 5.75548300                  | -0.66939600 | 0.03185300  |
| H                                                      | 0.02170200                  | 1.40465300  | 1.24393900  |
| O                                                      | -1.08372200                 | 3.10805600  | 0.84266900  |
| H                                                      | -0.29617900                 | 3.63980300  | 0.66913200  |
| Frequency and Energy at B3LYP/6-311G(d,p) in gas phase |                             |             |             |
| Zero-point correction=                                 | 0.262272 (Hartree/Particle) |             |             |
| Thermal correction to Energy=                          | 0.281158                    |             |             |
| Thermal correction to Enthalpy=                        | 0.282102                    |             |             |
| Thermal correction to Gibbs Free Energy=               | 0.214999                    |             |             |
| Sum of electronic and zero-point Energies=             | -1106.053375                |             |             |
| Sum of electronic and thermal Energies=                | -1106.034489                |             |             |
| Sum of electronic and thermal Enthalpies=              | -1106.033545                |             |             |
| Sum of electronic and thermal Free Energies=           | -1106.100648                |             |             |
| <b>Name of cationic radical</b>                        |                             |             |             |
| Cartesian Coordinates optimized at B3LYP/6-311G(d,p)   |                             |             |             |
| C                                                      | 3.10959200                  | 0.98437300  | -1.18182700 |
| C                                                      | 4.16305100                  | 0.05233500  | -1.06600000 |
| C                                                      | 4.02286900                  | -1.02578300 | -0.22434000 |
| C                                                      | 2.82346600                  | -1.18557400 | 0.52808800  |
| H                                                      | 3.22593800                  | 1.84166300  | -1.83219700 |
| H                                                      | 5.07409500                  | 0.19269400  | -1.63587800 |
| C                                                      | 0.79518900                  | 1.85311600  | -0.59351800 |
| C                                                      | -0.39140900                 | 0.50836500  | 1.21743300  |
| C                                                      | 0.05081500                  | 1.91358900  | 0.74261800  |
| O                                                      | 0.71224100                  | -0.44224500 | 1.18360800  |
| O                                                      | 2.66583700                  | -2.20411900 | 1.35535900  |
| H                                                      | 3.46765500                  | -2.75488900 | 1.34355900  |
| O                                                      | 4.92213200                  | -2.01236100 | 0.00285800  |
| H                                                      | 5.73704400                  | -1.88505700 | -0.49744900 |
| O                                                      | -1.03315400                 | 2.81723300  | 0.69365000  |
| H                                                      | -1.72367000                 | 2.45641900  | 0.12246400  |
| H                                                      | 0.73968900                  | 2.32867900  | 1.48298900  |
| C                                                      | -1.57739100                 | -0.08805600 | 0.49103200  |
| C                                                      | -1.42072000                 | -0.93523800 | -0.62051400 |
| C                                                      | -2.86074000                 | 0.20318300  | 0.95910500  |
| C                                                      | -2.53247500                 | -1.46051700 | -1.27015800 |
| H                                                      | -0.43426900                 | -1.20682100 | -0.97080200 |
| C                                                      | -3.98050700                 | -0.31330400 | 0.31431600  |
| H                                                      | -3.01735400                 | 0.82622200  | 1.83158500  |
| C                                                      | -3.81015000                 | -1.15595600 | -0.81477700 |
| H                                                      | -2.40681000                 | -2.11638400 | -2.12488100 |
| H                                                      | -0.63579800                 | 0.57508500  | 2.27847500  |
| O                                                      | -4.96636200                 | -1.60561700 | -1.35560500 |
| H                                                      | -4.81056500                 | -2.18836200 | -2.10805300 |
| C                                                      | 1.77268900                  | -0.21971100 | 0.40564000  |
| C                                                      | 1.92066200                  | 0.85604800  | -0.47528900 |
| O                                                      | -5.20617100                 | -0.01418500 | 0.76676700  |

|                                                        |                             |             |             |
|--------------------------------------------------------|-----------------------------|-------------|-------------|
| H                                                      | -5.87176400                 | -0.45172900 | 0.21606300  |
| H                                                      | 0.08937700                  | 1.51418300  | -1.37095500 |
| O                                                      | 1.33414800                  | 3.10936100  | -0.93958900 |
| H                                                      | 0.62742900                  | 3.76253600  | -0.86215700 |
| Frequency and Energy at B3LYP/6-311G(d,p) in gas phase |                             |             |             |
| Zero-point correction=                                 | 0.275585 (Hartree/Particle) |             |             |
| Thermal correction to Energy=                          | 0.294851                    |             |             |
| Thermal correction to Enthalpy=                        | 0.295795                    |             |             |
| Thermal correction to Gibbs Free Energy=               | 0.227724                    |             |             |
| Sum of electronic and zero-point Energies=             | -1106.322779                |             |             |
| Sum of electronic and thermal Energies=                | -1106.303513                |             |             |
| Sum of electronic and thermal Enthalpies=              | -1106.302569                |             |             |
| Sum of electronic and thermal Free Energies=           | -1106.370639                |             |             |

| Name of compound (10)                                  | Isoteracacidin              |             |             |
|--------------------------------------------------------|-----------------------------|-------------|-------------|
| Cartesian Coordinates optimized at B3LYP/6-311G(d,p)   |                             |             |             |
| C                                                      | 2.66019300                  | 0.91745200  | -1.38057100 |
| C                                                      | 3.69996000                  | -0.00135600 | -1.29199300 |
| C                                                      | 3.64445800                  | -0.99990500 | -0.32440800 |
| C                                                      | 2.56740300                  | -1.08995700 | 0.55990200  |
| H                                                      | 2.69108400                  | 1.71438200  | -2.11137300 |
| H                                                      | 4.55014000                  | 0.05788800  | -1.96411200 |
| C                                                      | 0.42439200                  | 1.82268200  | -0.59933100 |
| C                                                      | -0.62049800                 | 0.56463600  | 1.34114300  |
| C                                                      | -0.23859400                 | 1.94891200  | 0.76858900  |
| O                                                      | 0.52212800                  | -0.30313200 | 1.38117200  |
| O                                                      | 2.51563500                  | -2.06335700 | 1.51160100  |
| H                                                      | 3.32675500                  | -2.58114300 | 1.43002600  |
| O                                                      | 4.61272000                  | -1.96487800 | -0.14602600 |
| H                                                      | 5.33957000                  | -1.81137600 | -0.75651700 |
| O                                                      | -1.34580600                 | 2.84288900  | 0.71539600  |
| H                                                      | -2.04374600                 | 2.41753000  | 0.20017300  |
| H                                                      | 0.47939900                  | 2.41767900  | 1.44602800  |
| C                                                      | -1.79552000                 | -0.09357500 | 0.63568500  |
| C                                                      | -1.62260600                 | -1.07695300 | -0.34089200 |
| C                                                      | -3.10451600                 | 0.27832700  | 0.97382900  |
| C                                                      | -2.71755100                 | -1.65161600 | -0.97909900 |
| H                                                      | -0.62636400                 | -1.41481700 | -0.59600200 |
| C                                                      | -4.20517800                 | -0.28385900 | 0.33799300  |
| H                                                      | -3.26764700                 | 1.00818600  | 1.76005400  |
| C                                                      | -4.01415000                 | -1.25299200 | -0.64803000 |
| H                                                      | -2.56190900                 | -2.41941600 | -1.73163300 |
| H                                                      | -5.21553000                 | 0.00088100  | 0.60504100  |
| H                                                      | -0.89153300                 | 0.70977800  | 2.38927800  |
| O                                                      | -5.12522300                 | -1.77920000 | -1.23992700 |
| H                                                      | -4.85913500                 | -2.44559700 | -1.88191400 |
| C                                                      | 1.52755700                  | -0.15548800 | 0.46322800  |
| C                                                      | 1.56844000                  | 0.84565200  | -0.51590700 |
| H                                                      | -0.33051800                 | 1.44582700  | -1.31057400 |
| O                                                      | 0.89543100                  | 3.08800900  | -1.04431500 |
| H                                                      | 0.16762700                  | 3.70579600  | -0.90251400 |
| Frequency and Energy at B3LYP/6-311G(d,p) in gas phase |                             |             |             |
| Zero-point correction=                                 | 0.271187 (Hartree/Particle) |             |             |
| Thermal correction to Energy=                          | 0.289469                    |             |             |

|                                                        |                                     |
|--------------------------------------------------------|-------------------------------------|
| Thermal correction to Enthalpy=                        | 0.290413                            |
| Thermal correction to Gibbs Free Energy=               | 0.224975                            |
| Sum of electronic and zero-point Energies=             | -1031.342477                        |
| Sum of electronic and thermal Energies=                | -1031.324195                        |
| Sum of electronic and thermal Enthalpies=              | -1031.323251                        |
| Sum of electronic and thermal Free Energies=           | -1031.388689                        |
| <b>Name of radical</b>                                 | O7-H                                |
| Cartesian Coordinates optimized at B3LYP/6-311G(d,p)   |                                     |
| C                                                      | 2.74737700 0.87716300 -1.36582700   |
| C                                                      | 3.77641500 -0.01812400 -1.31282200  |
| C                                                      | 3.74514800 -1.08094700 -0.34239600  |
| C                                                      | 2.59010200 -1.13946700 0.55586800   |
| H                                                      | 2.75844900 1.69507000 -2.07459500   |
| H                                                      | 4.63135100 0.04022800 -1.97416200   |
| C                                                      | 0.49401700 1.78150900 -0.58654300   |
| C                                                      | -0.59475100 0.53961200 1.34439800   |
| C                                                      | -0.18319300 1.91749400 0.77650900   |
| O                                                      | 0.53182400 -0.35536400 1.37700500   |
| O                                                      | 2.58960300 -2.12603400 1.44688500   |
| H                                                      | 3.43001700 -2.60140300 1.26472400   |
| O                                                      | 4.62001000 -1.96482400 -0.19074200  |
| O                                                      | -1.27225600 2.82876200 0.70800900   |
| H                                                      | -1.98462900 2.40541800 0.21067600   |
| H                                                      | 0.53532400 2.37581700 1.46053200    |
| C                                                      | -1.78300700 -0.09028900 0.63780000  |
| C                                                      | -1.63313900 -1.05511800 -0.36106100 |
| C                                                      | -3.08327900 0.29402200 0.99578500   |
| C                                                      | -2.74165900 -1.60112100 -1.00049500 |
| H                                                      | -0.64513800 -1.40468100 -0.63251900 |
| C                                                      | -4.19720800 -0.23878500 0.35859900  |
| H                                                      | -3.22888300 1.00944300 1.79858700   |
| C                                                      | -4.02945800 -1.19055200 -0.64896800 |
| H                                                      | -2.60388300 -2.35570900 -1.76943300 |
| H                                                      | -5.20080000 0.05481100 0.64072600   |
| H                                                      | -0.85861400 0.68580900 2.39384900   |
| O                                                      | -5.15272400 -1.68711400 -1.23954000 |
| H                                                      | -4.90579300 -2.34597500 -1.89695900 |
| C                                                      | 1.54944300 -0.20431300 0.47707800   |
| C                                                      | 1.62529400 0.79523700 -0.48877400   |
| H                                                      | -0.25338300 1.39823900 -1.30345800  |
| O                                                      | 0.98002600 3.03689700 -1.03379700   |
| H                                                      | 0.26149900 3.66641900 -0.89542800   |
| Frequency and Energy at B3LYP/6-311G(d,p) in gas phase |                                     |
| Zero-point correction=                                 | 0.259406 (Hartree/Particle)         |
| Thermal correction to Energy=                          | 0.276942                            |
| Thermal correction to Enthalpy=                        | 0.277887                            |
| Thermal correction to Gibbs Free Energy=               | 0.212975                            |
| Sum of electronic and zero-point Energies=             | -1030.726525                        |
| Sum of electronic and thermal Energies=                | -1030.708989                        |
| Sum of electronic and thermal Enthalpies=              | -1030.708045                        |
| Sum of electronic and thermal Free Energies=           | -1030.772956                        |
| <b>Name of radical</b>                                 | C4-H                                |
| Cartesian Coordinates optimized at B3LYP/6-311G(d,p)   |                                     |
| C                                                      | 2.59027200 0.87504100 -1.41951700   |



|                                                        |                             |             |             |
|--------------------------------------------------------|-----------------------------|-------------|-------------|
| C                                                      | 3.52458000                  | -0.14632000 | -1.36027400 |
| C                                                      | 3.46789700                  | -1.08274300 | -0.32910800 |
| C                                                      | 2.46516400                  | -1.02190500 | 0.65408200  |
| H                                                      | 2.62801700                  | 1.61425000  | -2.20799900 |
| H                                                      | 4.30672000                  | -0.21803900 | -2.11010300 |
| C                                                      | 0.60697100                  | 1.99518900  | -0.41178200 |
| C                                                      | -0.62915500                 | 0.77167300  | 1.39076300  |
| C                                                      | -0.32155100                 | 2.15137900  | 0.74836000  |
| O                                                      | 0.58341200                  | 0.03168100  | 1.59364600  |
| O                                                      | 2.40733500                  | -1.95141200 | 1.64863900  |
| H                                                      | 3.14802000                  | -2.55583400 | 1.51333100  |
| O                                                      | 4.34708500                  | -2.13535600 | -0.18300600 |
| H                                                      | 5.00985900                  | -2.10327100 | -0.87893600 |
| O                                                      | -1.50539500                 | 2.85782400  | 0.35941400  |
| H                                                      | -2.06585300                 | 2.23444300  | -0.12408000 |
| H                                                      | 0.12983400                  | 2.79275900  | 1.51760000  |
| C                                                      | -1.69893100                 | -0.01334800 | 0.65191300  |
| C                                                      | -1.42373600                 | -0.83973700 | -0.44311000 |
| C                                                      | -3.03069600                 | 0.09274000  | 1.07683900  |
| C                                                      | -2.44295300                 | -1.53265400 | -1.08836100 |
| H                                                      | -0.40719400                 | -0.96072100 | -0.79268100 |
| C                                                      | -4.05834400                 | -0.58442200 | 0.43234600  |
| H                                                      | -3.26776500                 | 0.71422400  | 1.93417200  |
| C                                                      | -3.76518500                 | -1.40591200 | -0.65700900 |
| H                                                      | -2.20719600                 | -2.17680400 | -1.93066100 |
| H                                                      | -5.08492400                 | -0.50206800 | 0.76753700  |
| H                                                      | -0.99463500                 | 0.95245100  | 2.40281400  |
| O                                                      | -4.80377900                 | -2.05879400 | -1.25315100 |
| H                                                      | -4.46755700                 | -2.60155800 | -1.97389600 |
| C                                                      | 1.52706600                  | 0.00095500  | 0.60023900  |
| C                                                      | 1.57404400                  | 0.97819300  | -0.43686100 |
| O                                                      | 0.61369800                  | 2.98871300  | -1.34061900 |
| H                                                      | -0.17884700                 | 3.52015000  | -1.16760600 |
| Frequency and Energy at B3LYP/6-311G(d,p) in gas phase |                             |             |             |
| Zero-point correction=                                 | 0.258074 (Hartree/Particle) |             |             |
| Thermal correction to Energy=                          | 0.276429                    |             |             |
| Thermal correction to Enthalpy=                        | 0.277373                    |             |             |
| Thermal correction to Gibbs Free Energy=               | 0.210608                    |             |             |
| Sum of electronic and zero-point Energies=             | -1030.719887                |             |             |
| Sum of electronic and thermal Energies=                | -1030.701532                |             |             |
| Sum of electronic and thermal Enthalpies=              | -1030.700588                |             |             |
| Sum of electronic and thermal Free Energies=           | -1030.767353                |             |             |
| <b>Name of anion</b>                                   | O7-H                        |             |             |
| Cartesian Coordinates optimized at B3LYP/6-311G(d,p)   |                             |             |             |
| C                                                      | 2.50718700                  | 0.66785200  | -1.52804600 |
| C                                                      | 3.45852900                  | -0.34510700 | -1.44487200 |
| C                                                      | 3.47124400                  | -1.25416600 | -0.35157300 |
| C                                                      | 2.44470700                  | -1.05020400 | 0.64782700  |
| H                                                      | 2.52069600                  | 1.35404500  | -2.36936500 |
| H                                                      | 4.21480600                  | -0.46440500 | -2.21499700 |
| C                                                      | 0.47027400                  | 1.90899700  | -0.67254500 |
| C                                                      | -0.59069300                 | 0.81955300  | 1.36419400  |
| C                                                      | -0.22526900                 | 2.14508300  | 0.66232400  |
| O                                                      | 0.58441700                  | 0.06490600  | 1.60125700  |

|                                                        |                             |             |             |
|--------------------------------------------------------|-----------------------------|-------------|-------------|
| O                                                      | 2.48620300                  | -1.95980500 | 1.66767800  |
| H                                                      | 3.26652400                  | -2.48903000 | 1.36269700  |
| O                                                      | 4.27162700                  | -2.23152300 | -0.15819800 |
| O                                                      | -1.35113800                 | 3.02340200  | 0.50566000  |
| H                                                      | -1.95935000                 | 2.58320200  | -0.10088500 |
| H                                                      | 0.46951400                  | 2.68135500  | 1.31222300  |
| C                                                      | -1.68266200                 | 0.01751300  | 0.66117400  |
| C                                                      | -1.39357400                 | -1.14707600 | -0.05583400 |
| C                                                      | -3.02353400                 | 0.41427500  | 0.75838000  |
| C                                                      | -2.40691700                 | -1.86763300 | -0.68197300 |
| H                                                      | -0.37051100                 | -1.49463200 | -0.11762200 |
| C                                                      | -4.04385900                 | -0.29857000 | 0.13379500  |
| H                                                      | -3.27729300                 | 1.28933400  | 1.34806400  |
| C                                                      | -3.73300500                 | -1.44392800 | -0.59628200 |
| H                                                      | -2.16049600                 | -2.76978700 | -1.23655200 |
| H                                                      | -5.07981100                 | 0.00953600  | 0.21606100  |
| H                                                      | -0.96567900                 | 1.07738800  | 2.36002700  |
| O                                                      | -4.76560400                 | -2.12309900 | -1.19829900 |
| H                                                      | -4.39779400                 | -2.88808900 | -1.65198600 |
| C                                                      | 1.51899700                  | -0.03313500 | 0.55684100  |
| C                                                      | 1.53076400                  | 0.85729500  | -0.54544900 |
| H                                                      | -0.31052100                 | 1.59158500  | -1.39378700 |
| O                                                      | 1.01825600                  | 3.15063600  | -1.14984800 |
| H                                                      | 0.28669000                  | 3.77886900  | -1.10763000 |
| Frequency and Energy at B3LYP/6-311G(d,p) in gas phase |                             |             |             |
| Zero-point correction=                                 | 0.258015 (Hartree/Particle) |             |             |
| Thermal correction to Energy=                          | 0.275546                    |             |             |
| Thermal correction to Enthalpy=                        | 0.276490                    |             |             |
| Thermal correction to Gibbs Free Energy=               | 0.212493                    |             |             |
| Sum of electronic and zero-point Energies=             | -1030.803570                |             |             |
| Sum of electronic and thermal Energies=                | -1030.786039                |             |             |
| Sum of electronic and thermal Enthalpies=              | -1030.785095                |             |             |
| Sum of electronic and thermal Free Energies=           | -1030.849092                |             |             |
| <b>Name of cationic radical</b>                        |                             |             |             |
| Cartesian Coordinates optimized at B3LYP/6-311G(d,p)   |                             |             |             |
| C                                                      | 2.80473100                  | 0.99402800  | -1.20234200 |
| C                                                      | 3.86383100                  | 0.05740200  | -1.12404800 |
| C                                                      | 3.74644700                  | -1.03000900 | -0.29508900 |
| C                                                      | 2.56294800                  | -1.19578200 | 0.48652300  |
| H                                                      | 2.90842400                  | 1.85806700  | -1.84631700 |
| H                                                      | 4.75889000                  | 0.20671900  | -1.71648800 |
| C                                                      | 0.50544600                  | 1.86116000  | -0.55635600 |
| C                                                      | -0.64154100                 | 0.50073800  | 1.27256100  |
| C                                                      | -0.21282200                 | 1.90766100  | 0.79522600  |
| O                                                      | 0.47649400                  | -0.44708300 | 1.20618600  |
| O                                                      | 2.42287100                  | -2.21860900 | 1.30302800  |
| H                                                      | 3.21907500                  | -2.77806900 | 1.26481600  |
| O                                                      | 4.64407100                  | -2.02214000 | -0.10008600 |
| H                                                      | 5.44538600                  | -1.90216400 | -0.62425000 |
| O                                                      | -1.30644000                 | 2.79928800  | 0.77080300  |
| H                                                      | -2.01343600                 | 2.41964400  | 0.23213700  |
| H                                                      | 0.48788600                  | 2.32715100  | 1.52229700  |
| C                                                      | -1.84043600                 | -0.10042100 | 0.57921300  |
| C                                                      | -1.73900300                 | -0.83618100 | -0.61060000 |

|                                                        |                             |             |             |
|--------------------------------------------------------|-----------------------------|-------------|-------------|
| C                                                      | -3.11205400                 | 0.08020200  | 1.15023300  |
| C                                                      | -2.86845900                 | -1.35281700 | -1.22687100 |
| H                                                      | -0.77189500                 | -1.02754000 | -1.05957500 |
| C                                                      | -4.24772300                 | -0.41874100 | 0.53821400  |
| H                                                      | -3.20985000                 | 0.62197700  | 2.08439700  |
| C                                                      | -4.13353700                 | -1.14368300 | -0.65847800 |
| H                                                      | -2.77371500                 | -1.92506000 | -2.14378700 |
| H                                                      | -5.23049800                 | -0.27578400 | 0.96911000  |
| H                                                      | -0.85177700                 | 0.55608800  | 2.34132800  |
| O                                                      | -5.27287500                 | -1.61356800 | -1.19861400 |
| H                                                      | -5.09527200                 | -2.10806100 | -2.00767300 |
| C                                                      | 1.50576300                  | -0.22165300 | 0.40410700  |
| C                                                      | 1.63327300                  | 0.86288800  | -0.47255000 |
| H                                                      | -0.21390200                 | 1.53073400  | -1.32376000 |
| O                                                      | 1.04151600                  | 3.11911000  | -0.90030500 |
| H                                                      | 0.33441500                  | 3.77156000  | -0.81877700 |
| Frequency and Energy at B3LYP/6-311G(d,p) in gas phase |                             |             |             |
| Zero-point correction=                                 | 0.271254 (Hartree/Particle) |             |             |
| Thermal correction to Energy=                          | 0.289375                    |             |             |
| Thermal correction to Enthalpy=                        | 0.290319                    |             |             |
| Thermal correction to Gibbs Free Energy=               | 0.224592                    |             |             |
| Sum of electronic and zero-point Energies=             | -1031.079795                |             |             |
| Sum of electronic and thermal Energies=                | -1031.061674                |             |             |
| Sum of electronic and thermal Enthalpies=              | -1031.060730                |             |             |
| Sum of electronic and thermal Free Energies=           | -1031.126457                |             |             |

| Name of compound (11)                                | Melacacidin |             |             |
|------------------------------------------------------|-------------|-------------|-------------|
| Cartesian Coordinates optimized at B3LYP/6-311G(d,p) |             |             |             |
| C                                                    | -2.75773300 | 0.89294600  | 1.56077400  |
| C                                                    | -3.77060800 | -0.05228200 | 1.46667600  |
| C                                                    | -3.80801400 | -0.89605900 | 0.35881000  |
| C                                                    | -2.84237500 | -0.81274400 | -0.64592500 |
| H                                                    | -2.71417500 | 1.55734900  | 2.41589000  |
| H                                                    | -4.53017100 | -0.13242800 | 2.23765800  |
| C                                                    | -0.69028600 | 2.04224300  | 0.66720500  |
| H                                                    | -1.11330900 | 3.00095700  | 0.97731800  |
| C                                                    | 0.31007800  | 0.88100200  | -1.36882500 |
| C                                                    | 0.00414300  | 2.24051100  | -0.68591400 |
| O                                                    | -0.92420000 | 0.16929700  | -1.56391700 |
| O                                                    | 0.28678000  | 1.75169400  | 1.68462100  |
| H                                                    | 0.55471900  | 0.82983100  | 1.57893500  |
| O                                                    | -2.86297100 | -1.65533900 | -1.71536400 |
| H                                                    | -3.63468000 | -2.22690000 | -1.61243800 |
| O                                                    | -4.76002100 | -1.87012900 | 0.15783000  |
| H                                                    | -5.39003500 | -1.86629700 | 0.88438700  |
| O                                                    | 1.15524600  | 3.04468400  | -0.54411000 |
| H                                                    | 1.50618500  | 2.84133000  | 0.33560700  |
| H                                                    | -0.68403500 | 2.76814100  | -1.35442300 |
| C                                                    | 1.36529500  | 0.01071400  | -0.69381600 |
| C                                                    | 1.05838100  | -1.24004000 | -0.15597400 |
| C                                                    | 2.69765000  | 0.45188200  | -0.66999800 |
| C                                                    | 2.05887300  | -2.02220900 | 0.42889300  |
| H                                                    | 0.05173500  | -1.62852900 | -0.21477600 |
| C                                                    | 3.69299100  | -0.32177700 | -0.09111600 |

|                                                        |                             |             |             |
|--------------------------------------------------------|-----------------------------|-------------|-------------|
| H                                                      | 2.97348400                  | 1.40422400  | -1.10309600 |
| C                                                      | 3.36686200                  | -1.56800000 | 0.46831700  |
| H                                                      | 1.81297900                  | -2.99602900 | 0.84236200  |
| H                                                      | 0.65166100                  | 1.09803100  | -2.38282600 |
| O                                                      | 4.42507600                  | -2.25655300 | 1.01654500  |
| H                                                      | 4.13061800                  | -3.11622800 | 1.33195900  |
| C                                                      | -1.82431300                 | 0.14565500  | -0.53762100 |
| C                                                      | -1.78108500                 | 1.00608700  | 0.56783000  |
| O                                                      | 4.97837800                  | 0.12509200  | -0.07387700 |
| H                                                      | 5.51957300                  | -0.55098800 | 0.35372800  |
| Frequency and Energy at B3LYP/6-311G(d,p) in gas phase |                             |             |             |
| Zero-point correction=                                 | 0.275927 (Hartree/Particle) |             |             |
| Thermal correction to Energy=                          | 0.295276                    |             |             |
| Thermal correction to Enthalpy=                        | 0.296220                    |             |             |
| Thermal correction to Gibbs Free Energy=               | 0.228997                    |             |             |
| Sum of electronic and zero-point Energies=             | -1106.585525                |             |             |
| Sum of electronic and thermal Energies=                | -1106.566176                |             |             |
| Sum of electronic and thermal Enthalpies=              | -1106.565232                |             |             |
| Sum of electronic and thermal Free Energies=           | -1106.632456                |             |             |
| <b>Name of radical</b>                                 |                             | O7-H        |             |
| Cartesian Coordinates optimized at B3LYP/6-311G(d,p)   |                             |             |             |
| C                                                      | -2.79230200                 | 0.80211500  | 1.59093900  |
| C                                                      | -3.79914100                 | -0.11507700 | 1.52573100  |
| C                                                      | -3.89039900                 | -0.98442300 | 0.38051300  |
| C                                                      | -2.87028200                 | -0.83631800 | -0.65989900 |
| H                                                      | -2.70730800                 | 1.46113100  | 2.44808500  |
| H                                                      | -4.54419200                 | -0.21945800 | 2.30388900  |
| C                                                      | -0.74331300                 | 1.99730000  | 0.67556000  |
| H                                                      | -1.18967300                 | 2.94239000  | 0.99646600  |
| C                                                      | 0.28126500                  | 0.88319400  | -1.37557300 |
| C                                                      | -0.04590600                 | 2.22739000  | -0.67168200 |
| O                                                      | -0.94864100                 | 0.16069900  | -1.58558300 |
| O                                                      | 0.22013000                  | 1.70253100  | 1.70076900  |
| H                                                      | 0.53425400                  | 0.79919200  | 1.56172200  |
| O                                                      | -2.96045200                 | -1.66754600 | -1.69162400 |
| H                                                      | -3.75729600                 | -2.20567300 | -1.48817300 |
| O                                                      | -4.75724500                 | -1.86821900 | 0.19561300  |
| O                                                      | 1.09048100                  | 3.04672300  | -0.51416300 |
| H                                                      | 1.45087000                  | 2.83714300  | 0.35973300  |
| H                                                      | -0.74006200                 | 2.75622100  | -1.33306900 |
| C                                                      | 1.34145100                  | 0.01701600  | -0.70445400 |
| C                                                      | 1.04738200                  | -1.23747800 | -0.16818000 |
| C                                                      | 2.66891200                  | 0.47313500  | -0.67760900 |
| C                                                      | 2.05551800                  | -2.01027700 | 0.41641300  |
| H                                                      | 0.04634200                  | -1.63981200 | -0.22839900 |
| C                                                      | 3.67185400                  | -0.29079500 | -0.09879300 |
| H                                                      | 2.93618500                  | 1.42826800  | -1.11004700 |
| C                                                      | 3.35839100                  | -1.54213000 | 0.45828800  |
| H                                                      | 1.81910300                  | -2.98726600 | 0.82735500  |
| H                                                      | 0.62261500                  | 1.11877300  | -2.38499000 |
| O                                                      | 4.42293800                  | -2.21812400 | 1.00540800  |
| H                                                      | 4.14139200                  | -3.08267200 | 1.31977800  |
| C                                                      | -1.84491300                 | 0.11857800  | -0.56002200 |
| C                                                      | -1.81447500                 | 0.94479700  | 0.55785900  |

|                                                        |                             |             |             |
|--------------------------------------------------------|-----------------------------|-------------|-------------|
| O                                                      | 4.95059200                  | 0.17015200  | -0.07950100 |
| H                                                      | 5.50109400                  | -0.50011400 | 0.34574800  |
| Frequency and Energy at B3LYP/6-311G(d,p) in gas phase |                             |             |             |
| Zero-point correction=                                 | 0.264206 (Hartree/Particle) |             |             |
| Thermal correction to Energy=                          | 0.282807                    |             |             |
| Thermal correction to Enthalpy=                        | 0.283751                    |             |             |
| Thermal correction to Gibbs Free Energy=               | 0.217121                    |             |             |
| Sum of electronic and zero-point Energies=             | -1105.968466                |             |             |
| Sum of electronic and thermal Energies=                | -1105.949865                |             |             |
| Sum of electronic and thermal Enthalpies=              | -1105.948921                |             |             |
| Sum of electronic and thermal Free Energies=           | -1106.015551                |             |             |
| <b>Name of radical</b>                                 | O4'-H                       |             |             |
| Cartesian Coordinates optimized at B3LYP/6-311G(d,p)   |                             |             |             |
| C                                                      | -2.72697600                 | 0.94508200  | 1.52851400  |
| C                                                      | -3.74607100                 | 0.00603200  | 1.44430100  |
| C                                                      | -3.78184500                 | -0.86093400 | 0.35430900  |
| C                                                      | -2.80682300                 | -0.80600600 | -0.64423800 |
| H                                                      | -2.68665900                 | 1.62721000  | 2.36959300  |
| H                                                      | -4.51260000                 | -0.05146800 | 2.21013400  |
| C                                                      | -0.64228400                 | 2.05677100  | 0.63057900  |
| H                                                      | -1.05843900                 | 3.02832000  | 0.90880100  |
| C                                                      | 0.36588000                  | 0.83821900  | -1.37121000 |
| C                                                      | 0.07693300                  | 2.21897300  | -0.71410200 |
| O                                                      | -0.87048600                 | 0.13815900  | -1.56456300 |
| O                                                      | 0.31944600                  | 1.78015100  | 1.66690600  |
| H                                                      | 0.49433200                  | 0.83127300  | 1.66969800  |
| O                                                      | -2.82188800                 | -1.66963300 | -1.69473500 |
| H                                                      | -3.59337300                 | -2.24078000 | -1.58608200 |
| O                                                      | -4.73783600                 | -1.83010100 | 0.16417800  |
| H                                                      | -5.36324900                 | -1.82504100 | 0.89491600  |
| O                                                      | 1.23944000                  | 3.00098000  | -0.56971900 |
| H                                                      | 1.57436100                  | 2.80858600  | 0.31895400  |
| H                                                      | -0.59049000                 | 2.74345300  | -1.40518400 |
| C                                                      | 1.41096900                  | -0.02442800 | -0.68268100 |
| C                                                      | 1.06461600                  | -1.27693700 | -0.09621900 |
| C                                                      | 2.74503200                  | 0.40113500  | -0.68910600 |
| C                                                      | 2.00562900                  | -2.06617300 | 0.51373000  |
| H                                                      | 0.04097800                  | -1.61856200 | -0.16127100 |
| C                                                      | 3.71150300                  | -0.38135100 | -0.08093000 |
| H                                                      | 3.02681900                  | 1.33561200  | -1.15572900 |
| C                                                      | 3.38350300                  | -1.65846400 | 0.56255400  |
| H                                                      | 1.74947600                  | -3.02128300 | 0.95616500  |
| H                                                      | 0.72192400                  | 1.03680400  | -2.38476600 |
| O                                                      | 4.31899400                  | -2.30099000 | 1.09107500  |
| C                                                      | -1.78316100                 | 0.14649800  | -0.54574100 |
| C                                                      | -1.74067200                 | 1.02979800  | 0.54159000  |
| O                                                      | 4.99564500                  | -0.03095800 | -0.04124300 |
| H                                                      | 5.43299100                  | -0.76426800 | 0.44147200  |
| Frequency and Energy at B3LYP/6-311G(d,p) in gas phase |                             |             |             |
| Zero-point correction=                                 | 0.264032 (Hartree/Particle) |             |             |
| Thermal correction to Energy=                          | 0.282688                    |             |             |
| Thermal correction to Enthalpy=                        | 0.283633                    |             |             |
| Thermal correction to Gibbs Free Energy=               | 0.216856                    |             |             |
| Sum of electronic and zero-point Energies=             | -1105.968998                |             |             |

|                                                        |                                     |
|--------------------------------------------------------|-------------------------------------|
| Sum of electronic and thermal Energies=                | -1105.950342                        |
| Sum of electronic and thermal Enthalpies=              | -1105.949398                        |
| Sum of electronic and thermal Free Energies=           | -1106.016174                        |
| <b>Name of radical</b>                                 | C2-H                                |
| Cartesian Coordinates optimized at B3LYP/6-311G(d,p)   |                                     |
| C                                                      | -3.77881100 1.29574600 0.11334000   |
| C                                                      | -4.67719100 0.23548700 0.09622700   |
| C                                                      | -4.19455900 -1.06616100 -0.02794500 |
| C                                                      | -2.82588100 -1.32298200 -0.13641000 |
| H                                                      | -4.14235800 2.31184800 0.21198600   |
| H                                                      | -5.74496100 0.41204900 0.17494600   |
| C                                                      | -1.40014200 2.18470000 0.04229300   |
| H                                                      | -1.79808900 3.08454200 -0.43068100  |
| C                                                      | 0.36427400 0.42318700 -0.24920100   |
| C                                                      | -0.09920900 1.79502700 -0.69235200  |
| O                                                      | -0.61510900 -0.55469700 -0.21522700 |
| O                                                      | -1.06764100 2.60479100 1.38102100   |
| H                                                      | -0.94804600 1.81026600 1.91515600   |
| O                                                      | -2.34897000 -2.59054300 -0.25467700 |
| H                                                      | -3.10986200 -3.18565200 -0.24914900 |
| O                                                      | -4.98820300 -2.18917400 -0.05625100 |
| H                                                      | -5.91378000 -1.94029000 0.02323600  |
| O                                                      | 0.85078600 2.82292000 -0.49831700   |
| H                                                      | 0.75616800 3.08353900 0.43024400    |
| H                                                      | -0.31113900 1.76844700 -1.77177700  |
| C                                                      | 1.68521900 -0.09334000 -0.10482900  |
| C                                                      | 1.86685700 -1.46301800 0.23314700   |
| C                                                      | 2.85004400 0.70225700 -0.28973200   |
| C                                                      | 3.13848100 -1.99361700 0.38298800   |
| H                                                      | 1.00190600 -2.09622900 0.36592000   |
| C                                                      | 4.11095600 0.16053600 -0.13677400   |
| H                                                      | 2.76529700 1.74278800 -0.56189400   |
| C                                                      | 4.26341800 -1.19526900 0.20455400   |
| H                                                      | 3.25965400 -3.04228000 0.64061300   |
| O                                                      | 5.56307900 -1.63049300 0.33383500   |
| H                                                      | 5.57378600 -2.56864900 0.54599900   |
| C                                                      | -1.93702800 -0.24078100 -0.11907200 |
| C                                                      | -2.40482700 1.07228200 0.00678600   |
| O                                                      | 5.21233700 0.94501300 -0.32175000   |
| H                                                      | 5.99160400 0.39277400 -0.18178200   |
| Frequency and Energy at B3LYP/6-311G(d,p) in gas phase |                                     |
| ero-point correction=                                  | 0.261903 (Hartree/Particle)         |
| Thermal correction to Energy=                          | 0.281672                            |
| Thermal correction to Enthalpy=                        | 0.282617                            |
| Thermal correction to Gibbs Free Energy=               | 0.213455                            |
| Sum of electronic and zero-point Energies=             | -1105.958588                        |
| Sum of electronic and thermal Energies=                | -1105.938819                        |
| Sum of electronic and thermal Enthalpies=              | -1105.937875                        |
| Sum of electronic and thermal Free Energies=           | -1106.007037                        |
| <b>Name of anion</b>                                   | O7-H                                |
| Cartesian Coordinates optimized at B3LYP/6-311G(d,p)   |                                     |
| C                                                      | -2.76301500 0.87059200 1.54374900   |
| C                                                      | -3.70066100 -0.15384100 1.51327100  |
| C                                                      | -3.73452800 -1.08407500 0.43483900  |

|                                                        |                             |             |             |
|--------------------------------------------------------|-----------------------------|-------------|-------------|
| C                                                      | -2.74830700                 | -0.87987500 | -0.60391300 |
| H                                                      | -2.74853800                 | 1.56137500  | 2.38394800  |
| H                                                      | -4.42748500                 | -0.27278400 | 2.31096900  |
| C                                                      | -0.79008600                 | 2.13643700  | 0.60138800  |
| H                                                      | -1.23829200                 | 3.09866900  | 0.87197500  |
| C                                                      | 0.26650100                  | 0.95017400  | -1.40425500 |
| C                                                      | -0.04681400                 | 2.31251800  | -0.72989600 |
| O                                                      | -0.95560300                 | 0.26511700  | -1.64651600 |
| O                                                      | 0.21295100                  | 1.93624300  | 1.65295800  |
| H                                                      | 0.32501900                  | 0.98045600  | 1.72343500  |
| O                                                      | -2.80206900                 | -1.81319500 | -1.60256800 |
| H                                                      | -3.55868600                 | -2.35477600 | -1.26500900 |
| O                                                      | -4.52440500                 | -2.07512500 | 0.29109200  |
| O                                                      | 1.11351100                  | 3.11204200  | -0.54479600 |
| H                                                      | 1.38543700                  | 2.90655100  | 0.36469600  |
| H                                                      | -0.70509000                 | 2.84052100  | -1.42742900 |
| C                                                      | 1.30129600                  | 0.05609000  | -0.71816600 |
| C                                                      | 0.97451600                  | -1.24716900 | -0.33603000 |
| C                                                      | 2.62390400                  | 0.49676600  | -0.55642000 |
| C                                                      | 1.94023700                  | -2.07796500 | 0.23487500  |
| H                                                      | -0.02648600                 | -1.62060700 | -0.50016700 |
| C                                                      | 3.58586400                  | -0.32878300 | 0.00861500  |
| H                                                      | 2.91237200                  | 1.49247600  | -0.86593400 |
| C                                                      | 3.23713600                  | -1.62266000 | 0.41315900  |
| H                                                      | 1.67580000                  | -3.08894900 | 0.53448200  |
| H                                                      | 0.65513200                  | 1.17842400  | -2.40206800 |
| O                                                      | 4.26362600                  | -2.37364400 | 0.96607400  |
| H                                                      | 3.91040000                  | -3.22309300 | 1.24531000  |
| C                                                      | -1.83323000                 | 0.14825500  | -0.56475100 |
| C                                                      | -1.80993300                 | 1.04914400  | 0.53036100  |
| O                                                      | 4.87373900                  | 0.11704500  | 0.16446300  |
| H                                                      | 5.36915000                  | -0.59977800 | 0.57917100  |
| Frequency and Energy at B3LYP/6-311G(d,p) in gas phase |                             |             |             |
| Zero-point correction=                                 | 0.262953 (Hartree/Particle) |             |             |
| Thermal correction to Energy=                          | 0.281569                    |             |             |
| Thermal correction to Enthalpy=                        | 0.282514                    |             |             |
| Thermal correction to Gibbs Free Energy=               | 0.216417                    |             |             |
| Sum of electronic and zero-point Energies=             | -1106.054203                |             |             |
| Sum of electronic and thermal Energies=                | -1106.035587                |             |             |
| Sum of electronic and thermal Enthalpies=              | -1106.034643                |             |             |
| Sum of electronic and thermal Free Energies=           | -1106.100739                |             |             |
| <b>Name of cationic radical</b>                        |                             |             |             |
| Cartesian Coordinates optimized at B3LYP/6-311G(d,p)   |                             |             |             |
| C                                                      | -2.89930300                 | 0.98617300  | 1.42526100  |
| C                                                      | -3.93247300                 | 0.03633400  | 1.33191800  |
| C                                                      | -3.91568600                 | -0.89242900 | 0.31052100  |
| C                                                      | -2.85720600                 | -0.89023000 | -0.62688700 |
| H                                                      | -2.92877200                 | 1.71385700  | 2.22776500  |
| H                                                      | -4.74130500                 | 0.04289600  | 2.05347800  |
| C                                                      | -0.74849700                 | 2.06276400  | 0.62246700  |
| H                                                      | -1.18291100                 | 3.03624100  | 0.85900600  |
| C                                                      | 0.33035900                  | 0.80095500  | -1.32357000 |
| C                                                      | -0.00843400                 | 2.18978100  | -0.71587800 |
| O                                                      | -0.86527800                 | -0.00872300 | -1.45167500 |

|   |             |             |             |
|---|-------------|-------------|-------------|
| O | 0.17689400  | 1.82203200  | 1.68918400  |
| H | 0.41304900  | 0.88698100  | 1.69965700  |
| O | -2.80366200 | -1.77806900 | -1.61418200 |
| H | -3.58780300 | -2.35004300 | -1.56812600 |
| O | -4.83474800 | -1.86418800 | 0.08155100  |
| H | -5.56573800 | -1.82650200 | 0.70915500  |
| O | 1.14718100  | 2.97483200  | -0.58975800 |
| H | 1.45978400  | 2.86813900  | 0.32096200  |
| H | -0.67240200 | 2.68575700  | -1.43154000 |
| C | 1.41846100  | -0.00377400 | -0.63734400 |
| C | 1.13692800  | -1.20517600 | 0.05261400  |
| C | 2.74047300  | 0.41841700  | -0.76549500 |
| C | 2.15480500  | -1.93628400 | 0.65534800  |
| H | 0.12860400  | -1.59132900 | 0.08793400  |
| C | 3.76828500  | -0.30425200 | -0.16733000 |
| H | 2.99224200  | 1.32125400  | -1.30545300 |
| C | 3.46950600  | -1.49791500 | 0.55461200  |
| H | 1.92970400  | -2.85820900 | 1.18023100  |
| H | 0.63892900  | 0.96021300  | -2.35837300 |
| O | 4.54830800  | -2.11200600 | 1.08158400  |
| H | 4.31500400  | -2.92329300 | 1.54935000  |
| C | -1.81313300 | 0.07889300  | -0.51309800 |
| C | -1.84319000 | 1.02755700  | 0.52426200  |
| O | 5.02786900  | 0.12649400  | -0.27055500 |
| H | 5.62373500  | -0.47382200 | 0.20235600  |

Frequency and Energy at B3LYP/6-311G(d,p) in gas phase

|                                              |                             |
|----------------------------------------------|-----------------------------|
| Zero-point correction=                       | 0.275931 (Hartree/Particle) |
| Thermal correction to Energy=                | 0.295028                    |
| Thermal correction to Enthalpy=              | 0.295973                    |
| Thermal correction to Gibbs Free Energy=     | 0.228439                    |
| Sum of electronic and zero-point Energies=   | -1106.321351                |
| Sum of electronic and thermal Energies=      | -1106.302253                |
| Sum of electronic and thermal Enthalpies=    | -1106.301309                |
| Sum of electronic and thermal Free Energies= | -1106.368843                |

| Name of compound (12)                                | Taxifolin   |             |             |
|------------------------------------------------------|-------------|-------------|-------------|
| Cartesian Coordinates optimized at B3LYP/6-311G(d,p) |             |             |             |
| C                                                    | -2.85814400 | 0.13780700  | 1.20254000  |
| C                                                    | -3.70750100 | -0.91816200 | 0.89260500  |
| C                                                    | -3.51221400 | -1.62110900 | -0.29900800 |
| C                                                    | -2.47451900 | -1.30864400 | -1.18375100 |
| H                                                    | -4.51178500 | -1.16593100 | 1.57567900  |
| C                                                    | -0.97478400 | 1.63746000  | 0.58049200  |
| C                                                    | 0.45895600  | 0.85872100  | -1.36361900 |
| C                                                    | -0.01322200 | 2.05091000  | -0.52925700 |
| O                                                    | -0.63076500 | 0.00121700  | -1.75061500 |
| O                                                    | -1.08103100 | 2.35357300  | 1.58720000  |
| O                                                    | -4.31529000 | -2.65468500 | -0.65277900 |
| H                                                    | -4.98910000 | -2.78292500 | 0.02380200  |
| C                                                    | 1.58087900  | 0.07331200  | -0.69502600 |
| C                                                    | 1.43220100  | -1.25229200 | -0.29794100 |
| C                                                    | 2.81763400  | 0.70631600  | -0.50983000 |
| C                                                    | 2.49768900  | -1.93200000 | 0.29806300  |
| H                                                    | 0.49735400  | -1.77165700 | -0.45314500 |



|                                                        |             |                             |             |
|--------------------------------------------------------|-------------|-----------------------------|-------------|
| C                                                      | 3.87960400  | 0.03733200                  | 0.07975900  |
| H                                                      | 2.98344000  | 1.72931500                  | -0.82941800 |
| C                                                      | 3.71239100  | -1.29520500                 | 0.49075300  |
| H                                                      | 2.37512600  | -2.96512900                 | 0.60941400  |
| H                                                      | 0.81857200  | 1.26189500                  | -2.31298900 |
| O                                                      | 4.82320000  | -1.87002800                 | 1.06309900  |
| H                                                      | 4.63346900  | -2.77939600                 | 1.31290800  |
| C                                                      | -1.62262200 | -0.26218500                 | -0.86966700 |
| C                                                      | -1.79430000 | 0.48851800                  | 0.32094200  |
| H                                                      | 0.85191700  | 2.53683000                  | -0.06795200 |
| O                                                      | -0.70125000 | 2.94384700                  | -1.40502700 |
| H                                                      | -1.00708900 | 3.68994500                  | -0.87687100 |
| O                                                      | 5.07280800  | 0.66819200                  | 0.24985100  |
| H                                                      | 5.67950600  | 0.04328700                  | 0.66750000  |
| H                                                      | -2.33987800 | -1.87520400                 | -2.09426300 |
| O                                                      | -3.06033700 | 0.82428600                  | 2.33114500  |
| H                                                      | -2.38250400 | 1.54308200                  | 2.36002500  |
| Frequency and Energy at B3LYP/6-311G(d,p) in gas phase |             |                             |             |
| Zero-point correction=                                 |             | 0.252822 (Hartree/Particle) |             |
| Thermal correction to Energy=                          |             | 0.271372                    |             |
| Thermal correction to Enthalpy=                        |             | 0.272316                    |             |
| Thermal correction to Gibbs Free Energy=               |             | 0.205506                    |             |
| Sum of electronic and zero-point Energies=             |             | -1105.422487                |             |
| Sum of electronic and thermal Energies=                |             | -1105.403937                |             |
| Sum of electronic and thermal Enthalpies=              |             | -1105.402993                |             |
| Sum of electronic and thermal Free Energies=           |             | -1105.469803                |             |
| <b>Name of radical</b>                                 |             | O4'-H                       |             |
| Cartesian Coordinates optimized at B3LYP/6-311G(d,p)   |             |                             |             |
| C                                                      | -2.84434300 | 0.17399000                  | 1.17869900  |
| C                                                      | -3.69643900 | -0.88071000                 | 0.87210200  |
| C                                                      | -3.48780600 | -1.60606400                 | -0.30330300 |
| C                                                      | -2.43224600 | -1.31610900                 | -1.17670900 |
| H                                                      | -4.51357500 | -1.11015300                 | 1.54610200  |
| C                                                      | -0.93956500 | 1.64894900                  | 0.56233900  |
| C                                                      | 0.51702800  | 0.82298000                  | -1.34724700 |
| C                                                      | 0.04813000  | 2.03510300                  | -0.53521500 |
| O                                                      | -0.56730300 | -0.03252700                 | -1.73565000 |
| O                                                      | -1.05631400 | 2.38518800                  | 1.55221600  |
| O                                                      | -4.29049000 | -2.63822800                 | -0.65412600 |
| H                                                      | -4.97532000 | -2.75675100                 | 0.01335700  |
| C                                                      | 1.63357400  | 0.04697800                  | -0.66373900 |
| C                                                      | 1.44838300  | -1.28858400                 | -0.21283400 |
| C                                                      | 2.87563100  | 0.67382400                  | -0.51976900 |
| C                                                      | 2.46280200  | -1.98259400                 | 0.39408200  |
| H                                                      | 0.48893600  | -1.76496900                 | -0.35904100 |
| C                                                      | 3.91632700  | -0.00640700                 | 0.08801000  |
| H                                                      | 3.04642100  | 1.68159100                  | -0.88183600 |
| C                                                      | 3.75420200  | -1.37906200                 | 0.58174800  |
| H                                                      | 2.32974900  | -2.99920200                 | 0.74334300  |
| H                                                      | 0.89545900  | 1.21271300                  | -2.29574300 |
| O                                                      | 4.74562800  | -1.92239700                 | 1.11767600  |
| C                                                      | -1.57984700 | -0.27174300                 | -0.86557700 |
| C                                                      | -1.76206800 | 0.50116300                  | 0.30912200  |
| H                                                      | 0.91144700  | 2.51508100                  | -0.06383200 |

|                                                        |                             |             |             |
|--------------------------------------------------------|-----------------------------|-------------|-------------|
| O                                                      | -0.60670800                 | 2.92069100  | -1.43994900 |
| H                                                      | -0.91994700                 | 3.67791100  | -0.93199400 |
| O                                                      | 5.12196200                  | 0.53033900  | 0.25749300  |
| H                                                      | 5.64149300                  | -0.17163400 | 0.70423400  |
| H                                                      | -2.28721800                 | -1.89960500 | -2.07482300 |
| O                                                      | -3.06160600                 | 0.88054400  | 2.29073800  |
| H                                                      | -2.38137900                 | 1.59585700  | 2.32279900  |
| Frequency and Energy at B3LYP/6-311G(d,p) in gas phase |                             |             |             |
| Zero-point correction=                                 | 0.240889 (Hartree/Particle) |             |             |
| Thermal correction to Energy=                          | 0.258767                    |             |             |
| Thermal correction to Enthalpy=                        | 0.259711                    |             |             |
| Thermal correction to Gibbs Free Energy=               | 0.193188                    |             |             |
| Sum of electronic and zero-point Energies=             | -1104.804775                |             |             |
| Sum of electronic and thermal Energies=                | -1104.786898                |             |             |
| Sum of electronic and thermal Enthalpies=              | -1104.785954                |             |             |
| Sum of electronic and thermal Free Energies=           | -1104.852477                |             |             |
| <b>Name of radical</b>                                 | C3-H                        |             |             |
| Cartesian Coordinates optimized at B3LYP/6-311G(d,p)   |                             |             |             |
| C                                                      | -3.28425500                 | 0.47043300  | 0.80388900  |
| C                                                      | -4.07375300                 | -0.66990300 | 0.68013000  |
| C                                                      | -3.66501900                 | -1.69146800 | -0.17896300 |
| C                                                      | -2.47704400                 | -1.60795800 | -0.91580500 |
| H                                                      | -4.99694700                 | -0.73484800 | 1.24438300  |
| C                                                      | -1.25592500                 | 1.76609200  | 0.16215900  |
| C                                                      | 0.46676100                  | 0.55241500  | -1.31606300 |
| C                                                      | -0.04457700                 | 1.75053000  | -0.57984100 |
| O                                                      | -0.56653600                 | -0.41826400 | -1.55009700 |
| O                                                      | -1.54838000                 | 2.79882600  | 0.83373200  |
| O                                                      | -4.39786300                 | -2.82311800 | -0.34338400 |
| H                                                      | -5.18838300                 | -2.77384200 | 0.20483400  |
| C                                                      | 1.66277800                  | -0.07956400 | -0.60154300 |
| C                                                      | 1.52028500                  | -1.22029600 | 0.18348300  |
| C                                                      | 2.91855900                  | 0.52200900  | -0.73352000 |
| C                                                      | 2.63044800                  | -1.75631000 | 0.83886800  |
| H                                                      | 0.55937000                  | -1.70679800 | 0.27929600  |
| C                                                      | 4.02319600                  | -0.00441700 | -0.07940800 |
| H                                                      | 3.05647700                  | 1.41054200  | -1.33798400 |
| C                                                      | 3.87279200                  | -1.15397700 | 0.71321400  |
| H                                                      | 2.52373700                  | -2.64982800 | 1.44678600  |
| H                                                      | 0.79244700                  | 0.86893800  | -2.31334100 |
| O                                                      | 5.02725200                  | -1.60036500 | 1.31278800  |
| H                                                      | 4.84623800                  | -2.38831000 | 1.83403400  |
| C                                                      | -1.69351500                 | -0.47404300 | -0.78413500 |
| C                                                      | -2.07107900                 | 0.57875600  | 0.07768700  |
| O                                                      | 0.71980600                  | 2.84005500  | -0.55814900 |
| H                                                      | 0.24348600                  | 3.46435400  | 0.02841900  |
| O                                                      | 5.24092300                  | 0.58642100  | -0.21472600 |
| H                                                      | 5.87588200                  | 0.07602000  | 0.30419800  |
| H                                                      | -2.18623800                 | -2.40790400 | -1.58196000 |
| O                                                      | -3.68530900                 | 1.46117600  | 1.61167600  |
| H                                                      | -3.02311100                 | 2.19003100  | 1.53570800  |
| Frequency and Energy at B3LYP/6-311G(d,p) in gas phase |                             |             |             |
| Zero-point correction=                                 | 0.240395 (Hartree/Particle) |             |             |
| Thermal correction to Energy=                          | 0.258760                    |             |             |

|                                                        |                                     |
|--------------------------------------------------------|-------------------------------------|
| Thermal correction to Enthalpy=                        | 0.259705                            |
| Thermal correction to Gibbs Free Energy=               | 0.192368                            |
| Sum of electronic and zero-point Energies=             | -1104.809134                        |
| Sum of electronic and thermal Energies=                | -1104.790769                        |
| Sum of electronic and thermal Enthalpies=              | -1104.789824                        |
| Sum of electronic and thermal Free Energies=           | -1104.857161                        |
| <b>Name of anion</b>                                   | O4'-H                               |
| Cartesian Coordinates optimized at B3LYP/6-311G(d,p)   |                                     |
| C                                                      | -2.95724900 -0.07443000 0.97856200  |
| C                                                      | -3.49616700 -1.34190000 0.80552100  |
| C                                                      | -2.96940800 -2.17231900 -0.19240500 |
| C                                                      | -1.92017900 -1.77335500 -1.01342000 |
| H                                                      | -4.31497700 -1.66218600 1.44049700  |
| C                                                      | -1.36606400 1.70041000 0.28771500   |
| C                                                      | 0.52316100 1.00504600 -1.27916000   |
| C                                                      | -0.30693900 2.14685400 -0.71198400  |
| O                                                      | -0.39251500 -0.13686700 -1.66904800 |
| O                                                      | -1.80143400 2.53475600 1.10731500   |
| O                                                      | -3.47414800 -3.42511400 -0.39529000 |
| H                                                      | -4.15517200 -3.58921100 0.26485300  |
| C                                                      | 1.65824400 0.53483500 -0.44084300   |
| C                                                      | 1.71426600 0.68729600 0.95160200    |
| C                                                      | 2.72771000 -0.15065000 -1.08138100  |
| C                                                      | 2.78019800 0.19664600 1.70403600    |
| H                                                      | 0.92065500 1.21270900 1.47562200    |
| C                                                      | 3.77530400 -0.64173700 -0.34657900  |
| H                                                      | 2.71861400 -0.29133500 -2.15918100  |
| C                                                      | 3.86195700 -0.49716600 1.09855200   |
| H                                                      | 2.81072100 0.34243600 2.77950500    |
| H                                                      | 0.87153000 1.30966900 -2.26688300   |
| O                                                      | 4.89106400 -0.98474100 1.66796700   |
| C                                                      | -1.37161200 -0.50103200 -0.84680600 |
| C                                                      | -1.88168800 0.37078900 0.15652200   |
| H                                                      | 0.36064200 2.85302400 -0.21032900   |
| O                                                      | -0.99617000 2.79208100 -1.79698700  |
| H                                                      | -1.52431500 3.49418300 -1.40081300  |
| O                                                      | 4.84403600 -1.29720900 -0.88226700  |
| H                                                      | 5.36055800 -1.47115800 -0.05629000  |
| H                                                      | -1.51836700 -2.44148300 -1.76185700 |
| O                                                      | -3.46983900 0.73239200 1.92068800   |
| H                                                      | -2.96705900 1.58524800 1.85626700   |
| Frequency and Energy at B3LYP/6-311G(d,p) in gas phase |                                     |
| Zero-point correction=                                 | 0.239448 (Hartree/Particle)         |
| Thermal correction to Energy=                          | 0.257330                            |
| Thermal correction to Enthalpy=                        | 0.258274                            |
| Thermal correction to Gibbs Free Energy=               | 0.193046                            |
| Sum of electronic and zero-point Energies=             | -1104.894720                        |
| Sum of electronic and thermal Energies=                | -1104.876838                        |
| Sum of electronic and thermal Enthalpies=              | -1104.875894                        |
| Sum of electronic and thermal Free Energies=           | -1104.941122                        |
| <b>Name of anion</b>                                   | C3-H                                |
| Cartesian Coordinates optimized at B3LYP/6-311G(d,p)   |                                     |
| C                                                      | -3.00451000 0.37293800 0.98127700   |
| C                                                      | -3.69668200 -0.84830300 1.00063100  |

|                                                        |                             |             |             |
|--------------------------------------------------------|-----------------------------|-------------|-------------|
| C                                                      | -3.35624100                 | -1.86144400 | 0.11050000  |
| C                                                      | -2.31184100                 | -1.67622900 | -0.78527900 |
| H                                                      | -4.50586700                 | -0.99500800 | 1.71602400  |
| C                                                      | -1.23883600                 | 1.91090800  | -0.08818100 |
| C                                                      | 0.40710300                  | 0.62281000  | -1.53341400 |
| C                                                      | -0.13048100                 | 1.84372400  | -0.89607400 |
| O                                                      | -0.64142500                 | -0.35718600 | -1.72794700 |
| O                                                      | -1.60465200                 | 3.02270700  | 0.43737000  |
| O                                                      | -4.01838100                 | -3.07678400 | 0.09603800  |
| H                                                      | -4.69484400                 | -3.04571700 | 0.77869800  |
| C                                                      | 1.59954400                  | -0.04153600 | -0.81472300 |
| C                                                      | 1.85218000                  | -1.40826500 | -0.94486900 |
| C                                                      | 2.46154600                  | 0.74297500  | -0.04186600 |
| C                                                      | 2.94548500                  | -1.98994400 | -0.29961900 |
| H                                                      | 1.17984200                  | -2.01943000 | -1.53299200 |
| C                                                      | 3.56115000                  | 0.17194300  | 0.58721100  |
| H                                                      | 2.26658700                  | 1.80281200  | 0.07086500  |
| C                                                      | 3.79760100                  | -1.20172900 | 0.45959000  |
| H                                                      | 3.13364800                  | -3.05824900 | -0.38509400 |
| H                                                      | 0.74712500                  | 0.85425300  | -2.55547900 |
| O                                                      | 4.91598800                  | -1.68637900 | 1.13171900  |
| H                                                      | 4.86501600                  | -2.64580900 | 1.15486600  |
| C                                                      | -1.62950100                 | -0.45896700 | -0.78729500 |
| C                                                      | -1.95411000                 | 0.61271300  | 0.07564200  |
| O                                                      | 0.57591000                  | 3.03274700  | -1.08994000 |
| H                                                      | 0.01258800                  | 3.62697400  | -0.54355200 |
| O                                                      | 4.40981000                  | 0.94411000  | 1.34097100  |
| H                                                      | 5.05693300                  | 0.34376500  | 1.73061800  |
| H                                                      | -2.02743900                 | -2.45799500 | -1.47729100 |
| O                                                      | -3.35770200                 | 1.35096700  | 1.87448800  |
| H                                                      | -4.08439700                 | 1.00337100  | 2.40055400  |
| Frequency and Energy at B3LYP/6-311G(d,p) in gas phase |                             |             |             |
| Zero-point correction=                                 | 0.236355 (Hartree/Particle) |             |             |
| Thermal correction to Energy=                          | 0.255794                    |             |             |
| Thermal correction to Enthalpy=                        | 0.256738                    |             |             |
| Thermal correction to Gibbs Free Energy=               | 0.187954                    |             |             |
| Sum of electronic and zero-point Energies=             | -1104.833513                |             |             |
| Sum of electronic and thermal Energies=                | -1104.814075                |             |             |
| Sum of electronic and thermal Enthalpies=              | -1104.813130                |             |             |
| Sum of electronic and thermal Free Energies=           | -1104.881915                |             |             |
| <b>Name of cationic radical</b>                        |                             |             |             |
| Cartesian Coordinates optimized at B3LYP/6-311G(d,p)   |                             |             |             |
| C                                                      | -3.04889200                 | 0.14844500  | 1.06057300  |
| C                                                      | -3.89631000                 | -0.90590500 | 0.66107300  |
| C                                                      | -3.58956900                 | -1.64813300 | -0.48363800 |
| C                                                      | -2.43253200                 | -1.37394000 | -1.22541000 |
| H                                                      | -4.78249800                 | -1.10540700 | 1.25211600  |
| C                                                      | -1.07545900                 | 1.60505900  | 0.65424800  |
| C                                                      | 0.50803800                  | 0.83771600  | -1.19043700 |
| C                                                      | -0.05286900                 | 2.02473500  | -0.39900200 |
| O                                                      | -0.49530200                 | -0.14286500 | -1.56242900 |
| O                                                      | -1.26022000                 | 2.29309300  | 1.65890800  |
| O                                                      | -4.35326000                 | -2.65831200 | -0.92486100 |
| H                                                      | -5.13325800                 | -2.77842400 | -0.36947500 |

|   |             |             |             |
|---|-------------|-------------|-------------|
| C | 1.67073400  | 0.12421100  | -0.53622700 |
| C | 1.47795500  | -0.97394100 | 0.33558000  |
| C | 2.96044300  | 0.55806000  | -0.81949100 |
| C | 2.55571700  | -1.59279500 | 0.94950400  |
| H | 0.48285900  | -1.35033400 | 0.52782800  |
| C | 4.05572300  | -0.05088000 | -0.21096900 |
| H | 3.15013800  | 1.37697600  | -1.50307500 |
| C | 3.84694300  | -1.14295900 | 0.68734900  |
| H | 2.39989000  | -2.43090000 | 1.61949800  |
| H | 0.83494100  | 1.24090100  | -2.15054800 |
| O | 4.97706200  | -1.65269900 | 1.20624600  |
| H | 4.80864400  | -2.38867900 | 1.80857800  |
| C | -1.59303200 | -0.32320600 | -0.82266400 |
| C | -1.88539000 | 0.46117600  | 0.31447000  |
| H | 0.77317300  | 2.54933800  | 0.09210700  |
| O | -0.72448400 | 2.84569100  | -1.34371600 |
| H | -0.99481800 | 3.66490700  | -0.91154100 |
| O | 5.28632400  | 0.38721000  | -0.47128400 |
| H | 5.93958500  | -0.12693700 | 0.02776800  |
| H | -2.18601900 | -1.96433900 | -2.09716900 |
| O | -3.38068200 | 0.83821000  | 2.13496900  |
| H | -2.69712700 | 1.54440300  | 2.27148500  |

Frequency and Energy at B3LYP/6-311G(d,p) in gas phase

|                                              |                             |
|----------------------------------------------|-----------------------------|
| Zero-point correction=                       | 0.252154 (Hartree/Particle) |
| Thermal correction to Energy=                | 0.270615                    |
| Thermal correction to Enthalpy=              | 0.271559                    |
| Thermal correction to Gibbs Free Energy=     | 0.203921                    |
| Sum of electronic and zero-point Energies=   | -1105.148623                |
| Sum of electronic and thermal Energies=      | -1105.130162                |
| Sum of electronic and thermal Enthalpies=    | -1105.129218                |
| Sum of electronic and thermal Free Energies= | -1105.196855                |

| Name of compound (13)                                | Teracacidin |             |             |
|------------------------------------------------------|-------------|-------------|-------------|
| Cartesian Coordinates optimized at B3LYP/6-311G(d,p) |             |             |             |
| C                                                    | -2.47775100 | 0.87887300  | 1.56833400  |
| C                                                    | -3.48087700 | -0.07685000 | 1.47687800  |
| C                                                    | -3.51762600 | -0.91554000 | 0.36508400  |
| C                                                    | -2.56049000 | -0.81650800 | -0.64633800 |
| H                                                    | -2.43488700 | 1.53910600  | 2.42667900  |
| H                                                    | -4.23357000 | -0.16921800 | 2.25319000  |
| C                                                    | -0.43186400 | 2.05739100  | 0.66481000  |
| H                                                    | -0.86687000 | 3.01174900  | 0.97183000  |
| C                                                    | 0.57294100  | 0.90468200  | -1.37513700 |
| C                                                    | 0.26291100  | 2.26048100  | -0.68784100 |
| O                                                    | -0.66095400 | 0.19286500  | -1.57454300 |
| O                                                    | 0.54775400  | 1.78367800  | 1.68507000  |
| H                                                    | 0.83091400  | 0.86608100  | 1.58305000  |
| O                                                    | -2.57832400 | -1.65503300 | -1.71891400 |
| H                                                    | -3.34121000 | -2.23770300 | -1.61231200 |
| O                                                    | -4.45985800 | -1.89919900 | 0.16648800  |
| H                                                    | -5.08047700 | -1.91097100 | 0.90102800  |
| O                                                    | 1.41387900  | 3.06533900  | -0.53967000 |
| H                                                    | 1.74572900  | 2.87627700  | 0.35083400  |
| H                                                    | -0.42570600 | 2.78938100  | -1.35498300 |

|                                                        |                             |             |             |
|--------------------------------------------------------|-----------------------------|-------------|-------------|
| C                                                      | 1.62676300                  | 0.03218100  | -0.70164600 |
| C                                                      | 1.32956200                  | -1.23459600 | -0.19434300 |
| C                                                      | 2.96136500                  | 0.46641400  | -0.64682400 |
| C                                                      | 2.31833100                  | -2.02553600 | 0.39043100  |
| H                                                      | 0.32471700                  | -1.62683300 | -0.27402500 |
| C                                                      | 3.95166100                  | -0.31419000 | -0.06817300 |
| H                                                      | 3.22225700                  | 1.43044900  | -1.06448500 |
| C                                                      | 3.63249300                  | -1.56661600 | 0.46234800  |
| H                                                      | 2.06316000                  | -3.00859800 | 0.77604200  |
| H                                                      | 4.97991500                  | 0.02429200  | -0.02802500 |
| H                                                      | 0.91390000                  | 1.12693900  | -2.38841000 |
| O                                                      | 4.64458600                  | -2.29277700 | 1.02164100  |
| H                                                      | 4.29698400                  | -3.13600900 | 1.32997600  |
| C                                                      | -1.55267000                 | 0.15293400  | -0.54121800 |
| C                                                      | -1.51000300                 | 1.00789200  | 0.56847300  |
| Frequency and Energy at B3LYP/6-311G(d,p) in gas phase |                             |             |             |
| zero-point correction=                                 | 0.271795 (Hartree/Particle) |             |             |
| Thermal correction to Energy=                          | 0.289820                    |             |             |
| Thermal correction to Enthalpy=                        | 0.290764                    |             |             |
| Thermal correction to Gibbs Free Energy=               | 0.226216                    |             |             |
| Sum of electronic and zero-point Energies=             | -1031.345607                |             |             |
| Sum of electronic and thermal Energies=                | -1031.327581                |             |             |
| Sum of electronic and thermal Enthalpies=              | -1031.326637                |             |             |
| Sum of electronic and thermal Free Energies=           | -1031.391186                |             |             |
| <b>Name of radical</b>                                 |                             | O7-H        |             |
| Cartesian Coordinates optimized at B3LYP/6-311G(d,p)   |                             |             |             |
| C                                                      | -2.51498000                 | 0.78358300  | 1.59797500  |
| C                                                      | -3.51066800                 | -0.14582800 | 1.53576400  |
| C                                                      | -3.59892300                 | -1.01189900 | 0.38774700  |
| C                                                      | -2.58761800                 | -0.84717400 | -0.65874600 |
| H                                                      | -2.43239800                 | 1.44013500  | 2.45721800  |
| H                                                      | -4.24897600                 | -0.26262000 | 2.31856300  |
| C                                                      | -0.49070300                 | 2.01123400  | 0.67235100  |
| H                                                      | -0.95183600                 | 2.95039900  | 0.98987100  |
| C                                                      | 0.54064400                  | 0.90765800  | -1.38216400 |
| C                                                      | 0.20488500                  | 2.24753000  | -0.67510800 |
| O                                                      | -0.68584200                 | 0.17932100  | -1.59426400 |
| O                                                      | 0.47710400                  | 1.73727200  | 1.69979100  |
| H                                                      | 0.80994500                  | 0.84024700  | 1.56447800  |
| O                                                      | -2.67324800                 | -1.67611300 | -1.69257100 |
| H                                                      | -3.46161900                 | -2.22557100 | -1.48626300 |
| O                                                      | -4.45569100                 | -1.90576400 | 0.20525800  |
| O                                                      | 1.33863600                  | 3.07121400  | -0.51292200 |
| H                                                      | 1.67977700                  | 2.87904000  | 0.37285700  |
| H                                                      | -0.49212500                 | 2.77457500  | -1.33500500 |
| C                                                      | 1.60409100                  | 0.04490200  | -0.71279200 |
| C                                                      | 1.32585300                  | -1.22487100 | -0.20194200 |
| C                                                      | 2.93268400                  | 0.49849300  | -0.66055600 |
| C                                                      | 2.32622700                  | -2.00103700 | 0.38255300  |
| H                                                      | 0.32762600                  | -1.63420800 | -0.27810800 |
| C                                                      | 3.93432600                  | -0.26694400 | -0.08204300 |
| H                                                      | 3.18026900                  | 1.46484900  | -1.08107800 |
| C                                                      | 3.63409100                  | -1.52329200 | 0.45147400  |
| H                                                      | 2.08510100                  | -2.98673900 | 0.76979700  |

|                                                        |                             |             |             |
|--------------------------------------------------------|-----------------------------|-------------|-------------|
| H                                                      | 4.95778400                  | 0.08580800  | -0.04476200 |
| H                                                      | 0.87915500                  | 1.14868300  | -2.39144200 |
| O                                                      | 4.65684600                  | -2.23183800 | 1.00940600  |
| H                                                      | 4.32568400                  | -3.08079000 | 1.32055400  |
| C                                                      | -1.57401600                 | 0.12061400  | -0.56231400 |
| C                                                      | -1.54603300                 | 0.94260400  | 0.55875600  |
| Frequency and Energy at B3LYP/6-311G(d,p) in gas phase |                             |             |             |
| Zero-point correction=                                 | 0.260068 (Hartree/Particle) |             |             |
| Thermal correction to Energy=                          | 0.277353                    |             |             |
| Thermal correction to Enthalpy=                        | 0.278297                    |             |             |
| Thermal correction to Gibbs Free Energy=               | 0.214355                    |             |             |
| Sum of electronic and zero-point Energies=             | -1030.728346                |             |             |
| Sum of electronic and thermal Energies=                | -1030.711061                |             |             |
| Sum of electronic and thermal Enthalpies=              | -1030.710117                |             |             |
| Sum of electronic and thermal Free Energies=           | -1030.774059                |             |             |
| <b>Name of radical</b>                                 |                             | C2-H        |             |
| Cartesian Coordinates optimized at B3LYP/6-311G(d,p)   |                             |             |             |
| C                                                      | -3.54948200                 | 1.20047600  | 0.11576700  |
| C                                                      | -4.40226800                 | 0.10321900  | 0.11514000  |
| C                                                      | -3.86600600                 | -1.17807800 | -0.00154500 |
| C                                                      | -2.48861800                 | -1.37791400 | -0.11896700 |
| H                                                      | -3.95473600                 | 2.20118200  | 0.20904900  |
| H                                                      | -5.47591100                 | 0.23525500  | 0.20096700  |
| C                                                      | -1.21168800                 | 2.18833800  | 0.02071400  |
| H                                                      | -1.65080100                 | 3.06711700  | -0.45557500 |
| C                                                      | 0.62411200                  | 0.50098200  | -0.27403600 |
| C                                                      | 0.10112000                  | 1.85047700  | -0.71879700 |
| O                                                      | -0.31303800                 | -0.51749000 | -0.22229900 |
| O                                                      | -0.88908600                 | 2.63170600  | 1.35485900  |
| H                                                      | -0.74334200                 | 1.84645300  | 1.89607300  |
| O                                                      | -1.95937100                 | -2.62512800 | -0.23000300 |
| H                                                      | -2.69423800                 | -3.25189500 | -0.21320400 |
| O                                                      | -4.61168800                 | -2.33362800 | -0.01351800 |
| H                                                      | -5.54638700                 | -2.12335500 | 0.07071300  |
| O                                                      | 1.00981200                  | 2.91702900  | -0.52734600 |
| H                                                      | 0.90111100                  | 3.17611700  | 0.40031200  |
| H                                                      | -0.11317900                 | 1.81588700  | -1.79754800 |
| C                                                      | 1.96609700                  | 0.04081900  | -0.14195200 |
| C                                                      | 2.21610500                  | -1.31484200 | 0.21082100  |
| C                                                      | 3.10424200                  | 0.87022800  | -0.35334300 |
| C                                                      | 3.50542000                  | -1.79679500 | 0.35138700  |
| H                                                      | 1.37844800                  | -1.98063800 | 0.36504300  |
| C                                                      | 4.38754000                  | 0.37891100  | -0.21156000 |
| H                                                      | 2.95625000                  | 1.90109400  | -0.63626000 |
| C                                                      | 4.60448200                  | -0.95665300 | 0.14546600  |
| H                                                      | 3.66296300                  | -2.83775200 | 0.62155700  |
| H                                                      | 5.24611800                  | 1.01826600  | -0.37956700 |
| O                                                      | 5.89728600                  | -1.38010100 | 0.27320000  |
| H                                                      | 5.90068500                  | -2.31240700 | 0.51360600  |
| C                                                      | -1.64608500                 | -0.25907800 | -0.11816200 |
| C                                                      | -2.16802000                 | 1.03417100  | 0.00001400  |
| Frequency and Energy at B3LYP/6-311G(d,p) in gas phase |                             |             |             |
| Zero-point correction=                                 | 0.257916 (Hartree/Particle) |             |             |
| Thermal correction to Energy=                          | 0.276300                    |             |             |

|                                                        |                                     |
|--------------------------------------------------------|-------------------------------------|
| Thermal correction to Enthalpy=                        | 0.277245                            |
| Thermal correction to Gibbs Free Energy=               | 0.211082                            |
| Sum of electronic and zero-point Energies=             | -1030.719241                        |
| Sum of electronic and thermal Energies=                | -1030.700856                        |
| Sum of electronic and thermal Enthalpies=              | -1030.699912                        |
| Sum of electronic and thermal Free Energies=           | -1030.766075                        |
| <b>Name of anion</b>                                   | O7-H                                |
| Cartesian Coordinates optimized at B3LYP/6-311G(d,p)   |                                     |
| C                                                      | -2.50726200 0.85648000 1.53165400   |
| C                                                      | -3.43110000 -0.18008400 1.49299000  |
| C                                                      | -3.44651700 -1.10790400 0.41204200  |
| C                                                      | -2.45765200 -0.88710400 -0.62079600 |
| H                                                      | -2.50628700 1.54423200 2.37443300   |
| H                                                      | -4.16005400 -0.31132600 2.28677100  |
| C                                                      | -0.54606200 2.15098600 0.60460900   |
| H                                                      | -1.00916700 3.10865900 0.86634300   |
| C                                                      | 0.54160200 0.97357700 -1.39098600   |
| C                                                      | 0.21412300 2.33227500 -0.71712100   |
| O                                                      | -0.67694300 0.28771600 -1.65193700  |
| O                                                      | 0.44481400 1.96706800 1.67122100    |
| H                                                      | 0.56922700 1.01312900 1.74670700    |
| O                                                      | -2.49186800 -1.81910300 -1.62150900 |
| H                                                      | -3.24207500 -2.37283900 -1.28921600 |
| O                                                      | -4.22132000 -2.10955600 0.26154800  |
| O                                                      | 1.36965200 3.13565900 -0.51262400   |
| H                                                      | 1.61758600 2.93873000 0.40584400    |
| H                                                      | -0.43681400 2.86002400 -1.42177500  |
| C                                                      | 1.56610300 0.07751900 -0.69282400   |
| C                                                      | 1.24599500 -1.23794800 -0.34538500  |
| C                                                      | 2.88356600 0.50999300 -0.48054600   |
| C                                                      | 2.19531700 -2.07685700 0.23620700   |
| H                                                      | 0.25177400 -1.61499200 -0.54479100  |
| C                                                      | 3.83750100 -0.32161500 0.09639100   |
| H                                                      | 3.15969500 1.51541400 -0.77152500   |
| C                                                      | 3.49130100 -1.62084100 0.46565400   |
| H                                                      | 1.92013600 -3.09399700 0.50484800   |
| H                                                      | 4.85310400 0.01945100 0.26212500    |
| H                                                      | 0.94167400 1.20665400 -2.38334800   |
| O                                                      | 4.46321400 -2.41009300 1.03691400   |
| H                                                      | 4.06967600 -3.26321600 1.24555800   |
| C                                                      | -1.55739200 0.15355300 -0.57443000  |
| C                                                      | -1.55100100 1.05072900 0.52405700   |
| Frequency and Energy at B3LYP/6-311G(d,p) in gas phase |                                     |
| Zero-point correction=                                 | 0.258881 (Hartree/Particle)         |
| Thermal correction to Energy=                          | 0.276095                            |
| Thermal correction to Enthalpy=                        | 0.277039                            |
| Thermal correction to Gibbs Free Energy=               | 0.213939                            |
| Sum of electronic and zero-point Energies=             | -1030.815109                        |
| Sum of electronic and thermal Energies=                | -1030.797895                        |
| Sum of electronic and thermal Enthalpies=              | -1030.796951                        |
| Sum of electronic and thermal Free Energies=           | -1030.860051                        |
| <b>Name of cationic radical</b>                        |                                     |
| Cartesian Coordinates optimized at B3LYP/6-311G(d,p)   |                                     |



|   |             |             |             |
|---|-------------|-------------|-------------|
| C | -2.64084100 | 0.99591600  | 1.42398800  |
| C | -3.69205800 | 0.05849600  | 1.34014200  |
| C | -3.69287600 | -0.87728400 | 0.32903700  |
| C | -2.62970100 | -0.89818200 | -0.60942200 |
| H | -2.66184800 | 1.72935800  | 2.22170900  |
| H | -4.49853200 | 0.08597700  | 2.06372600  |
| C | -0.47443600 | 2.04246400  | 0.61252600  |
| H | -0.89980900 | 3.02005900  | 0.84825900  |
| C | 0.58126100  | 0.76079800  | -1.33382700 |
| C | 0.24629800  | 2.15514500  | -0.73797100 |
| O | -0.61475200 | -0.06473800 | -1.42141000 |
| O | 0.45548300  | 1.80155800  | 1.67072900  |
| H | 0.74796000  | 0.88244800  | 1.63995100  |
| O | -2.59072400 | -1.78668300 | -1.58836500 |
| H | -3.37995400 | -2.35334000 | -1.54064200 |
| O | -4.62284700 | -1.83489000 | 0.10073800  |
| H | -5.35265700 | -1.79470200 | 0.73019100  |
| O | 1.40510100  | 2.93821500  | -0.63968400 |
| H | 1.73945400  | 2.83767100  | 0.26390800  |
| H | -0.42772100 | 2.64694500  | -1.44738900 |
| C | 1.69078300  | -0.02515200 | -0.66867800 |
| C | 1.45605800  | -1.16704800 | 0.11586400  |
| C | 3.02359000  | 0.37663500  | -0.89406400 |
| C | 2.50590700  | -1.85188000 | 0.70914600  |
| H | 0.45132700  | -1.54596700 | 0.24826400  |
| C | 4.07467200  | -0.29145800 | -0.30220200 |
| H | 3.22155000  | 1.23731100  | -1.51977500 |
| C | 3.82504100  | -1.41582200 | 0.50878600  |
| H | 2.31060800  | -2.73377600 | 1.31005600  |
| H | 5.10000600  | 0.02164500  | -0.45316500 |
| H | 0.85739700  | 0.90458500  | -2.38090200 |
| O | 4.89302300  | -2.02568700 | 1.04418800  |
| H | 4.63289500  | -2.79303300 | 1.56921800  |
| C | -1.56390300 | 0.05761800  | -0.50051300 |
| C | -1.58362100 | 1.01852300  | 0.52669300  |

Frequency and Energy at B3LYP/6-311G(d,p) in gas phase

|                                              |                             |
|----------------------------------------------|-----------------------------|
| Zero-point correction=                       | 0.271531 (Hartree/Particle) |
| Thermal correction to Energy=                | 0.289476                    |
| Thermal correction to Enthalpy=              | 0.290420                    |
| Thermal correction to Gibbs Free Energy=     | 0.225418                    |
| Sum of electronic and zero-point Energies=   | -1031.077110                |
| Sum of electronic and thermal Energies=      | -1031.059165                |
| Sum of electronic and thermal Enthalpies=    | -1031.058221                |
| Sum of electronic and thermal Free Energies= | -1031.123223                |

**Table S5:** Cartesian coordinates of all of the Int, TS of the selective compounds and HOO\* optimized at B3LYP/6-311G(d,p) level of theory in the gas phase

| Name of compound                                       |                             | Int1-1-C3-H-OOH |             |
|--------------------------------------------------------|-----------------------------|-----------------|-------------|
| Cartesian Coordinates optimized at B3LYP/6-311G(d,p)   |                             |                 |             |
| C                                                      | 2.58178500                  | -0.45584200     | -1.11770800 |
| C                                                      | 3.32242500                  | -1.61158400     | -0.92696500 |
| C                                                      | 1.98839600                  | -2.14330600     | 1.05438600  |
| H                                                      | 4.12857500                  | -1.86200900     | -1.60207300 |
| C                                                      | 0.81874600                  | 1.12078800      | -0.32390200 |
| C                                                      | -0.74304800                 | 0.24777700      | 1.47057100  |
| C                                                      | -0.12814900                 | 1.48588700      | 0.81341000  |
| O                                                      | 0.24205200                  | -0.77092900     | 1.74073800  |
| O                                                      | 1.03051200                  | 1.95101200      | -1.24138700 |
| C                                                      | -1.92905500                 | -0.31353900     | 0.70038300  |
| C                                                      | -1.87615400                 | -1.50656100     | -0.01770500 |
| C                                                      | -3.14028100                 | 0.39075300      | 0.72635400  |
| C                                                      | -2.99241200                 | -1.97684300     | -0.70666300 |
| H                                                      | -0.96515500                 | -2.08973800     | -0.04291300 |
| C                                                      | -4.25803100                 | -0.06633700     | 0.04481300  |
| H                                                      | -3.21682300                 | 1.31085300      | 1.29763000  |
| C                                                      | -4.18691700                 | -1.25801200     | -0.68161000 |
| H                                                      | -2.93044800                 | -2.90857600     | -1.26129300 |
| O                                                      | -5.31371300                 | -1.66504100     | -1.33264100 |
| H                                                      | -5.13656300                 | -2.49171200     | -1.79343000 |
| C                                                      | 1.23639500                  | -0.99518000     | 0.86074700  |
| C                                                      | 1.51662600                  | -0.11541700     | -0.22031300 |
| O                                                      | 0.62287100                  | 2.19534900      | 1.78327900  |
| H                                                      | 0.76046800                  | 3.09328500      | 1.42982800  |
| H                                                      | 1.75336100                  | -2.79347300     | 1.88850100  |
| O                                                      | 2.88581700                  | 0.33894500      | -2.14723600 |
| H                                                      | 2.28903500                  | 1.11880900      | -2.11133100 |
| H                                                      | -5.19401400                 | 0.47785500      | 0.06944000  |
| C                                                      | 3.02769400                  | -2.43513000     | 0.16130500  |
| O                                                      | 3.78930700                  | -3.54333600     | 0.30588000  |
| H                                                      | 3.51689500                  | -4.02528800     | 1.09460200  |
| H                                                      | -1.07035500                 | 0.56074900      | 2.46373100  |
| H                                                      | -0.93951000                 | 2.09888300      | 0.40646600  |
| H                                                      | 0.67290600                  | 3.55534600      | -1.11793200 |
| O                                                      | 0.58499900                  | 4.67947700      | 0.36866100  |
| O                                                      | 0.52109200                  | 4.53330900      | -0.94527400 |
| Frequency and Energy at B3LYP/6-311G(d,p) in gas phase |                             |                 |             |
| Zero-point correction=                                 | 0.266154 (Hartree/Particle) |                 |             |
| Thermal correction to Energy=                          | 0.286649                    |                 |             |
| Thermal correction to Enthalpy=                        | 0.287593                    |                 |             |
| Thermal correction to Gibbs Free Energy=               | 0.214595                    |                 |             |
| Sum of electronic and zero-point Energies=             | -1181.141475                |                 |             |
| Sum of electronic and thermal Energies=                | -1181.120981                |                 |             |
| Sum of electronic and thermal Enthalpies=              | -1181.120036                |                 |             |
| Sum of electronic and thermal Free Energies=           | -1181.193034                |                 |             |
| Name of compound                                       |                             | TS-1-C3-H-OOH   |             |
| Cartesian Coordinates optimized at B3LYP/6-311G(d,p)   |                             |                 |             |
| C                                                      | 3.56372000                  | 0.17296300      | 0.34716500  |
| C                                                      | 4.28657300                  | -0.93966300     | -0.05795600 |

|   |             |             |             |
|---|-------------|-------------|-------------|
| C | 2.19799200  | -2.13692400 | -0.50501800 |
| H | 5.36747100  | -0.92349100 | -0.05156400 |
| C | 1.37181000  | 1.31477600  | 0.66790100  |
| C | -0.64431700 | -0.20738000 | 0.70241800  |
| C | -0.11199900 | 1.20512800  | 0.51059400  |
| O | 0.12285300  | -1.11201300 | -0.14527600 |
| O | 1.84776900  | 2.40610200  | 1.03538200  |
| C | -2.10600300 | -0.42124300 | 0.42343000  |
| C | -2.72212700 | 0.07861900  | -0.72765100 |
| C | -2.87128100 | -1.17498900 | 1.31841300  |
| C | -4.06690100 | -0.16982200 | -0.97289400 |
| H | -2.16004600 | 0.67684200  | -1.43429400 |
| C | -4.21595900 | -1.42773800 | 1.08480200  |
| H | -2.40793700 | -1.57095400 | 2.21619500  |
| C | -4.81945700 | -0.92393300 | -0.06857600 |
| H | -4.53542000 | 0.22907800  | -1.86796400 |
| O | -6.14191500 | -1.19541500 | -0.25774500 |
| H | -6.43599900 | -0.78780700 | -1.07908800 |
| C | 1.47511900  | -1.02938900 | -0.09412400 |
| C | 2.13701200  | 0.15001600  | 0.33101600  |
| O | -0.80244600 | 2.15549200  | 1.21007800  |
| H | -0.16735200 | 2.87520500  | 1.37405300  |
| H | 1.66902800  | -3.02691500 | -0.82435300 |
| O | 4.22178400  | 1.27036000  | 0.73958800  |
| H | 3.55496400  | 1.95661400  | 0.96569700  |
| H | -4.81151900 | -2.00720100 | 1.77924700  |
| C | 3.59875900  | -2.07632100 | -0.48767700 |
| O | 4.35375400  | -3.13077700 | -0.87695900 |
| H | 3.78150900  | -3.85117800 | -1.16306800 |
| H | -0.43998700 | -0.49237500 | 1.74444600  |
| H | -0.20647600 | 1.51350900  | -0.75000000 |
| H | 0.53822400  | 3.74874800  | -1.61274500 |
| O | -0.24658800 | 2.07262000  | -1.88066200 |
| O | -0.37822600 | 3.43054600  | -1.59036100 |

Frequency and Energy at B3LYP/6-311G(d,p)in gas phase

|                                              |                             |
|----------------------------------------------|-----------------------------|
| Zero-point correction=                       | 0.259641 (Hartree/Particle) |
| Thermal correction to Energy=                | 0.280178                    |
| Thermal correction to Enthalpy=              | 0.281122                    |
| Thermal correction to Gibbs Free Energy=     | 0.208429                    |
| Sum of electronic and zero-point Energies=   | -1181.116380                |
| Sum of electronic and thermal Energies=      | -1181.095843                |
| Sum of electronic and thermal Enthalpies=    | -1181.094899                |
| Sum of electronic and thermal Free Energies= | -1181.167591                |

| Name of compound                                     | Int2-1-C3-H-OOH |             |             |
|------------------------------------------------------|-----------------|-------------|-------------|
| Cartesian Coordinates optimized at B3LYP/6-311G(d,p) |                 |             |             |
| C                                                    | 2.94332600      | -0.17786400 | -0.71512100 |
| C                                                    | 3.56996000      | -1.41303500 | -0.83710800 |
| C                                                    | 1.93548200      | -2.39642700 | 0.68300300  |
| H                                                    | 4.44854200      | -1.51560900 | -1.45868800 |
| C                                                    | 1.13603200      | 1.25686500  | 0.26636000  |
| C                                                    | -0.70588900     | -0.02135700 | 1.49947000  |
| C                                                    | -0.07593300     | 1.25597700  | 1.01844700  |
| O                                                    | 0.25645500      | -1.09175800 | 1.65077200  |

|   |             |             |             |
|---|-------------|-------------|-------------|
| O | 1.63033200  | 2.31818600  | -0.24724200 |
| C | -1.88324600 | -0.47282400 | 0.65032500  |
| C | -1.82260000 | -0.49882900 | -0.74549100 |
| C | -3.05286100 | -0.91699800 | 1.27434800  |
| C | -2.89722400 | -0.96112700 | -1.49626400 |
| H | -0.93374700 | -0.15410500 | -1.26063300 |
| C | -4.13473800 | -1.37714600 | 0.53673700  |
| H | -3.11910200 | -0.90197500 | 2.35716600  |
| C | -4.05887800 | -1.40209100 | -0.85730500 |
| H | -2.83580900 | -0.97343200 | -2.58052100 |
| O | -5.14637700 | -1.86110200 | -1.53853900 |
| H | -4.97153600 | -1.82138600 | -2.48461500 |
| C | 1.30851900  | -1.16653100 | 0.79736100  |
| C | 1.78154300  | -0.03050100 | 0.10101300  |
| O | -0.78863700 | 2.32901200  | 1.30895400  |
| H | -0.42637000 | 3.17300800  | 0.92063700  |
| H | 1.53982700  | -3.24372100 | 1.23020100  |
| O | 3.45423800  | 0.86769400  | -1.37722500 |
| H | 2.92065600  | 1.65813000  | -1.12219800 |
| H | -5.04316800 | -1.71714200 | 1.01845200  |
| C | 3.06638600  | -2.50699600 | -0.13672600 |
| O | 3.71836400  | -3.68796900 | -0.28775600 |
| H | 3.29040700  | -4.36123100 | 0.25193100  |
| H | -1.06852700 | 0.15636200  | 2.51476900  |
| H | -0.35937500 | 5.70446700  | -1.11391900 |
| H | 0.92872300  | 3.82995500  | -0.15372400 |
| O | -0.53502300 | 4.76274300  | -0.98803400 |
| O | 0.28192400  | 4.50569300  | 0.18492800  |

Frequency and Energy at B3LYP/6-311G(d,p) in gas phase

|                                              |                             |
|----------------------------------------------|-----------------------------|
| Zero-point correction=                       | 0.265174 (Hartree/Particle) |
| Thermal correction to Energy=                | 0.286155                    |
| Thermal correction to Enthalpy=              | 0.287099                    |
| Thermal correction to Gibbs Free Energy=     | 0.211872                    |
| Sum of electronic and zero-point Energies=   | -1181.153297                |
| Sum of electronic and thermal Energies=      | -1181.132316                |
| Sum of electronic and thermal Enthalpies=    | -1181.131372                |
| Sum of electronic and thermal Free Energies= | -1181.206599                |

| Name of compound                                     | Int1-1-O4'-H-OOH |             |             |
|------------------------------------------------------|------------------|-------------|-------------|
| Cartesian Coordinates optimized at B3LYP/6-311G(d,p) |                  |             |             |
| C                                                    | 3.39124100       | 0.44985000  | 1.05461800  |
| C                                                    | 3.73850000       | 1.77706900  | 0.84658500  |
| C                                                    | 2.22999700       | 1.86778200  | -1.07689900 |
| H                                                    | 4.45243200       | 2.26512100  | 1.49519100  |
| C                                                    | 2.13508700       | -1.58681400 | 0.36486800  |
| C                                                    | 0.28428700       | -1.21438700 | -1.33316000 |
| C                                                    | 1.22372500       | -2.22119200 | -0.68441200 |
| O                                                    | 0.99998100       | -0.00416800 | -1.73407300 |
| O                                                    | 2.61524200       | -2.30905500 | 1.25367100  |
| C                                                    | -0.94521000      | -0.84631700 | -0.52972600 |
| C                                                    | -2.02385000      | -0.26452800 | -1.20448700 |
| C                                                    | -1.06056000      | -1.02576500 | 0.85438600  |
| C                                                    | -3.17485100      | 0.12790200  | -0.53444300 |
| H                                                    | -1.95852700      | -0.11084300 | -2.27670300 |

|   |             |             |             |
|---|-------------|-------------|-------------|
| C | -2.20743600 | -0.64184700 | 1.53770100  |
| H | -0.25638300 | -1.47677600 | 1.42331600  |
| C | -3.27522700 | -0.05906300 | 0.84994600  |
| H | -3.99942400 | 0.57450000  | -1.07993000 |
| O | -4.36970200 | 0.29559800  | 1.56530600  |
| H | -5.04152300 | 0.68651400  | 0.98433400  |
| C | 1.87656900  | 0.54291100  | -0.86791500 |
| C | 2.44855800  | -0.19799700 | 0.19750100  |
| O | 2.04803600  | -2.76096600 | -1.71822700 |
| H | 2.65864500  | -3.38101200 | -1.30349800 |
| H | 1.77343000  | 2.41401600  | -1.89370600 |
| O | 3.95818800  | -0.21930400 | 2.06433800  |
| H | 3.61206500  | -1.14307800 | 2.03433700  |
| H | -2.29429100 | -0.78531900 | 2.60774900  |
| C | 3.15968700  | 2.46805300  | -0.21876300 |
| O | 3.53370500  | 3.76176300  | -0.38035200 |
| H | 3.07784100  | 4.13344900  | -1.14316500 |
| H | -0.02052200 | -1.63507500 | -2.29232900 |
| H | 0.63679700  | -3.01040900 | -0.20228400 |
| H | -8.17610200 | 0.89166000  | -0.63279400 |
| O | -6.51815500 | 1.44210500  | -0.04926600 |
| O | -7.42573800 | 0.48444000  | -0.15831200 |

Frequency and Energy at B3LYP/6-311G(d,p)in gas phase

|                                              |                             |
|----------------------------------------------|-----------------------------|
| Zero-point correction=                       | 0.264768 (Hartree/Particle) |
| Thermal correction to Energy=                | 0.286388                    |
| Thermal correction to Enthalpy=              | 0.287333                    |
| Thermal correction to Gibbs Free Energy=     | 0.208939                    |
| Sum of electronic and zero-point Energies=   | -1181.126198                |
| Sum of electronic and thermal Energies=      | -1181.104577                |
| Sum of electronic and thermal Enthalpies=    | -1181.103633                |
| Sum of electronic and thermal Free Energies= | -1181.182027                |

| Name of compound                                     |             | TS-1-O4'-H-OOH |             |
|------------------------------------------------------|-------------|----------------|-------------|
| Cartesian Coordinates optimized at B3LYP/6-311G(d,p) |             |                |             |
| C                                                    | 3.08256500  | 0.78084700     | 1.16077600  |
| C                                                    | 3.27115900  | 2.12550400     | 0.87347400  |
| C                                                    | 1.95058700  | 1.87296900     | -1.17033600 |
| H                                                    | 3.85102500  | 2.75112700     | 1.53753000  |
| C                                                    | 2.17889300  | -1.45421600    | 0.53397900  |
| C                                                    | 0.46022800  | -1.44928200    | -1.32440900 |
| C                                                    | 1.46859400  | -2.27651200    | -0.54076500 |
| O                                                    | 1.03960200  | -0.19208900    | -1.77192200 |
| O                                                    | 2.65726100  | -2.04023500    | 1.51751500  |
| C                                                    | -0.85745800 | -1.17007100    | -0.62519700 |
| C                                                    | -1.88890200 | -0.59028900    | -1.38877200 |
| C                                                    | -1.09733000 | -1.43977100    | 0.73391500  |
| C                                                    | -3.11628000 | -0.29744400    | -0.83505100 |
| H                                                    | -1.70981400 | -0.37816200    | -2.43713600 |
| C                                                    | -2.31329800 | -1.13546000    | 1.31490800  |
| H                                                    | -0.32689700 | -1.88467200    | 1.35161400  |
| C                                                    | -3.35970200 | -0.56033300    | 0.54536500  |
| H                                                    | -3.91475700 | 0.12897500     | -1.42988400 |
| O                                                    | -4.50909200 | -0.31103500    | 1.10293200  |
| H                                                    | -5.07463600 | 0.57835300     | 0.57631400  |

|   |             |             |             |
|---|-------------|-------------|-------------|
| C | 1.75794500  | 0.53218200  | -0.88205400 |
| C | 2.31826100  | -0.04920300 | 0.28293100  |
| O | 2.44224200  | -2.74081200 | -1.47297400 |
| H | 3.09445800  | -3.25199800 | -0.98046900 |
| H | 1.50466600  | 2.29289800  | -2.06399000 |
| O | 3.63414800  | 0.26968600  | 2.26554500  |
| H | 3.41669300  | -0.69217100 | 2.28606100  |
| H | -2.50309700 | -1.32740100 | 2.36368700  |
| C | 2.71122200  | 2.65477300  | -0.28951200 |
| O | 2.92726200  | 3.97111600  | -0.52486600 |
| H | 2.50346200  | 4.22531900  | -1.35182400 |
| H | 0.26828500  | -1.97632300 | -2.26096900 |
| H | 0.96029700  | -3.11811600 | -0.05737000 |
| H | -7.28602400 | 2.19246900  | 0.45080700  |
| O | -5.54848600 | 1.60191800  | 0.16947900  |
| O | -6.91575800 | 1.34114400  | 0.17430700  |

Frequency and Energy at B3LYP/6-311G(d,p)in gas phase

|                                              |                             |
|----------------------------------------------|-----------------------------|
| Zero-point correction=                       | 0.259849 (Hartree/Particle) |
| Thermal correction to Energy=                | 0.280485                    |
| Thermal correction to Enthalpy=              | 0.281429                    |
| Thermal correction to Gibbs Free Energy=     | 0.207169                    |
| Sum of electronic and zero-point Energies=   | -1181.113570                |
| Sum of electronic and thermal Energies=      | -1181.092934                |
| Sum of electronic and thermal Enthalpies=    | -1181.091990                |
| Sum of electronic and thermal Free Energies= | -1181.166250                |

| Name of compound                                     | Int2-1-O4'-H-OOH |             |             |
|------------------------------------------------------|------------------|-------------|-------------|
| Cartesian Coordinates optimized at B3LYP/6-311G(d,p) |                  |             |             |
| C                                                    | 3.27379500       | 0.49534300  | 1.06697300  |
| C                                                    | 3.55289900       | 1.84531000  | 0.90579900  |
| C                                                    | 2.04135000       | 1.92819800  | -1.01634600 |
| H                                                    | 4.24113400       | 2.34514900  | 1.57295100  |
| C                                                    | 2.13163700       | -1.57974700 | 0.29446300  |
| C                                                    | 0.26445800       | -1.22702400 | -1.37157100 |
| C                                                    | 1.26655800       | -2.21520200 | -0.79400900 |
| O                                                    | 0.90205500       | 0.02097900  | -1.74135400 |
| O                                                    | 2.63854500       | -2.30941600 | 1.15951300  |
| C                                                    | -0.94916000      | -0.92236700 | -0.50961100 |
| C                                                    | -1.94362100      | -0.08436700 | -1.07391200 |
| C                                                    | -1.12670400      | -1.41745100 | 0.80080000  |
| C                                                    | -3.07577400      | 0.24857000  | -0.38003300 |
| H                                                    | -1.79122500      | 0.29790900  | -2.07697600 |
| C                                                    | -2.25171700      | -1.09983200 | 1.52425500  |
| H                                                    | -0.37470500      | -2.05168900 | 1.25393400  |
| C                                                    | -3.28470600      | -0.25196100 | 0.96618000  |
| H                                                    | -3.84768700      | 0.88133800  | -0.80261500 |
| O                                                    | -4.31225700      | 0.03066000  | 1.63065300  |
| H                                                    | -5.55210400      | 1.05276000  | 0.74396500  |
| C                                                    | 1.75957000       | 0.58364200  | -0.85242500 |
| C                                                    | 2.36583700       | -0.16882000 | 0.18444200  |
| O                                                    | 2.10827200       | -2.62413400 | -1.86766900 |
| H                                                    | 2.76069800       | -3.23725000 | -1.51025800 |
| H                                                    | 1.55860600       | 2.47962600  | -1.81419200 |
| O                                                    | 3.87396800       | -0.17725600 | 2.05300000  |

|   |             |             |             |
|---|-------------|-------------|-------------|
| H | 3.57878900  | -1.11604000 | 1.99544000  |
| H | -2.40539000 | -1.46673300 | 2.53181000  |
| C | 2.94241500  | 2.54476100  | -0.13509400 |
| O | 3.25111400  | 3.85739800  | -0.24926600 |
| H | 2.78000800  | 4.23895300  | -0.99810200 |
| H | -0.07281100 | -1.62957900 | -2.32954900 |
| H | 0.73836300  | -3.07424700 | -0.36560500 |
| H | -7.74954000 | 0.89227300  | -0.22812400 |
| O | -6.04155100 | 1.61613300  | 0.10847100  |
| O | -6.87829000 | 0.62478800  | -0.54736500 |

Frequency and Energy at B3LYP/6-311G(d,p) in gas phase

|                                              |                             |
|----------------------------------------------|-----------------------------|
| Zero-point correction=                       | 0.264537 (Hartree/Particle) |
| Thermal correction to Energy=                | 0.285966                    |
| Thermal correction to Enthalpy=              | 0.286910                    |
| Thermal correction to Gibbs Free Energy=     | 0.210413                    |
| Sum of electronic and zero-point Energies=   | -1181.127178                |
| Sum of electronic and thermal Energies=      | -1181.105749                |
| Sum of electronic and thermal Enthalpies=    | -1181.104805                |
| Sum of electronic and thermal Free Energies= | -1181.181303                |

| Name of compound                                     | Int1-9-C4-H-OOH |             |             |
|------------------------------------------------------|-----------------|-------------|-------------|
| Cartesian Coordinates optimized at B3LYP/6-311G(d,p) |                 |             |             |
| C                                                    | -2.90143200     | 0.62284000  | 1.26603500  |
| C                                                    | -3.96459400     | -0.11817200 | 0.74821000  |
| C                                                    | -3.86507600     | -0.64119600 | -0.53890000 |
| C                                                    | -2.72291300     | -0.43176400 | -1.31686500 |
| H                                                    | -2.96879400     | 1.07429400  | 2.24707000  |
| H                                                    | -4.86773700     | -0.27021500 | 1.33029300  |
| C                                                    | -0.57952600     | 1.62264600  | 1.05227100  |
| C                                                    | 0.56590700      | 1.21516200  | -1.17660700 |
| C                                                    | 0.17928700      | 2.26301000  | -0.10717300 |
| O                                                    | -0.59311900     | 0.48305800  | -1.61819700 |
| O                                                    | -2.62608600     | -0.93774900 | -2.57299300 |
| H                                                    | -3.45029800     | -1.40632700 | -2.75841900 |
| O                                                    | -4.84377000     | -1.38672200 | -1.15394800 |
| H                                                    | -5.60715800     | -1.47078100 | -0.57506200 |
| O                                                    | 1.30057600      | 2.99816000  | 0.36562400  |
| H                                                    | 1.97325000      | 2.36475600  | 0.64963600  |
| H                                                    | -0.47969700     | 3.00356000  | -0.56785700 |
| C                                                    | 1.68117200      | 0.27820100  | -0.74370900 |
| C                                                    | 1.42196400      | -0.97139900 | -0.18232700 |
| C                                                    | 3.01181800      | 0.69483700  | -0.89775000 |
| C                                                    | 2.47304600      | -1.78563000 | 0.23896300  |
| H                                                    | 0.40777100      | -1.32671800 | -0.07152600 |
| C                                                    | 4.06304000      | -0.11225400 | -0.47917300 |
| H                                                    | 3.25235500      | 1.64265000  | -1.36619300 |
| C                                                    | 3.78558200      | -1.36088300 | 0.09794900  |
| H                                                    | 2.26041700      | -2.75179500 | 0.68603500  |
| H                                                    | 0.89841900      | 1.75804100  | -2.06356200 |
| O                                                    | 4.89134400      | -2.08447900 | 0.47827300  |
| H                                                    | 4.62066400      | -2.93122300 | 0.84624500  |
| C                                                    | -1.65989900     | 0.31645500  | -0.78717600 |
| C                                                    | -1.74446400     | 0.83521100  | 0.51184200  |
| O                                                    | 5.34749600      | 0.30655100  | -0.63842500 |

|                                                        |                             |             |             |
|--------------------------------------------------------|-----------------------------|-------------|-------------|
| H                                                      | 5.92788800                  | -0.39040100 | -0.30581400 |
| H                                                      | 0.10210300                  | 0.94046700  | 1.58378200  |
| O                                                      | -1.04995800                 | 2.61839800  | 1.95104400  |
| H                                                      | -0.29244200                 | 3.18739700  | 2.13505200  |
| H                                                      | -2.15281500                 | -1.37866800 | 1.78311700  |
| O                                                      | -0.49207100                 | -1.85626600 | 2.45494600  |
| O                                                      | -1.69533900                 | -2.21688000 | 2.02538200  |
| Frequency and Energy at B3LYP/6-311G(d,p) in gas phase |                             |             |             |
| Zero-point correction=                                 | 0.291175 (Hartree/Particle) |             |             |
| Thermal correction to Energy=                          | 0.315050                    |             |             |
| Thermal correction to Enthalpy=                        | 0.315995                    |             |             |
| Thermal correction to Gibbs Free Energy=               | 0.235227                    |             |             |
| Sum of electronic and zero-point Energies=             | -1257.528541                |             |             |
| Sum of electronic and thermal Energies=                | -1257.504666                |             |             |
| Sum of electronic and thermal Enthalpies=              | -1257.503722                |             |             |
| Sum of electronic and thermal Free Energies=           | -1257.584489                |             |             |

| Name of compound                                     |             | TS-9-C4-H-OOH |             |
|------------------------------------------------------|-------------|---------------|-------------|
| Cartesian Coordinates optimized at B3LYP/6-311G(d,p) |             |               |             |
| C                                                    | -3.09345600 | 1.05306300    | 0.84141600  |
| C                                                    | -4.07089700 | 0.07561400    | 0.93899600  |
| C                                                    | -3.92036800 | -1.11251400   | 0.22309700  |
| C                                                    | -2.80856000 | -1.33357800   | -0.59456700 |
| H                                                    | -3.19480800 | 1.99088600    | 1.37116000  |
| H                                                    | -4.94858700 | 0.22746200    | 1.55894800  |
| C                                                    | -0.90403100 | 1.86648900    | -0.07685800 |
| C                                                    | 0.35355200  | 0.24892200    | -1.60945600 |
| C                                                    | -0.02873800 | 1.72144400    | -1.31340400 |
| O                                                    | -0.80161800 | -0.60903300   | -1.54575300 |
| O                                                    | -2.67157200 | -2.48820300   | -1.30038600 |
| H                                                    | -3.45090800 | -3.02895700   | -1.11928400 |
| O                                                    | -4.82376800 | -2.14809900   | 0.24847500  |
| H                                                    | -5.57200800 | -1.91787800   | 0.80730100  |
| O                                                    | 1.09787400  | 2.58252000    | -1.23153200 |
| H                                                    | 1.69146300  | 2.22626600    | -0.55493200 |
| H                                                    | -0.61056400 | 2.09592100    | -2.16288800 |
| C                                                    | 1.50323000  | -0.29960800   | -0.78189800 |
| C                                                    | 1.30099400  | -1.10761700   | 0.33343800  |
| C                                                    | 2.81352000  | 0.00946000    | -1.17651500 |
| C                                                    | 2.39113600  | -1.58488300   | 1.05935800  |
| H                                                    | 0.30209200  | -1.36274900   | 0.65575400  |
| C                                                    | 3.90230000  | -0.45902100   | -0.45379400 |
| H                                                    | 3.00607100  | 0.61087100    | -2.05748400 |
| C                                                    | 3.68331000  | -1.26193400   | 0.67526300  |
| H                                                    | 2.22821200  | -2.20293400   | 1.93694100  |
| H                                                    | 0.65271400  | 0.20710400    | -2.65860500 |
| O                                                    | 4.82353300  | -1.68284600   | 1.32119400  |
| H                                                    | 4.58794700  | -2.19372200   | 2.10140900  |
| C                                                    | -1.82653000 | -0.34031100   | -0.69307100 |
| C                                                    | -1.96459700 | 0.85948700    | 0.03150700  |
| O                                                    | 5.16845700  | -0.14855000   | -0.84799800 |
| H                                                    | 5.77868400  | -0.56378000   | -0.22507200 |
| H                                                    | -0.12770100 | 1.67510000    | 0.92967100  |



|                                                        |                             |            |             |
|--------------------------------------------------------|-----------------------------|------------|-------------|
| O                                                      | -1.36231600                 | 3.17467100 | 0.09266000  |
| H                                                      | -0.59874700                 | 3.74908800 | -0.05672300 |
| H                                                      | -0.59238600                 | 0.99391600 | 3.28655600  |
| O                                                      | 0.58066900                  | 1.66874800 | 1.99298000  |
| O                                                      | 0.09665500                  | 0.58620800 | 2.74113200  |
| Frequency and Energy at B3LYP/6-311G(d,p) in gas phase |                             |            |             |
| Zero-point correction=                                 | 0.286210 (Hartree/Particle) |            |             |
| Thermal correction to Energy=                          | 0.309257                    |            |             |
| Thermal correction to Enthalpy=                        | 0.310202                    |            |             |
| Thermal correction to Gibbs Free Energy=               | 0.232545                    |            |             |
| Sum of electronic and zero-point Energies=             | -1257.509754                |            |             |
| Sum of electronic and thermal Energies=                | -1257.486707                |            |             |
| Sum of electronic and thermal Enthalpies=              | -1257.485763                |            |             |
| Sum of electronic and thermal Free Energies=           | -1257.563419                |            |             |

| Name of compound                                     |             | Int2-9-C4-H-OOH |             |
|------------------------------------------------------|-------------|-----------------|-------------|
| Cartesian Coordinates optimized at B3LYP/6-311G(d,p) |             |                 |             |
| C                                                    | -2.77950400 | 0.52707300      | 1.35849400  |
| C                                                    | -3.73962000 | -0.36020900     | 0.88831600  |
| C                                                    | -3.69200800 | -0.80268700     | -0.43420100 |
| C                                                    | -2.66942400 | -0.38296400     | -1.30370500 |
| H                                                    | -2.81455500 | 0.89302500      | 2.37539600  |
| H                                                    | -4.54198100 | -0.69345500     | 1.53956500  |
| C                                                    | -0.75626400 | 1.90245600      | 0.88886400  |
| C                                                    | 0.49211100  | 1.44067100      | -1.22810600 |
| C                                                    | 0.18478700  | 2.48366500      | -0.11760000 |
| O                                                    | -0.73083600 | 0.87959600      | -1.72366800 |
| O                                                    | -2.61058400 | -0.84260200     | -2.58251000 |
| H                                                    | -3.35661400 | -1.44364900     | -2.70439400 |
| O                                                    | -4.59465800 | -1.67639600     | -0.99716200 |
| H                                                    | -5.24072800 | -1.95058500     | -0.33957700 |
| O                                                    | 1.35666700  | 2.99536500      | 0.52158500  |
| H                                                    | 1.92624400  | 2.24322300      | 0.73748100  |
| H                                                    | -0.26462500 | 3.36266600      | -0.59892600 |
| C                                                    | 1.50647200  | 0.39024400      | -0.80335700 |
| C                                                    | 1.13550800  | -0.85888600     | -0.30168100 |
| C                                                    | 2.87082600  | 0.69672200      | -0.91935300 |
| C                                                    | 2.11056100  | -1.77719500     | 0.09477800  |
| H                                                    | 0.09665400  | -1.14813000     | -0.22849000 |
| C                                                    | 3.84530500  | -0.21246200     | -0.52287100 |
| H                                                    | 3.19965100  | 1.64065900      | -1.33969900 |
| C                                                    | 3.45679500  | -1.45867300     | -0.00795100 |
| H                                                    | 1.80774000  | -2.74649200     | 0.47910700  |
| H                                                    | 0.90135100  | 1.97658400      | -2.08597800 |
| O                                                    | 4.49108200  | -2.28766200     | 0.35177400  |
| H                                                    | 4.14703800  | -3.12711900     | 0.67275500  |
| C                                                    | -1.70471900 | 0.50157400      | -0.83753000 |
| C                                                    | -1.74555100 | 0.98513300      | 0.50269300  |
| O                                                    | 5.16067300  | 0.10663600      | -0.64504100 |
| H                                                    | 5.67871500  | -0.65000000     | -0.34067800 |
| H                                                    | 0.41936200  | -1.07325800     | 2.09964200  |
| O                                                    | -0.75770100 | 2.44654800      | 2.13233900  |
| H                                                    | 0.03279700  | 3.00654200      | 2.18245600  |
| H                                                    | -1.79936100 | -1.64484500     | 1.71558800  |

|                                                       |                             |             |            |
|-------------------------------------------------------|-----------------------------|-------------|------------|
| O                                                     | -0.19197800                 | -1.51762800 | 2.70692500 |
| O                                                     | -1.03308100                 | -2.24035000 | 1.77263300 |
| Frequency and Energy at B3LYP/6-311G(d,p)in gas phase |                             |             |            |
| Zero-point correction=                                | 0.290890 (Hartree/Particle) |             |            |
| Thermal correction to Energy=                         | 0.314886                    |             |            |
| Thermal correction to Enthalpy=                       | 0.315831                    |             |            |
| Thermal correction to Gibbs Free Energy=              | 0.236400                    |             |            |
| Sum of electronic and zero-point Energies=            | -1257.534007                |             |            |
| Sum of electronic and thermal Energies=               | -1257.510011                |             |            |
| Sum of electronic and thermal Enthalpies=             | -1257.509067                |             |            |
| Sum of electronic and thermal Free Energies=          | -1257.588497                |             |            |

| Name of compound                                      |             | Int1-9-O7-H-OOH |             |
|-------------------------------------------------------|-------------|-----------------|-------------|
| Cartesian Coordinates optimized at B3LYP/6-311G(d,p)  |             |                 |             |
| C                                                     | -2.27086100 | 1.11487200      | 1.00747300  |
| C                                                     | -3.36018000 | 0.30992700      | 0.69204100  |
| C                                                     | -3.26146400 | -0.58241500     | -0.37355100 |
| C                                                     | -2.08562000 | -0.67029500     | -1.12731800 |
| H                                                     | -2.33265600 | 1.82730000      | 1.81947600  |
| H                                                     | -4.27970100 | 0.37426900      | 1.26236300  |
| C                                                     | 0.10872400  | 1.89401300      | 0.60959800  |
| C                                                     | 1.29969700  | 0.74394500      | -1.31198000 |
| C                                                     | 0.96102400  | 2.09433600      | -0.63947200 |
| O                                                     | 0.10248800  | 0.01492600      | -1.61054300 |
| O                                                     | -1.99467200 | -1.54109100     | -2.17150900 |
| H                                                     | -2.85183900 | -1.98381000     | -2.23147500 |
| O                                                     | -4.25777800 | -1.43103800     | -0.77952100 |
| H                                                     | -5.06883000 | -1.29253000     | -0.26528400 |
| O                                                     | 2.11737800  | 2.87206500      | -0.34597900 |
| H                                                     | 2.70497200  | 2.33383700      | 0.20044900  |
| H                                                     | 0.38207200  | 2.69302900      | -1.34697600 |
| C                                                     | 2.29285300  | -0.10626600     | -0.53270100 |
| C                                                     | 1.88667100  | -1.19141600     | 0.24315200  |
| C                                                     | 3.65922500  | 0.20356800      | -0.60870300 |
| C                                                     | 2.82740700  | -1.94135300     | 0.95051900  |
| H                                                     | 0.84310500  | -1.47138200     | 0.28382700  |
| C                                                     | 4.59914500  | -0.53742600     | 0.09743300  |
| H                                                     | 4.01694600  | 1.00776000      | -1.24182700 |
| C                                                     | 4.17416100  | -1.61645700     | 0.88653800  |
| H                                                     | 2.50653600  | -2.78801600     | 1.55051200  |
| H                                                     | 1.73673900  | 0.96606700      | -2.28818400 |
| O                                                     | 5.17934300  | -2.29060500     | 1.54206500  |
| H                                                     | 4.81812100  | -3.05313700     | 2.00393700  |
| C                                                     | -0.99889000 | 0.15018800      | -0.80309100 |
| C                                                     | -1.08631800 | 1.04032200      | 0.27514800  |
| O                                                     | 5.92018700  | -0.22264300     | 0.00927200  |
| H                                                     | 6.41081100  | -0.86102800     | 0.54295300  |
| H                                                     | 0.72834800  | 1.38131700      | 1.36521800  |
| O                                                     | -0.31528800 | 3.14918800      | 1.12809800  |
| H                                                     | 0.47393300  | 3.70437100      | 1.14965800  |
| H                                                     | -7.70750900 | -0.32645400     | 1.90756200  |
| O                                                     | -6.81555700 | -1.19604800     | 0.54871800  |
| O                                                     | -6.79291200 | -0.34786000     | 1.56655700  |
| Frequency and Energy at B3LYP/6-311G(d,p)in gas phase |             |                 |             |

|                                              |                             |
|----------------------------------------------|-----------------------------|
| Zero-point correction=                       | 0.291630 (Hartree/Particle) |
| Thermal correction to Energy=                | 0.315356                    |
| Thermal correction to Enthalpy=              | 0.316300                    |
| Thermal correction to Gibbs Free Energy=     | 0.234768                    |
| Sum of electronic and zero-point Energies=   | -1257.527001                |
| Sum of electronic and thermal Energies=      | -1257.503276                |
| Sum of electronic and thermal Enthalpies=    | -1257.502332                |
| Sum of electronic and thermal Free Energies= | -1257.583864                |

| Name of compound                                       |                             | TS-9-O7-H-OOH |             |
|--------------------------------------------------------|-----------------------------|---------------|-------------|
| Cartesian Coordinates optimized at B3LYP/6-311G(d,p)   |                             |               |             |
| C                                                      | -2.28042600                 | 1.06526900    | 1.24474300  |
| C                                                      | -3.34978900                 | 0.20153800    | 1.13117200  |
| C                                                      | -3.30526100                 | -0.82219000   | 0.16220600  |
| C                                                      | -2.16816900                 | -0.94526100   | -0.68436800 |
| H                                                      | -2.29614100                 | 1.87027600    | 1.96736800  |
| H                                                      | -4.22728600                 | 0.29862500    | 1.75568100  |
| C                                                      | 0.03743500                  | 1.86162600    | 0.56825000  |
| C                                                      | 1.12493700                  | 0.56588400    | -1.32451700 |
| C                                                      | 0.76906000                  | 1.96454500    | -0.76842700 |
| O                                                      | -0.04907400                 | -0.25708900   | -1.41496900 |
| O                                                      | -2.14617800                 | -1.91498800   | -1.61699200 |
| H                                                      | -2.99640400                 | -2.37846100   | -1.52932300 |
| O                                                      | -4.24208300                 | -1.73748000   | -0.02950300 |
| H                                                      | -5.28332700                 | -1.41632400   | 0.11240600  |
| O                                                      | 1.89947300                  | 2.82016100    | -0.65971000 |
| H                                                      | 2.57245000                  | 2.36127500    | -0.13945200 |
| H                                                      | 0.09984700                  | 2.45788500    | -1.47778800 |
| C                                                      | 2.23880100                  | -0.13748500   | -0.56409100 |
| C                                                      | 1.97808900                  | -1.13120100   | 0.37847000  |
| C                                                      | 3.56958500                  | 0.22198700    | -0.82621300 |
| C                                                      | 3.02832700                  | -1.74330900   | 1.06432900  |
| H                                                      | 0.96271800                  | -1.45154900   | 0.56697400  |
| C                                                      | 4.61841700                  | -0.38031800   | -0.14185000 |
| H                                                      | 3.81358400                  | 0.95414500    | -1.58776500 |
| C                                                      | 4.34017900                  | -1.36919100   | 0.81441000  |
| H                                                      | 2.82011800                  | -2.52070200   | 1.79346000  |
| H                                                      | 1.44783700                  | 0.69763200    | -2.35937900 |
| O                                                      | 5.44451300                  | -1.90746900   | 1.43141900  |
| H                                                      | 5.18058300                  | -2.61632200   | 2.02590100  |
| C                                                      | -1.08777900                 | -0.06422500   | -0.54579700 |
| C                                                      | -1.14157100                 | 0.93717800    | 0.42565500  |
| O                                                      | 5.90108700                  | -0.01958000   | -0.41122300 |
| H                                                      | 6.48275500                  | -0.56033200   | 0.13889500  |
| H                                                      | 0.73827500                  | 1.44046400    | 1.30972300  |
| O                                                      | -0.39658200                 | 3.14197000    | 1.00105300  |
| H                                                      | 0.36134100                  | 3.72959300    | 0.89168300  |
| H                                                      | -7.05500100                 | 0.77708600    | -0.02104900 |
| O                                                      | -6.50850600                 | -1.00003000   | -0.01374600 |
| O                                                      | -6.50919800                 | 0.25045800    | 0.58227300  |
| Frequency and Energy at B3LYP/6-311G(d,p) in gas phase |                             |               |             |
| Zero-point correction=                                 | 0.287443 (Hartree/Particle) |               |             |
| Thermal correction to Energy=                          | 0.309948                    |               |             |
| Thermal correction to Enthalpy=                        | 0.310892                    |               |             |

|                                              |              |
|----------------------------------------------|--------------|
| Thermal correction to Gibbs Free Energy=     | 0.233076     |
| Sum of electronic and zero-point Energies=   | -1257.524122 |
| Sum of electronic and thermal Energies=      | -1257.501618 |
| Sum of electronic and thermal Enthalpies=    | -1257.500673 |
| Sum of electronic and thermal Free Energies= | -1257.578490 |

| Name of compound                                       |                             | Int2-9-O7-H-OOH |             |
|--------------------------------------------------------|-----------------------------|-----------------|-------------|
| Cartesian Coordinates optimized at B3LYP/6-311G(d,p)   |                             |                 |             |
| C                                                      | -2.32215300                 | 1.14181300      | 1.00795800  |
| C                                                      | -3.41973700                 | 0.38578900      | 0.71349000  |
| C                                                      | -3.35726900                 | -0.53508100     | -0.38715100 |
| C                                                      | -2.11182900                 | -0.61407100     | -1.14869500 |
| H                                                      | -2.34509100                 | 1.85632100      | 1.82055200  |
| H                                                      | -4.34732200                 | 0.45000100      | 1.26950900  |
| C                                                      | 0.09222500                  | 1.87295700      | 0.63477300  |
| C                                                      | 1.30487100                  | 0.75696900      | -1.29855900 |
| C                                                      | 0.96421100                  | 2.09459500      | -0.60124700 |
| O                                                      | 0.10214900                  | 0.02719900      | -1.60536200 |
| O                                                      | -2.08557300                 | -1.47007100     | -2.16435200 |
| H                                                      | -2.97883000                 | -1.87482300     | -2.16187100 |
| O                                                      | -4.28773500                 | -1.29467800     | -0.77037600 |
| H                                                      | -5.85279000                 | -1.46317400     | 0.15382700  |
| O                                                      | 2.11720400                  | 2.85544900      | -0.27173900 |
| H                                                      | 2.71474000                  | 2.29115400      | 0.23709900  |
| H                                                      | 0.39788900                  | 2.71446600      | -1.30087400 |
| C                                                      | 2.29818800                  | -0.10565700     | -0.53702100 |
| C                                                      | 1.89453300                  | -1.18174800     | 0.25241500  |
| C                                                      | 3.66582600                  | 0.19152000      | -0.63842600 |
| C                                                      | 2.83994500                  | -1.93880800     | 0.94615500  |
| H                                                      | 0.85014400                  | -1.45534000     | 0.31381900  |
| C                                                      | 4.61053000                  | -0.55540800     | 0.05496300  |
| H                                                      | 4.02099800                  | 0.98886800      | -1.28161000 |
| C                                                      | 4.18844600                  | -1.62779400     | 0.85673000  |
| H                                                      | 2.52092700                  | -2.77964900     | 1.55470700  |
| H                                                      | 1.73397400                  | 0.99594700      | -2.27355000 |
| O                                                      | 5.19794800                  | -2.30652700     | 1.49471900  |
| H                                                      | 4.84260800                  | -3.06163400     | 1.97355000  |
| C                                                      | -1.00263100                 | 0.17751200      | -0.81736000 |
| C                                                      | -1.10705000                 | 1.04542200      | 0.26429600  |
| O                                                      | 5.93008700                  | -0.25323900     | -0.05784300 |
| H                                                      | 6.42770300                  | -0.89194000     | 0.46941600  |
| H                                                      | 0.68907100                  | 1.31803700      | 1.37954000  |
| O                                                      | -0.32484800                 | 3.11151700      | 1.18461000  |
| H                                                      | 0.46602900                  | 3.66283200      | 1.23375300  |
| H                                                      | -7.32472800                 | 0.18442100      | 1.09231000  |
| O                                                      | -6.67754800                 | -1.53928900     | 0.67727600  |
| O                                                      | -6.60217900                 | -0.32830400     | 1.47630300  |
| Frequency and Energy at B3LYP/6-311G(d,p) in gas phase |                             |                 |             |
| Zero-point correction=                                 | 0.290890 (Hartree/Particle) |                 |             |
| Thermal correction to Energy=                          | 0.314886                    |                 |             |
| Thermal correction to Enthalpy=                        | 0.315831                    |                 |             |
| Thermal correction to Gibbs Free Energy=               | 0.236400                    |                 |             |
| Sum of electronic and zero-point Energies=             | -1257.534007                |                 |             |
| Sum of electronic and thermal Energies=                | -1257.510011                |                 |             |

|                                              |              |
|----------------------------------------------|--------------|
| Sum of electronic and thermal Enthalpies=    | -1257.509067 |
| Sum of electronic and thermal Free Energies= | -1257.588497 |

| Name of compound                                       |                             | Int1-9-O4'-H-OOH |             |
|--------------------------------------------------------|-----------------------------|------------------|-------------|
| Cartesian Coordinates optimized at B3LYP/6-311G(d,p)   |                             |                  |             |
| C                                                      | 3.46282500                  | 0.10024000       | 1.61567000  |
| C                                                      | 4.21551500                  | 1.21981100       | 1.27892500  |
| C                                                      | 3.99456300                  | 1.84338400       | 0.05487200  |
| C                                                      | 3.03774600                  | 1.36118300       | -0.84048100 |
| H                                                      | 3.62941800                  | -0.41296900      | 2.55325700  |
| H                                                      | 4.97039500                  | 1.60528700       | 1.95707600  |
| C                                                      | 1.65732800                  | -1.60108200      | 1.09045700  |
| C                                                      | 0.53781800                  | -1.31701800      | -1.16738800 |
| C                                                      | 1.22234100                  | -2.30199600      | -0.19320300 |
| O                                                      | 1.38964500                  | -0.19103400      | -1.43403500 |
| O                                                      | 2.82870500                  | 1.96824200       | -2.04270600 |
| H                                                      | 3.45677800                  | 2.69943900       | -2.10101300 |
| O                                                      | 4.67633200                  | 2.96053000       | -0.38207800 |
| H                                                      | 5.36108800                  | 3.18887100       | 0.25306700  |
| O                                                      | 0.41405700                  | -3.43699700      | 0.09658600  |
| H                                                      | -0.45054000                 | -3.11787500      | 0.38806400  |
| H                                                      | 2.11892400                  | -2.69986900      | -0.67551300 |
| C                                                      | -0.84826200                 | -0.87408700      | -0.72546100 |
| C                                                      | -1.06482300                 | 0.33723300       | -0.07006700 |
| C                                                      | -1.94385100                 | -1.71146500      | -0.98815000 |
| C                                                      | -2.35035900                 | 0.70227500       | 0.33394700  |
| H                                                      | -0.23934500                 | 1.01218000       | 0.11121200  |
| C                                                      | -3.22385000                 | -1.35413400      | -0.58400800 |
| H                                                      | -1.82209900                 | -2.63836700      | -1.53770300 |
| C                                                      | -3.42942100                 | -0.13613200      | 0.08565500  |
| H                                                      | -2.51396300                 | 1.64686500       | 0.84174700  |
| H                                                      | 0.44292900                  | -1.82243200      | -2.13096900 |
| O                                                      | -4.72683400                 | 0.12058500       | 0.43501300  |
| H                                                      | -4.82064600                 | 1.02126900       | 0.78606600  |
| C                                                      | 2.28828800                  | 0.22923600       | -0.49173100 |
| C                                                      | 2.49448100                  | -0.39727100      | 0.74453900  |
| O                                                      | -4.27893200                 | -2.17150000      | -0.84887900 |
| H                                                      | -5.07131200                 | -1.73054600      | -0.51345700 |
| H                                                      | 0.74984800                  | -1.27658300      | 1.62669000  |
| O                                                      | 2.39680700                  | -2.49116000      | 1.91667400  |
| H                                                      | 1.88436000                  | -3.30874500      | 1.94347800  |
| H                                                      | -5.53590400                 | 4.43348000       | 0.57473300  |
| O                                                      | -5.06372800                 | 2.83543300       | 1.35913000  |
| O                                                      | -5.44379600                 | 3.50576600       | 0.28301900  |
| Frequency and Energy at B3LYP/6-311G(d,p) in gas phase |                             |                  |             |
| Zero-point correction=                                 | 0.291785 (Hartree/Particle) |                  |             |
| Thermal correction to Energy=                          | 0.315494                    |                  |             |
| Thermal correction to Enthalpy=                        | 0.316439                    |                  |             |
| Thermal correction to Gibbs Free Energy=               | 0.234699                    |                  |             |
| Sum of electronic and zero-point Energies=             | -1257.527651                |                  |             |
| Sum of electronic and thermal Energies=                | -1257.503942                |                  |             |
| Sum of electronic and thermal Enthalpies=              | -1257.502998                |                  |             |
| Sum of electronic and thermal Free Energies=           | -1257.584737                |                  |             |

| Name of compound                                      |                             | TS-9-O4'-H-OOH |             |
|-------------------------------------------------------|-----------------------------|----------------|-------------|
| Cartesian Coordinates optimized at B3LYP/6-311G(d,p)  |                             |                |             |
| C                                                     | 3.27935300                  | 0.27283900     | 1.75075100  |
| C                                                     | 4.11748000                  | 1.29730700     | 1.32442500  |
| C                                                     | 4.05891700                  | 1.71807400     | -0.00027700 |
| C                                                     | 3.17830300                  | 1.12462500     | -0.90816300 |
| H                                                     | 3.32154000                  | -0.08247500    | 2.77155600  |
| H                                                     | 4.81517000                  | 1.76395900     | 2.01249100  |
| C                                                     | 1.46121600                  | -1.43673300    | 1.31160200  |
| C                                                     | 0.57368100                  | -1.45765000    | -1.06451700 |
| C                                                     | 1.09775800                  | -2.31098100    | 0.11579400  |
| O                                                     | 1.52748800                  | -0.45267300    | -1.42662200 |
| O                                                     | 3.12174600                  | 1.53237500     | -2.20569200 |
| H                                                     | 3.77709000                  | 2.23404300     | -2.31109200 |
| O                                                     | 4.83522200                  | 2.72358300     | -0.53321100 |
| H                                                     | 5.42712900                  | 3.06989800     | 0.14090800  |
| O                                                     | 0.19764600                  | -3.34570600    | 0.49300000  |
| H                                                     | -0.64797600                 | -2.93902700    | 0.72249400  |
| H                                                     | 2.00482500                  | -2.82315300    | -0.21393600 |
| C                                                     | -0.80473800                 | -0.86083000    | -0.83606300 |
| C                                                     | -0.97328200                 | 0.48991700     | -0.47004400 |
| C                                                     | -1.93084300                 | -1.67450700    | -1.01225800 |
| C                                                     | -2.23475800                 | 1.01804600     | -0.26372600 |
| H                                                     | -0.10604300                 | 1.12913800     | -0.37759100 |
| C                                                     | -3.20208600                 | -1.16046400    | -0.79133200 |
| H                                                     | -1.83553400                 | -2.70427000    | -1.33641800 |
| C                                                     | -3.37558500                 | 0.20595700     | -0.41091500 |
| H                                                     | -2.37092900                 | 2.05816400     | 0.00550000  |
| H                                                     | 0.51717600                  | -2.11146900    | -1.93786100 |
| O                                                     | -4.61909800                 | 0.61006300     | -0.24903500 |
| H                                                     | -4.69404300                 | 1.43777700     | 0.50401600  |
| C                                                     | 2.34392400                  | 0.08946400     | -0.46699900 |
| C                                                     | 2.38574200                  | -0.33213100    | 0.86803500  |
| O                                                     | -4.29713400                 | -1.92658200    | -0.93839200 |
| H                                                     | -5.05670700                 | -1.35559400    | -0.73176000 |
| H                                                     | 0.52920700                  | -0.99917100    | 1.70991700  |
| O                                                     | 2.08529900                  | -2.21333800    | 2.32435700  |
| H                                                     | 1.53153900                  | -2.99500700    | 2.44148600  |
| H                                                     | -6.13065200                 | 3.46133100     | 1.85784500  |
| O                                                     | -4.77864000                 | 2.24755600     | 1.48104800  |
| O                                                     | -5.68906500                 | 3.19450300     | 1.03761800  |
| Frequency and Energy at B3LYP/6-311G(d,p)in gas phase |                             |                |             |
| Zero-point correction=                                | 0.287305 (Hartree/Particle) |                |             |
| Thermal correction to Energy=                         | 0.309986                    |                |             |
| Thermal correction to Enthalpy=                       | 0.310930                    |                |             |
| Thermal correction to Gibbs Free Energy=              | 0.232946                    |                |             |
| Sum of electronic and zero-point Energies=            | -1257.522838                |                |             |
| Sum of electronic and thermal Energies=               | -1257.500157                |                |             |
| Sum of electronic and thermal Enthalpies=             | -1257.499213                |                |             |
| Sum of electronic and thermal Free Energies=          | -1257.577197                |                |             |

| Name of compound                                     |            | Int2-9-O4'-H-OOH |            |
|------------------------------------------------------|------------|------------------|------------|
| Cartesian Coordinates optimized at B3LYP/6-311G(d,p) |            |                  |            |
| C                                                    | 3.32931300 | 0.14110200       | 1.64075900 |

|   |             |             |             |
|---|-------------|-------------|-------------|
| C | 4.05115900  | 1.28117700  | 1.30576500  |
| C | 3.85455200  | 1.87188600  | 0.06175700  |
| C | 2.94825700  | 1.33516200  | -0.85671400 |
| H | 3.48115700  | -0.34358400 | 2.59575000  |
| H | 4.76581700  | 1.70739400  | 2.00242200  |
| C | 1.61707800  | -1.64416100 | 1.09450000  |
| C | 0.52052500  | -1.39215300 | -1.18080100 |
| C | 1.19729800  | -2.36557300 | -0.18232600 |
| O | 1.38021900  | -0.29021700 | -1.47617800 |
| O | 2.75169900  | 1.90979900  | -2.07395000 |
| H | 3.33138300  | 2.68101100  | -2.12223200 |
| O | 4.50707900  | 3.00136400  | -0.37677700 |
| H | 5.10126400  | 3.32323400  | 0.30752400  |
| O | 0.40181700  | -3.50716900 | 0.10738500  |
| H | -0.42548200 | -3.20796600 | 0.50542700  |
| H | 2.09923800  | -2.75563400 | -0.65968300 |
| C | -0.86068900 | -0.92513400 | -0.75777200 |
| C | -1.06150100 | 0.37228500  | -0.20102600 |
| C | -1.94627600 | -1.78838200 | -0.93879700 |
| C | -2.29963200 | 0.79584200  | 0.20074700  |
| H | -0.21306600 | 1.03682300  | -0.11140400 |
| C | -3.21198700 | -1.38369800 | -0.54088900 |
| H | -1.82172300 | -2.75808900 | -1.40628200 |
| C | -3.43923100 | -0.06667100 | 0.05694600  |
| H | -2.46550100 | 1.77955000  | 0.62361900  |
| H | 0.41501300  | -1.92456500 | -2.12913200 |
| O | -4.62132900 | 0.21203300  | 0.39045300  |
| H | -4.81292900 | 1.91146900  | 1.05886000  |
| C | 2.23331400  | 0.18286200  | -0.50827200 |
| C | 2.41495400  | -0.41310900 | 0.74566000  |
| O | -4.28430600 | -2.15763200 | -0.68353700 |
| H | -5.02845700 | -1.62659900 | -0.33188400 |
| H | 0.70105500  | -1.34828100 | 1.63661200  |
| O | 2.39252100  | -2.50246600 | 1.91783300  |
| H | 1.90714300  | -3.33440900 | 1.97697000  |
| H | -5.81355300 | 4.06027900  | 0.58400500  |
| O | -4.67273300 | 2.81241300  | 1.41577000  |
| O | -5.01798700 | 3.62072000  | 0.25802800  |

Frequency and Energy at B3LYP/6-311G(d,p) in gas phase

|                                              |                             |
|----------------------------------------------|-----------------------------|
| Zero-point correction=                       | 0.292314 (Hartree/Particle) |
| Thermal correction to Energy=                | 0.315714                    |
| Thermal correction to Enthalpy=              | 0.316658                    |
| Thermal correction to Gibbs Free Energy=     | 0.236683                    |
| Sum of electronic and zero-point Energies=   | -1257.543125                |
| Sum of electronic and thermal Energies=      | -1257.519726                |
| Sum of electronic and thermal Enthalpies=    | -1257.518781                |
| Sum of electronic and thermal Free Energies= | -1257.598757                |

**Table S6: The calculated  $\Delta G^\ddagger$  and rate constant  $k$  at the M05-2X/6-311G(d,p) level of theory at 298.15 K in the gas phase.**

| <b>Reactions</b>      | <b><math>\Delta G^\ddagger</math> (kcal/mol)</b> | <b><math>k</math></b><br>(L.mol <sup>-1</sup> .s <sup>-1</sup> ) |
|-----------------------|--------------------------------------------------|------------------------------------------------------------------|
| <b>1-C3-H + HOO•</b>  | 14.1                                             | 4.10×10 <sup>4</sup>                                             |
| <b>1-O4'-H + HOO•</b> | 16.3                                             | 1.08×10 <sup>3</sup>                                             |
| <b>9-C4-H + HOO•</b>  | 17.3                                             | 6.62×10 <sup>2</sup>                                             |
| <b>9-O7-H + HOO•</b>  | 10.2                                             | 1.75×10 <sup>7</sup>                                             |
| <b>9-O4'-H + HOO•</b> | 11.3                                             | 8.96×10 <sup>6</sup>                                             |



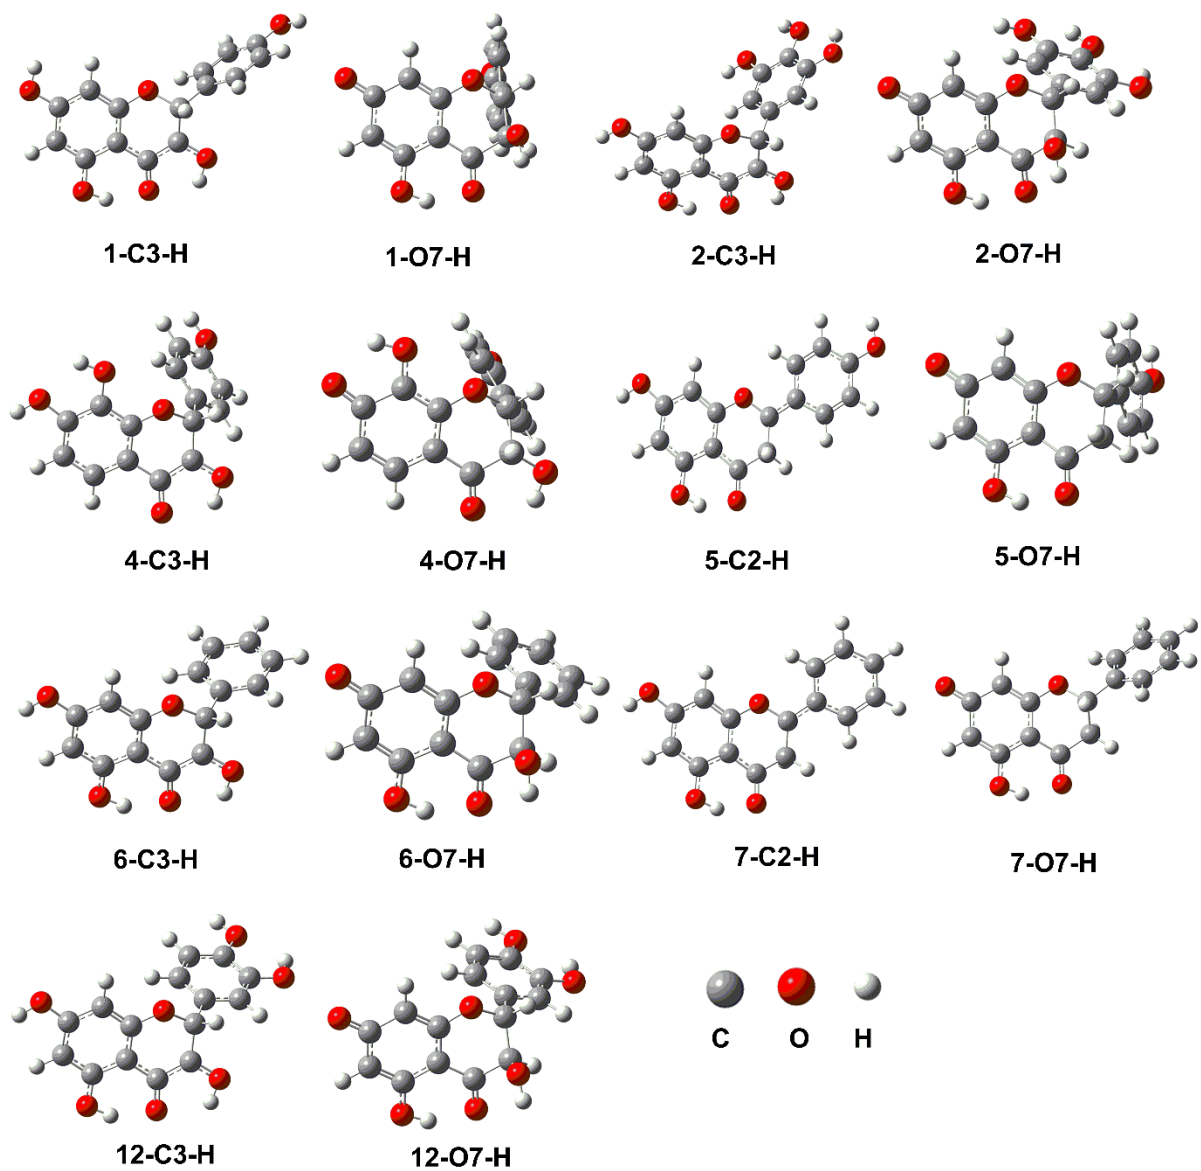

**Figure S1:** Optimized geometries of the radicals of the compounds **1**, **2**, **4**, **5**, **6**, **7** and **12**.

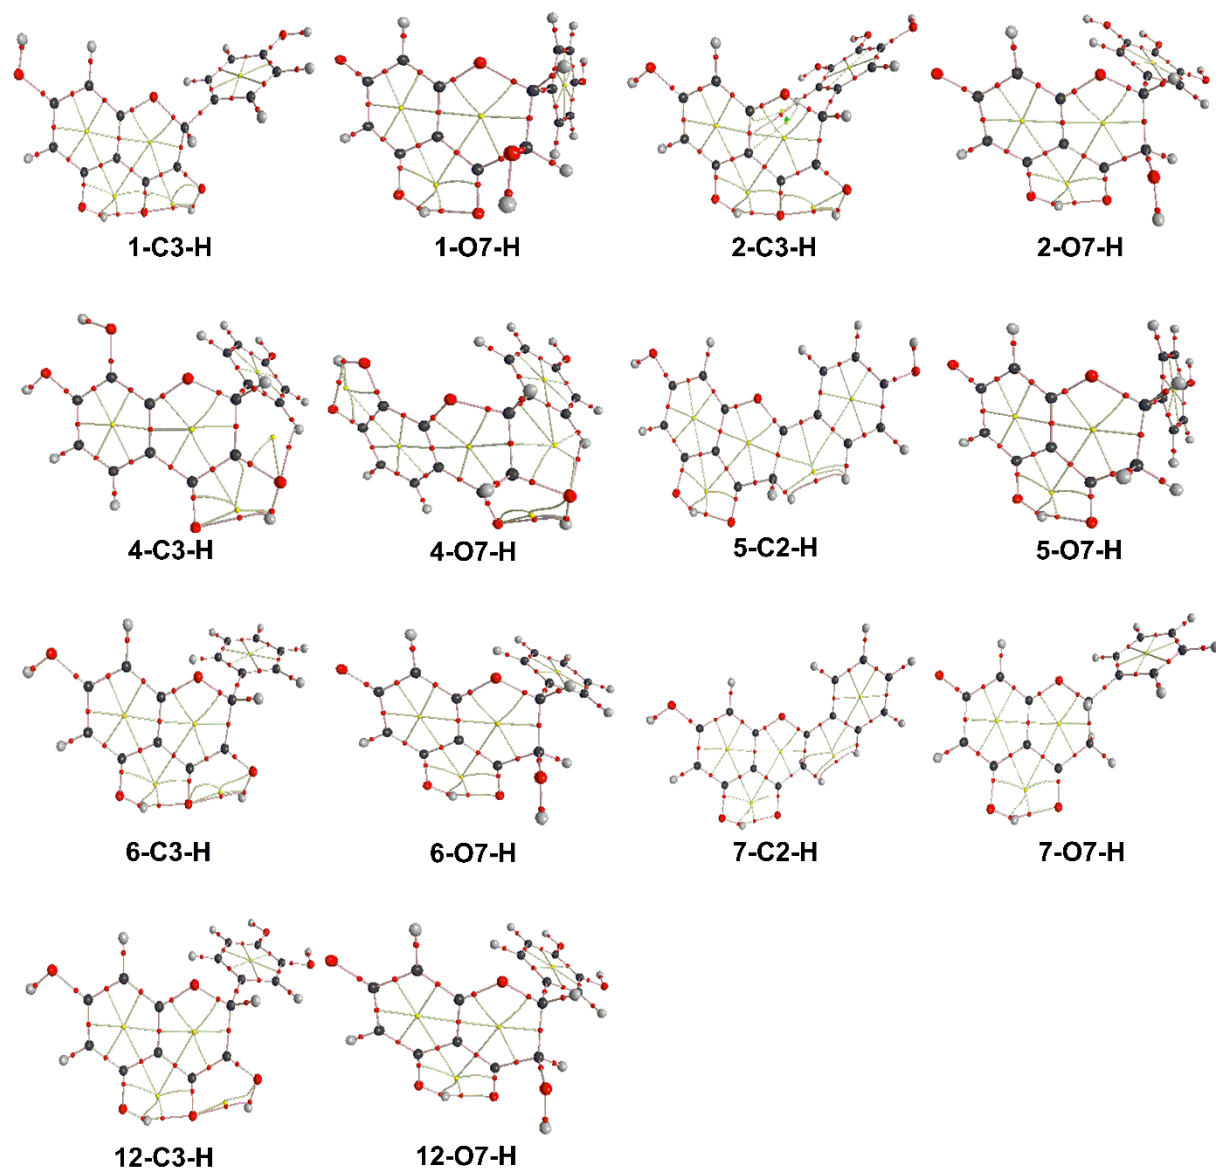

**Figure S2:** Topological shape of radicals formed by **1**, **2**, **4**, **5**, **6**, **7** and **12** (B3LYP/6-311G(d,p))

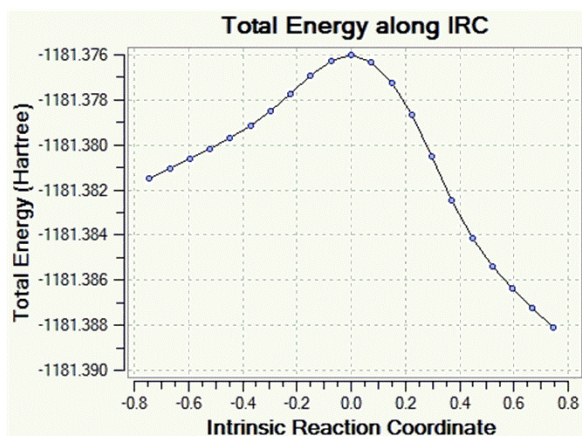

**1-C3-H-OOH**

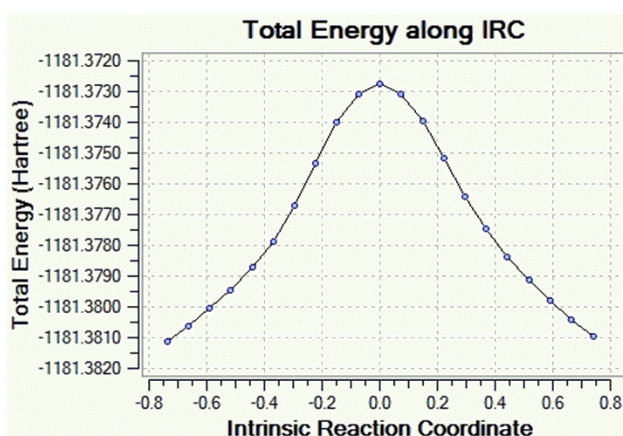

**1-O4'-H-OOH**

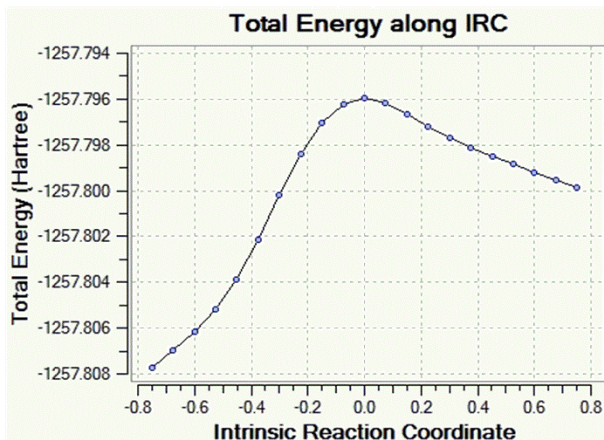

**9-C4-H-OOH**

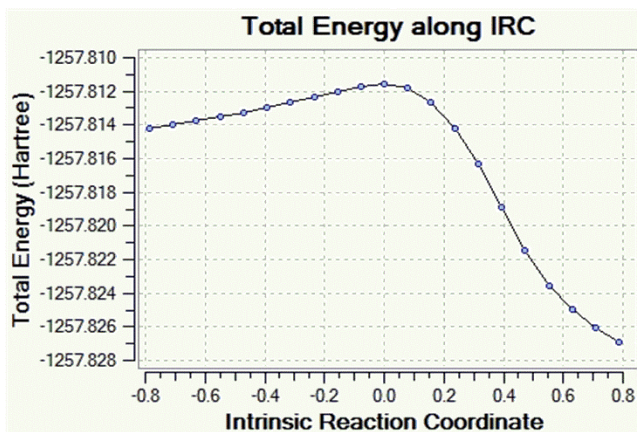

**9-O7-H-OOH**

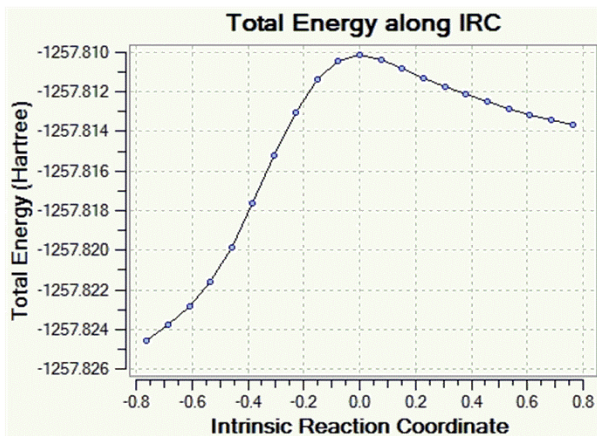

**9-O4'-H-OOH**

**Figure S3:** IRC plots for all transition states related to the reaction of HOO• radical with dihydrokaempferol **1**, and isomelacacidin **9** at B3LYP/6-311G(d,p) level of theory in the gas phase.

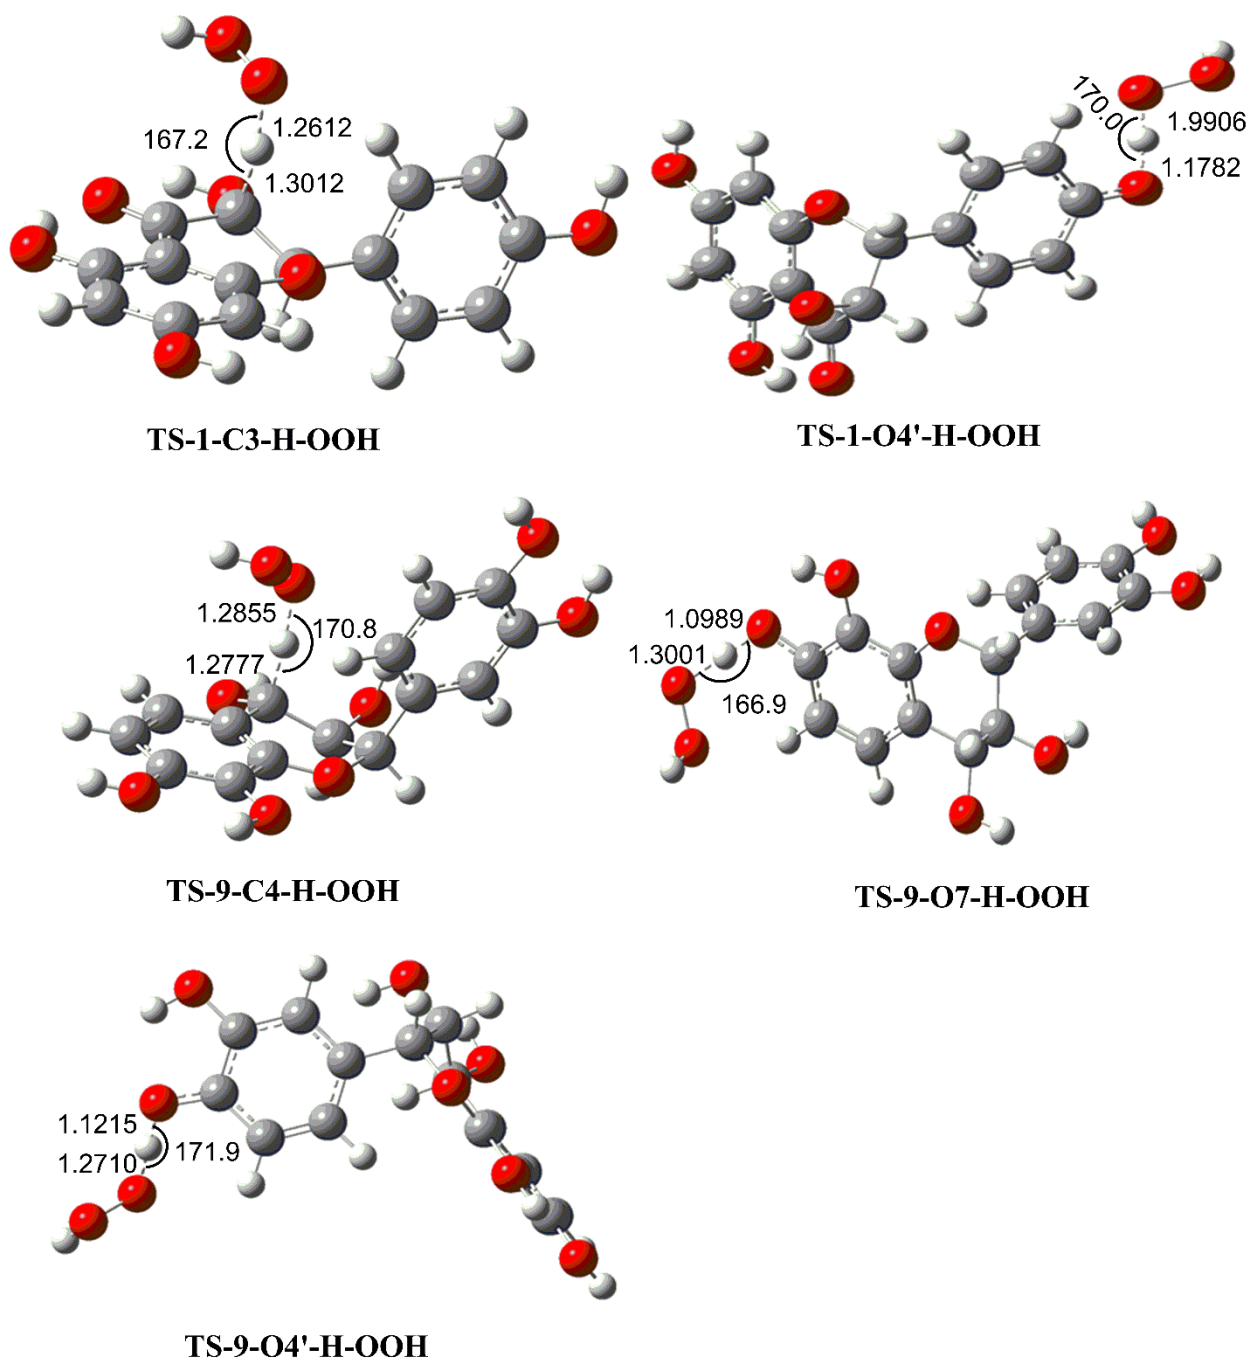

**Figure S4.** Optimized geometries of TS for the H abstraction channel of reaction between the selected phenolic compounds and the HOO<sup>•</sup> radical at the B3LYP/6-311G(d,p) level of theory (distances are given in angstroms)
